# Supplementary material for: Formation of trisubstituted buta-1,3-dienes and α,β-unsaturated ketones via the reaction of functionalized vinyl phosphates and vinyl phosphordiamidates with organometallic reagents
Source: Royal Society of Chemistry journal article supplement (doi:10.1039/d0ra07472a), 2020-01-01

## **Formation of Trisubstituted Buta-1,3-dienes and $\alpha,\beta$ -Unsaturated Ketones via the Reaction of Functionalized Vinyl Phosphates and Vinyl Phosphordiamidates with Organometallic Reagents.**

Petr Oeser,<sup>a</sup> Jakub Koudelka,<sup>a</sup> Hana Dvořáková<sup>b</sup> and Tomáš Tobrman\*<sup>c</sup>

<sup>a</sup> Department of Organic Chemistry, University of Chemistry and Technology, Prague, Technická 5, 166 28 Prague 6, Czech Republic. Email: tomas.tobrman@vscht.cz

<sup>b</sup> Laboratory of NMR spectroscopy, University of Chemistry and Technology, Prague, Technická 5, 166 28 Prague 6, Czech Republic.

### **Supporting Information**

**Copies of  $^1\text{H}$  and  $^{13}\text{C}$  NMR spectra**

**S2-S63**

# Copies of $^1\text{H}$ and $^{13}\text{C}$ NMR spectra

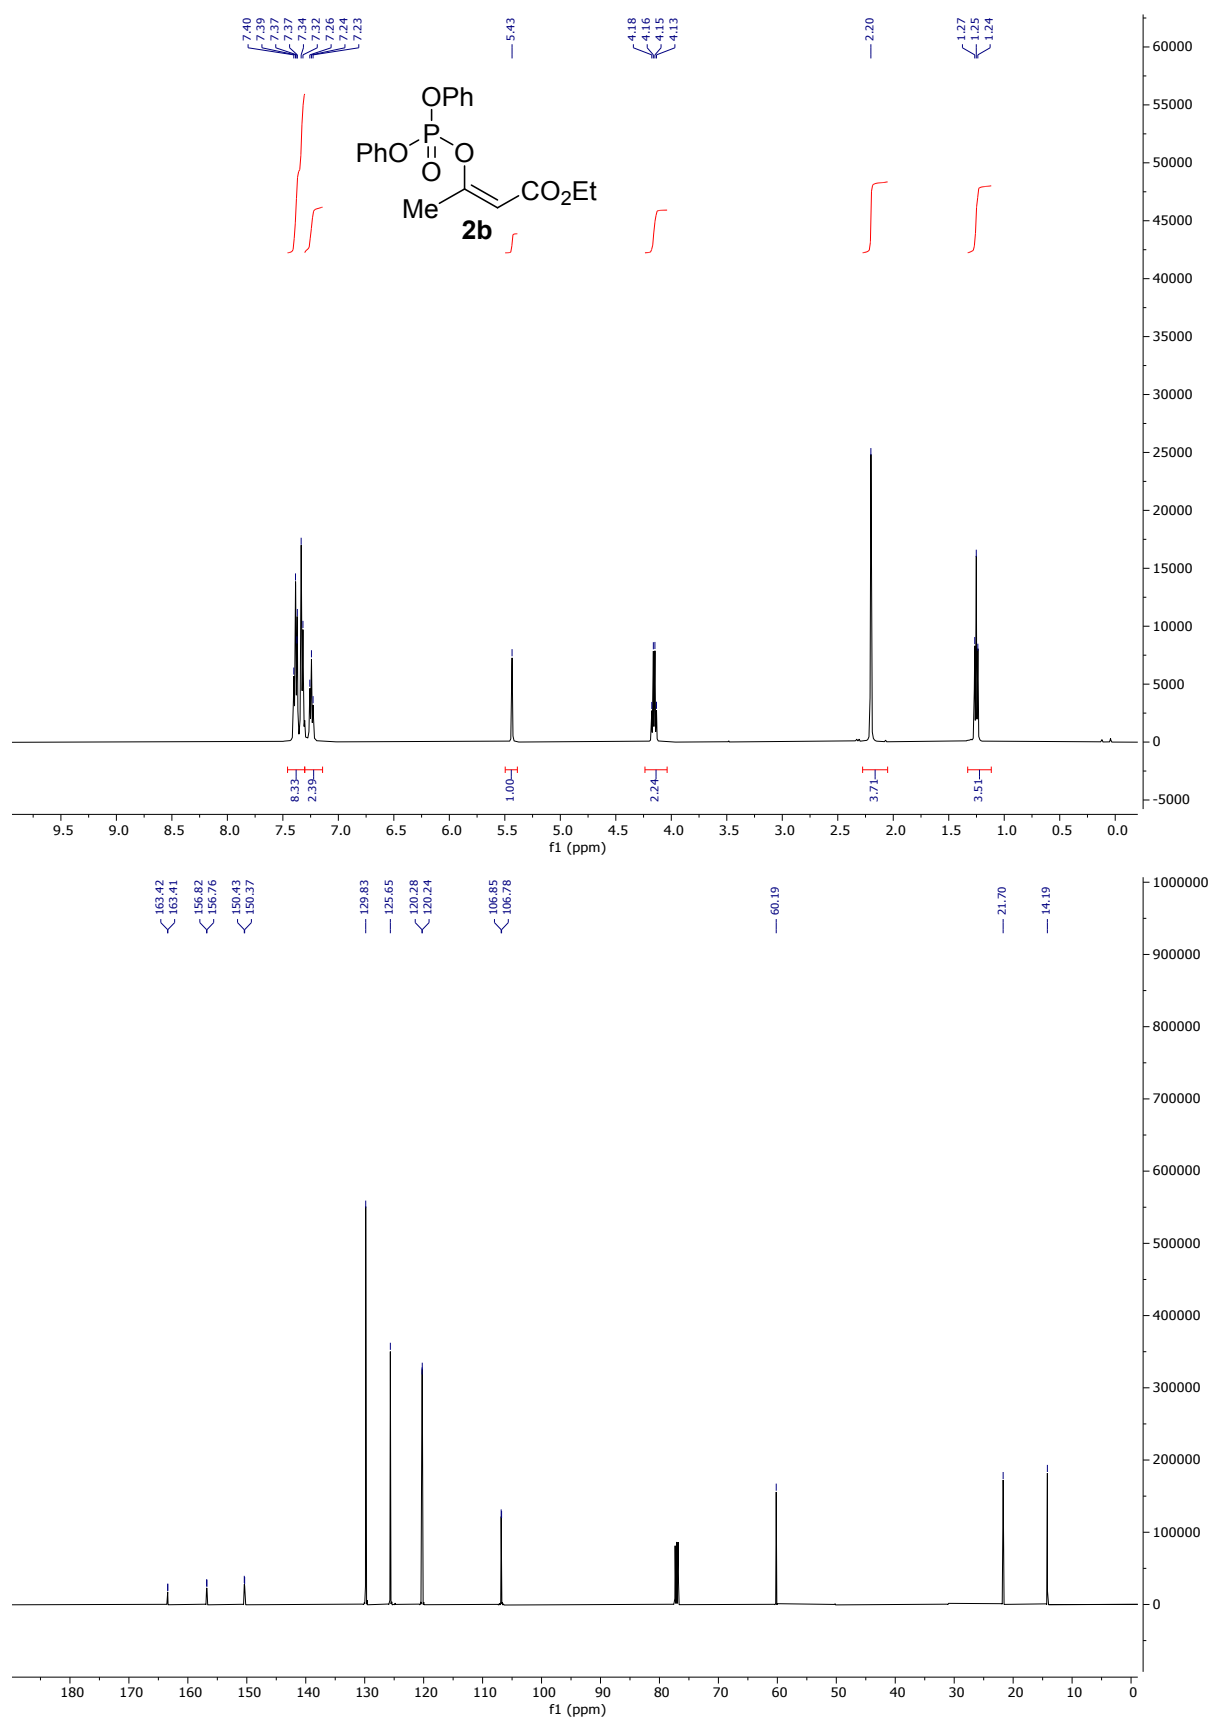

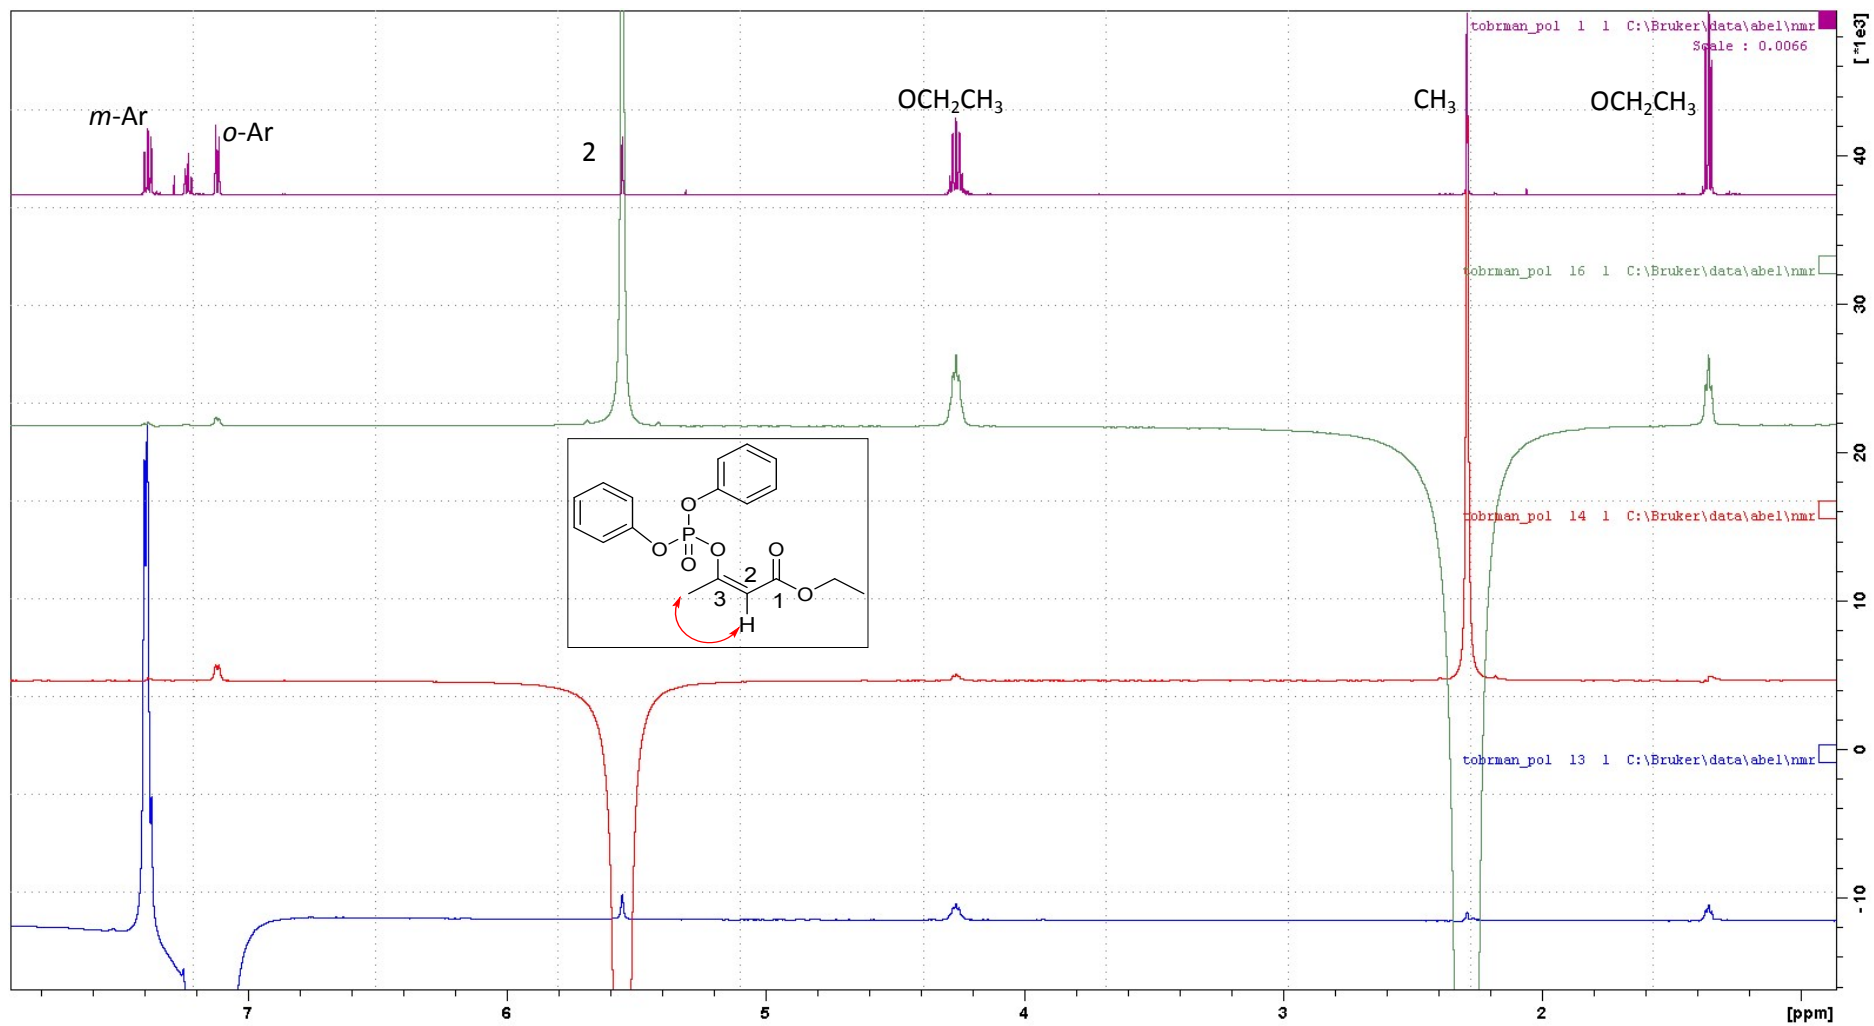

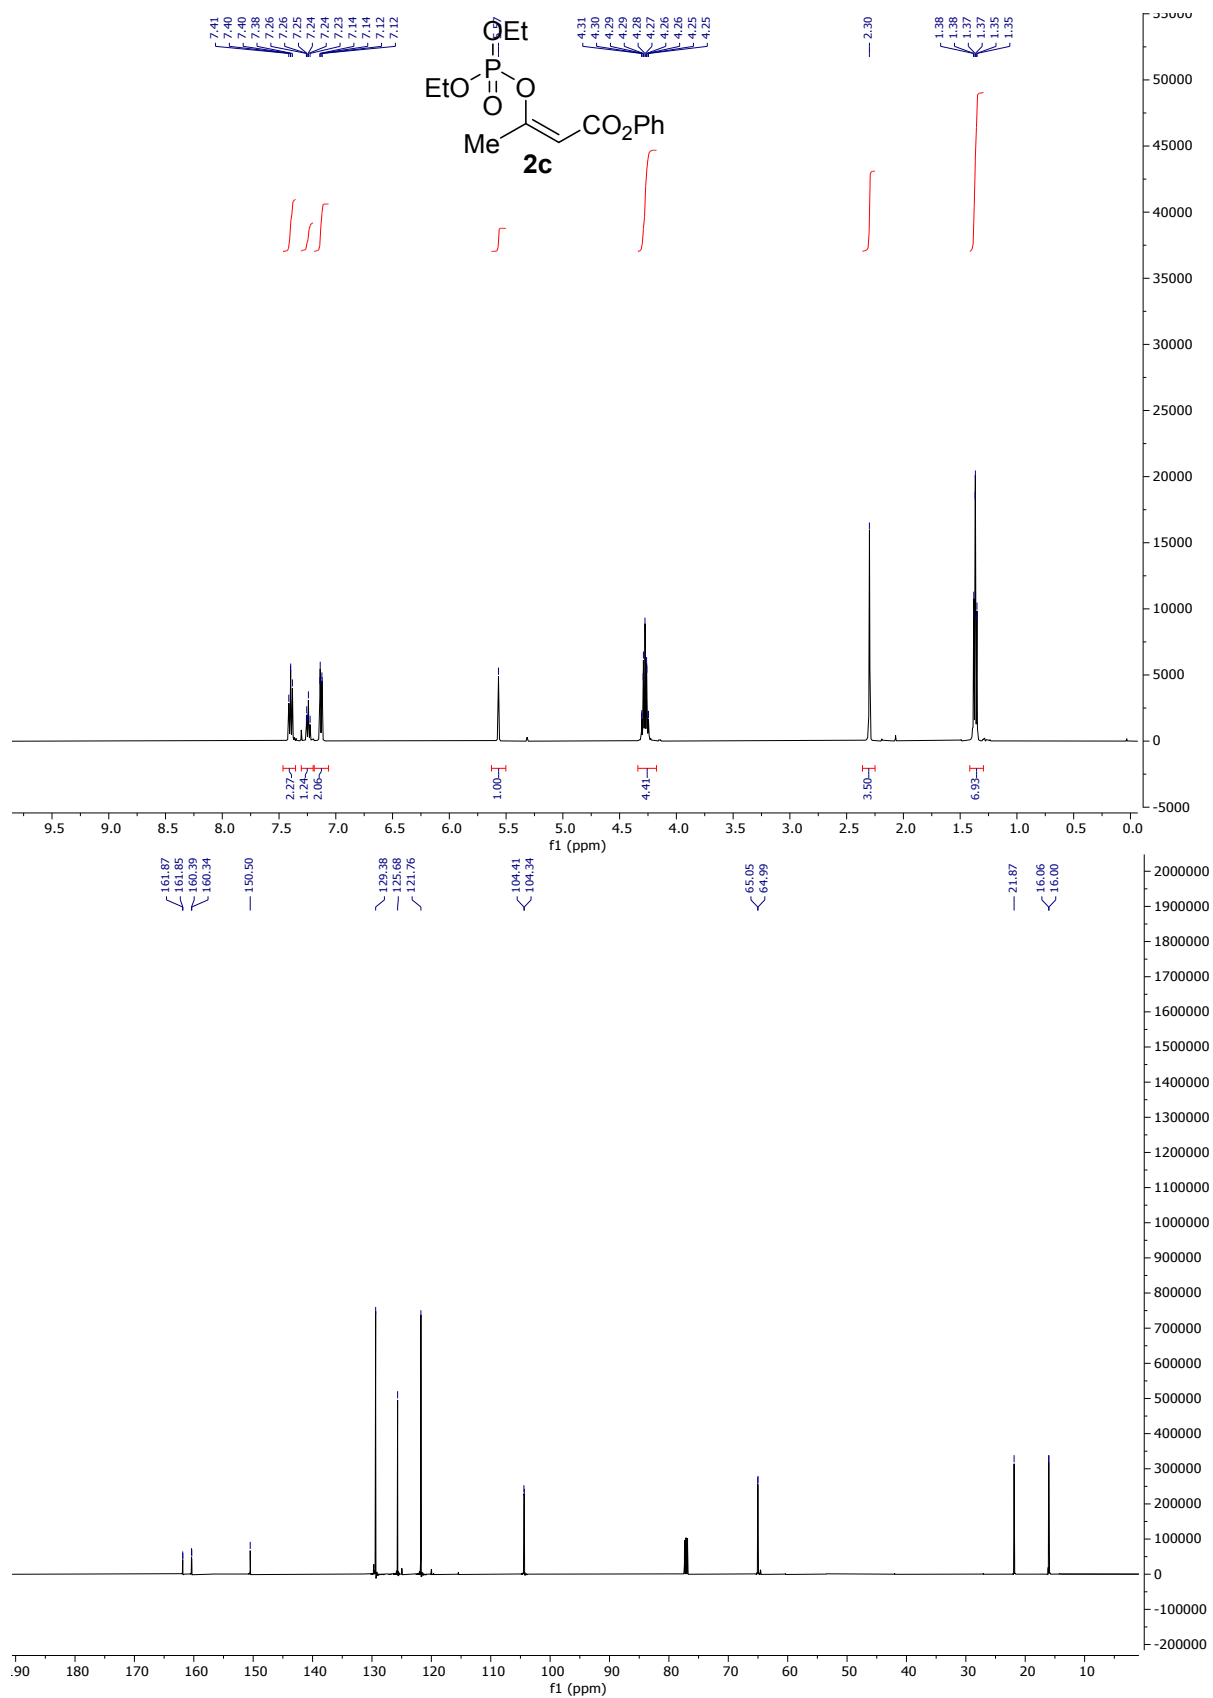

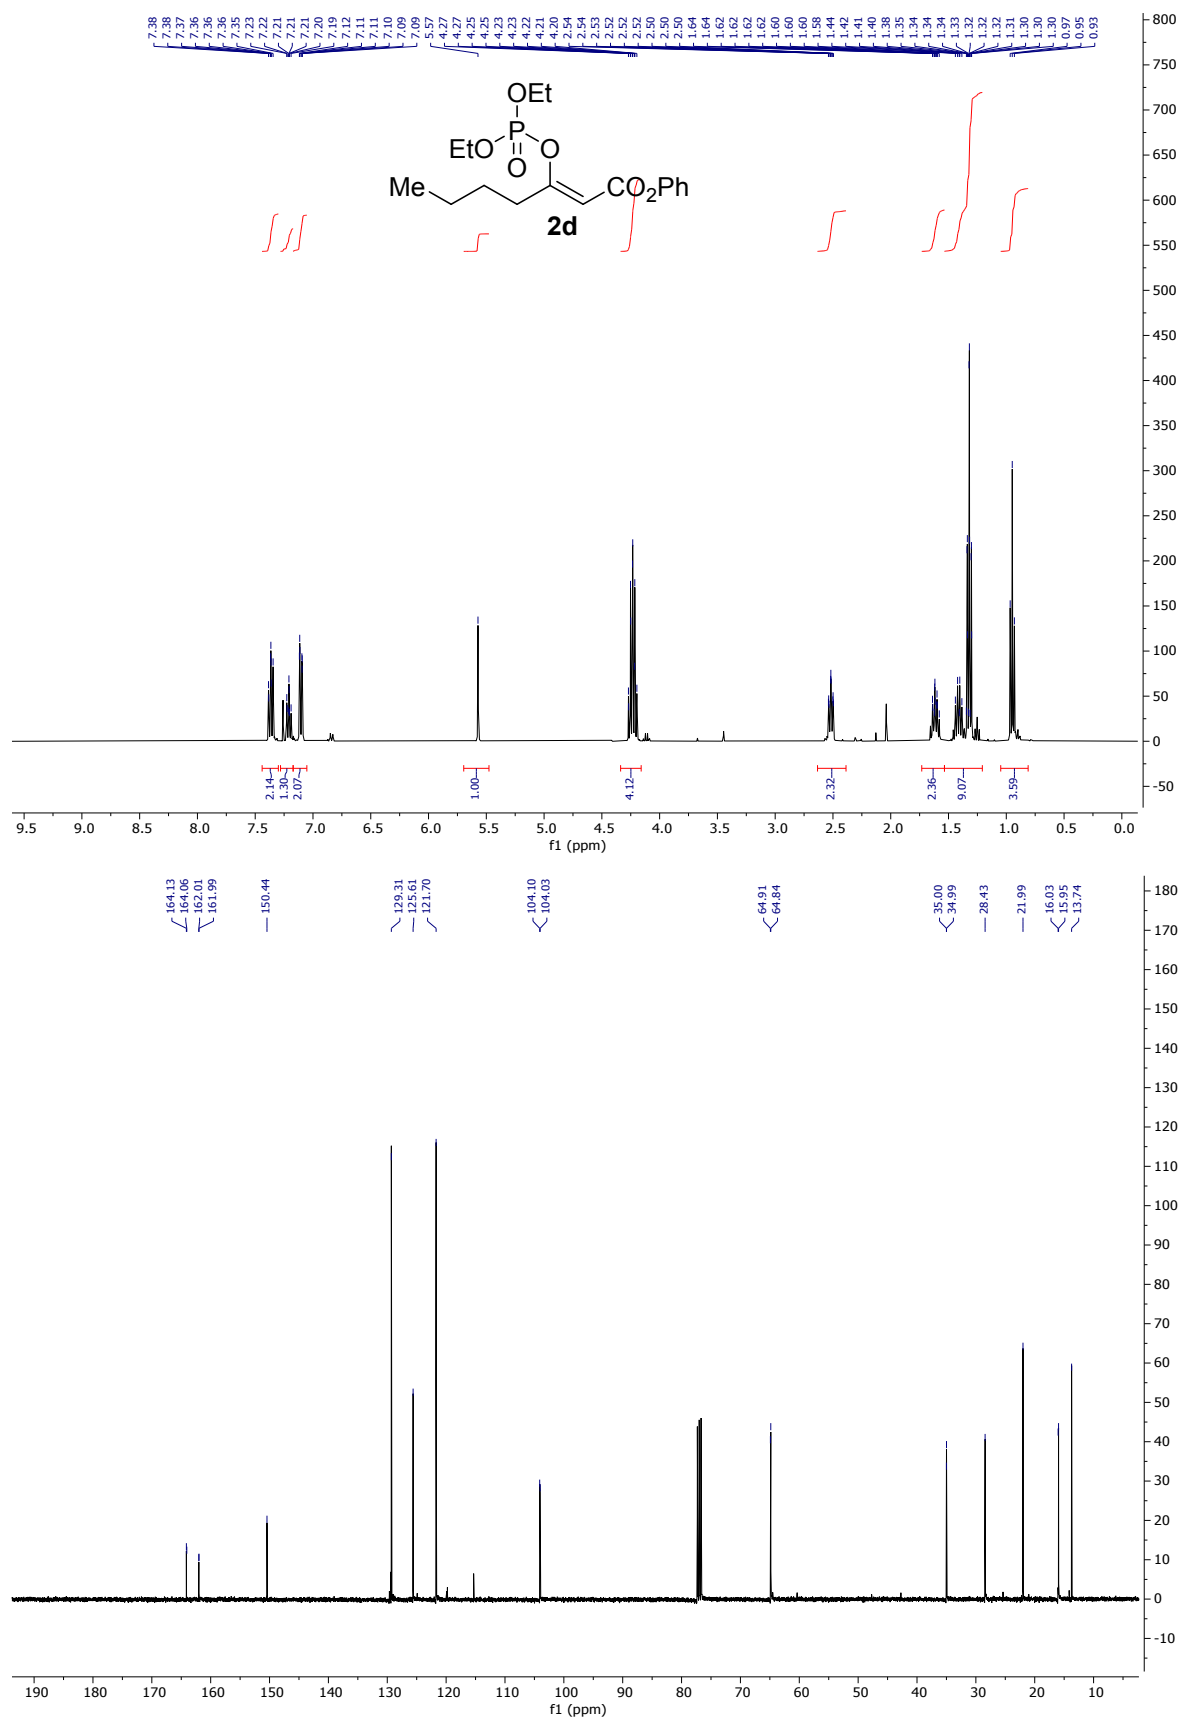

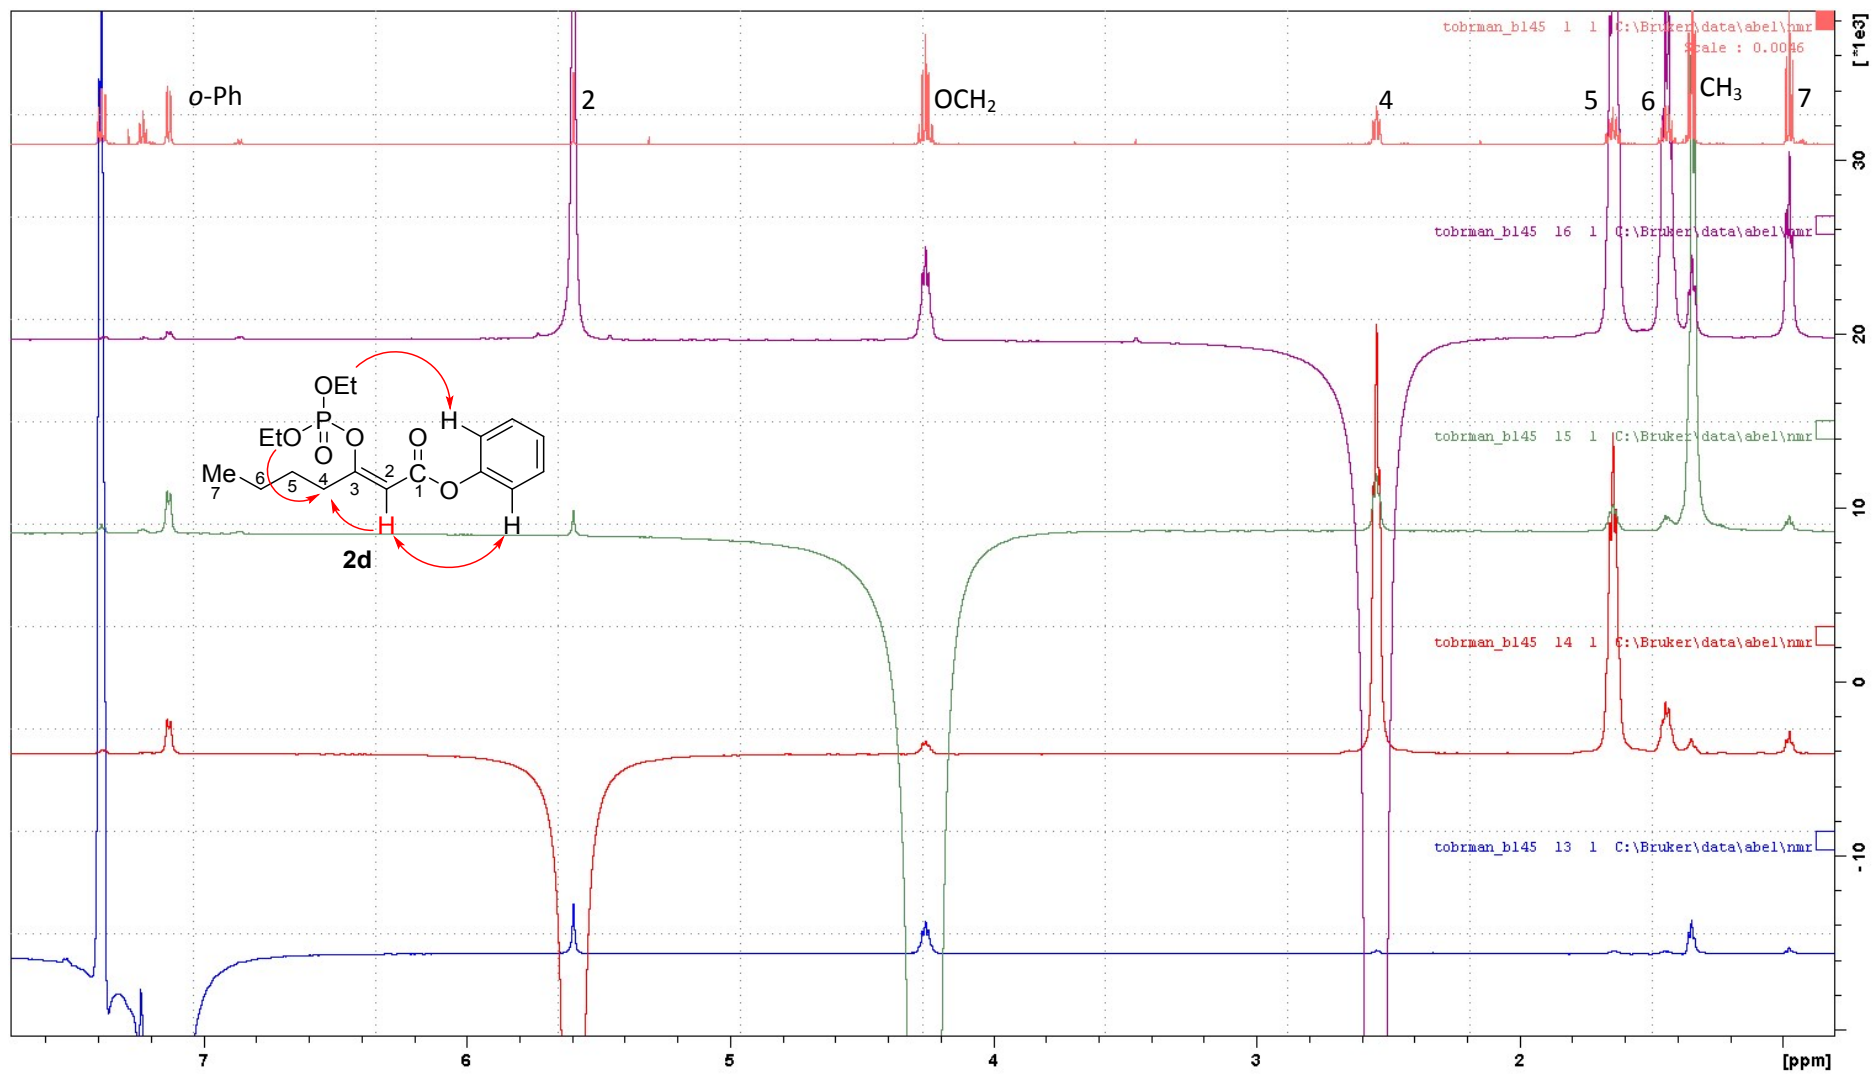

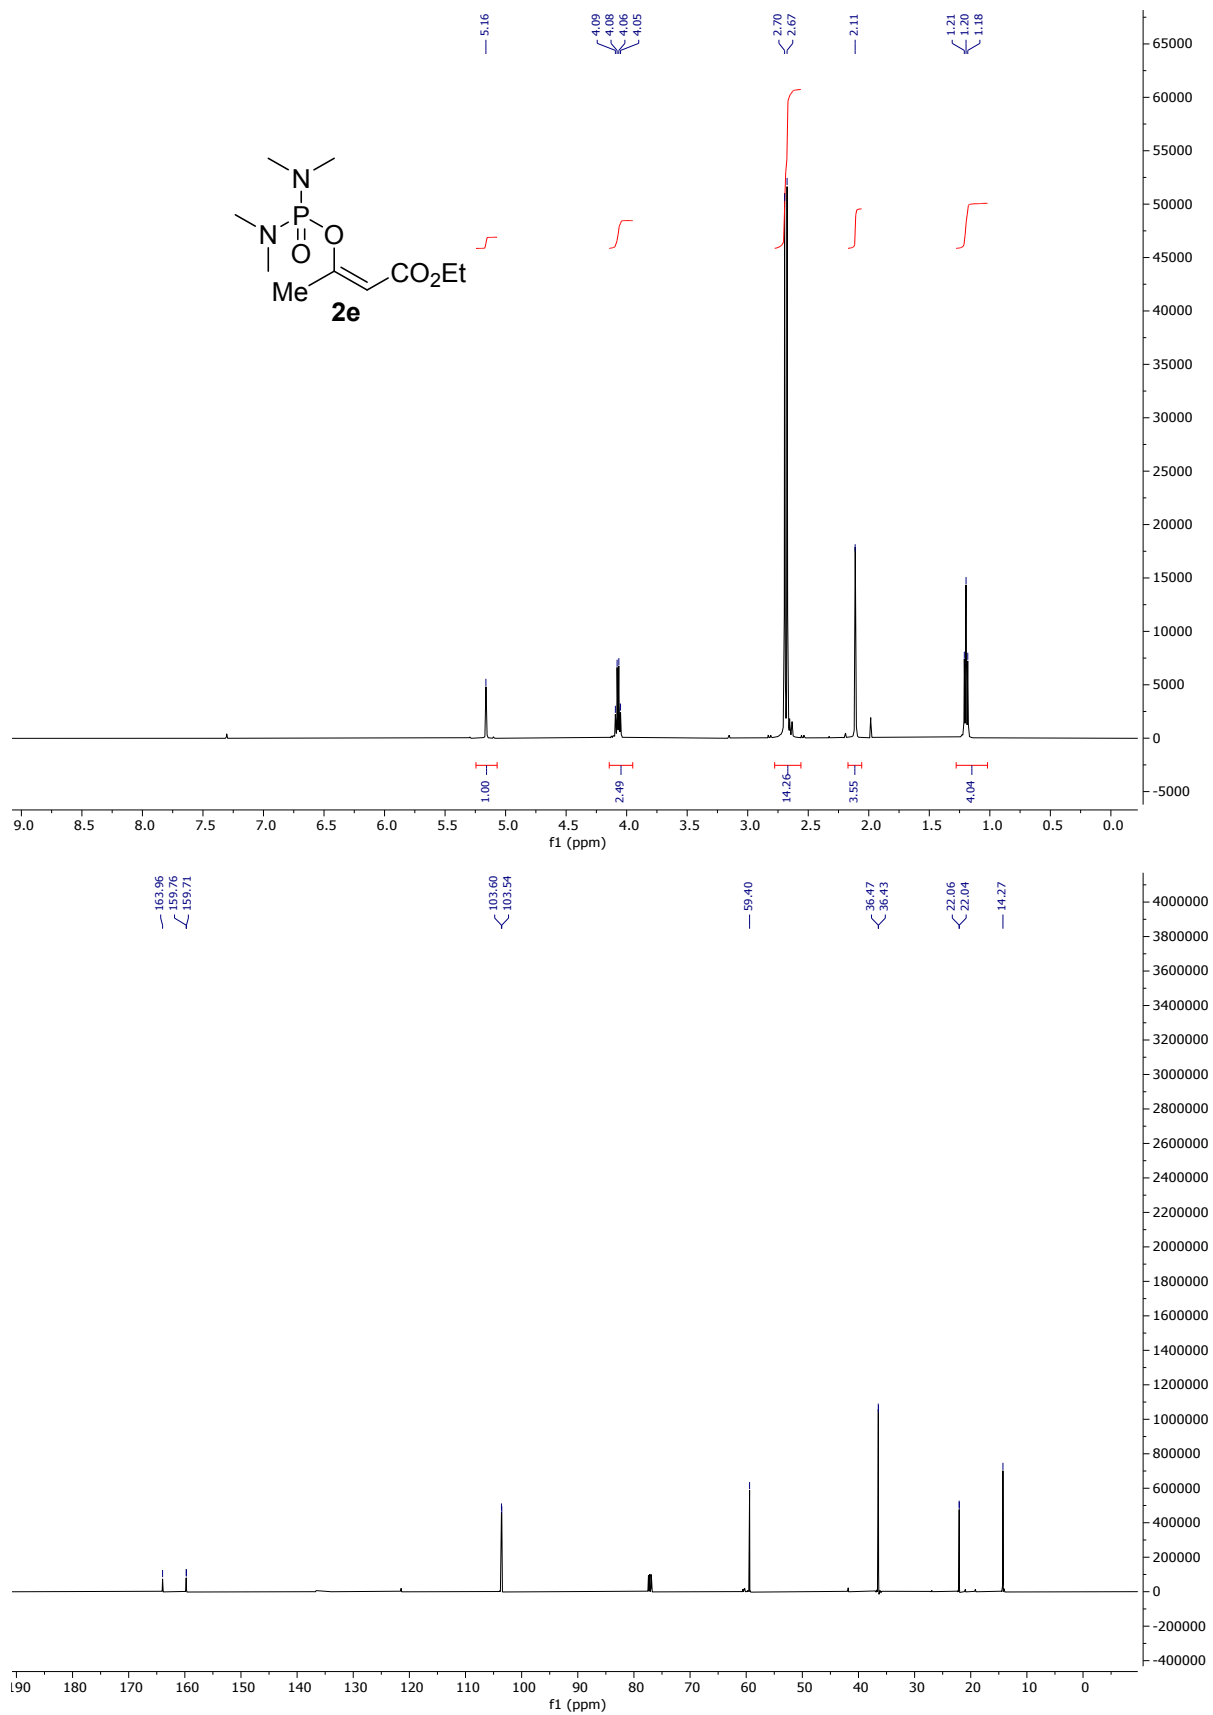

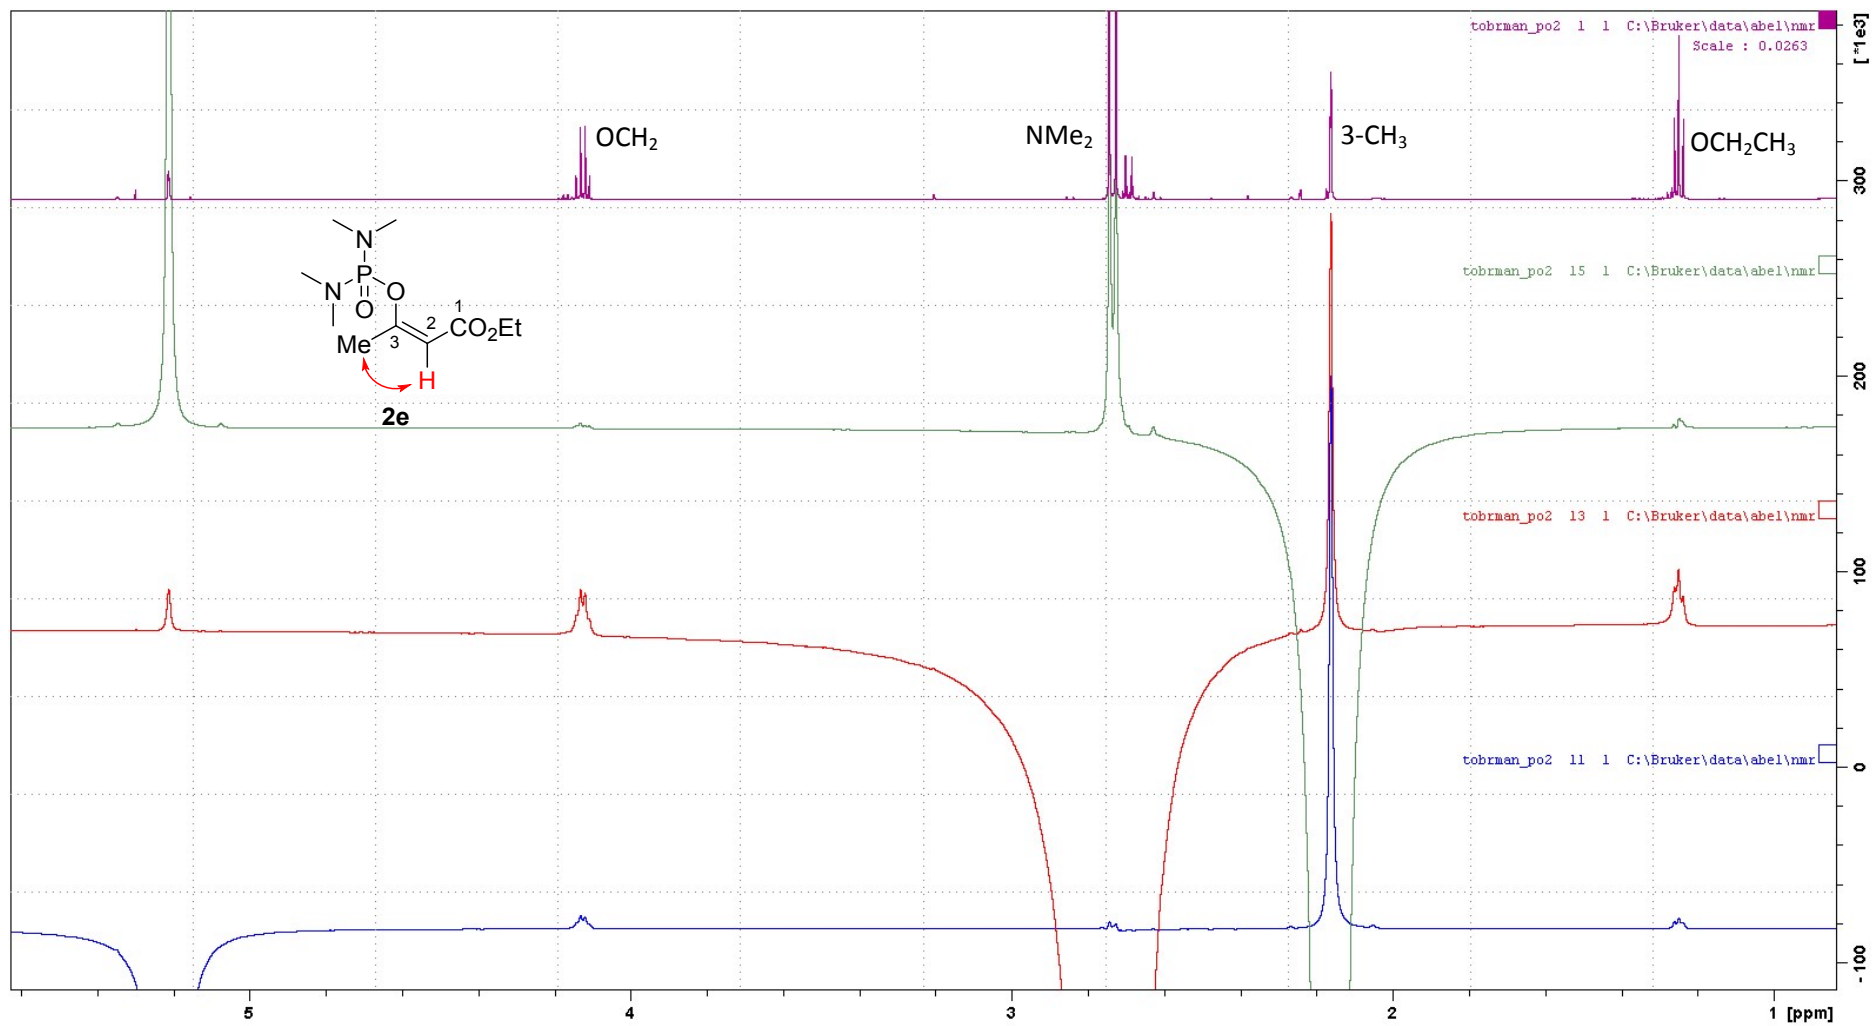



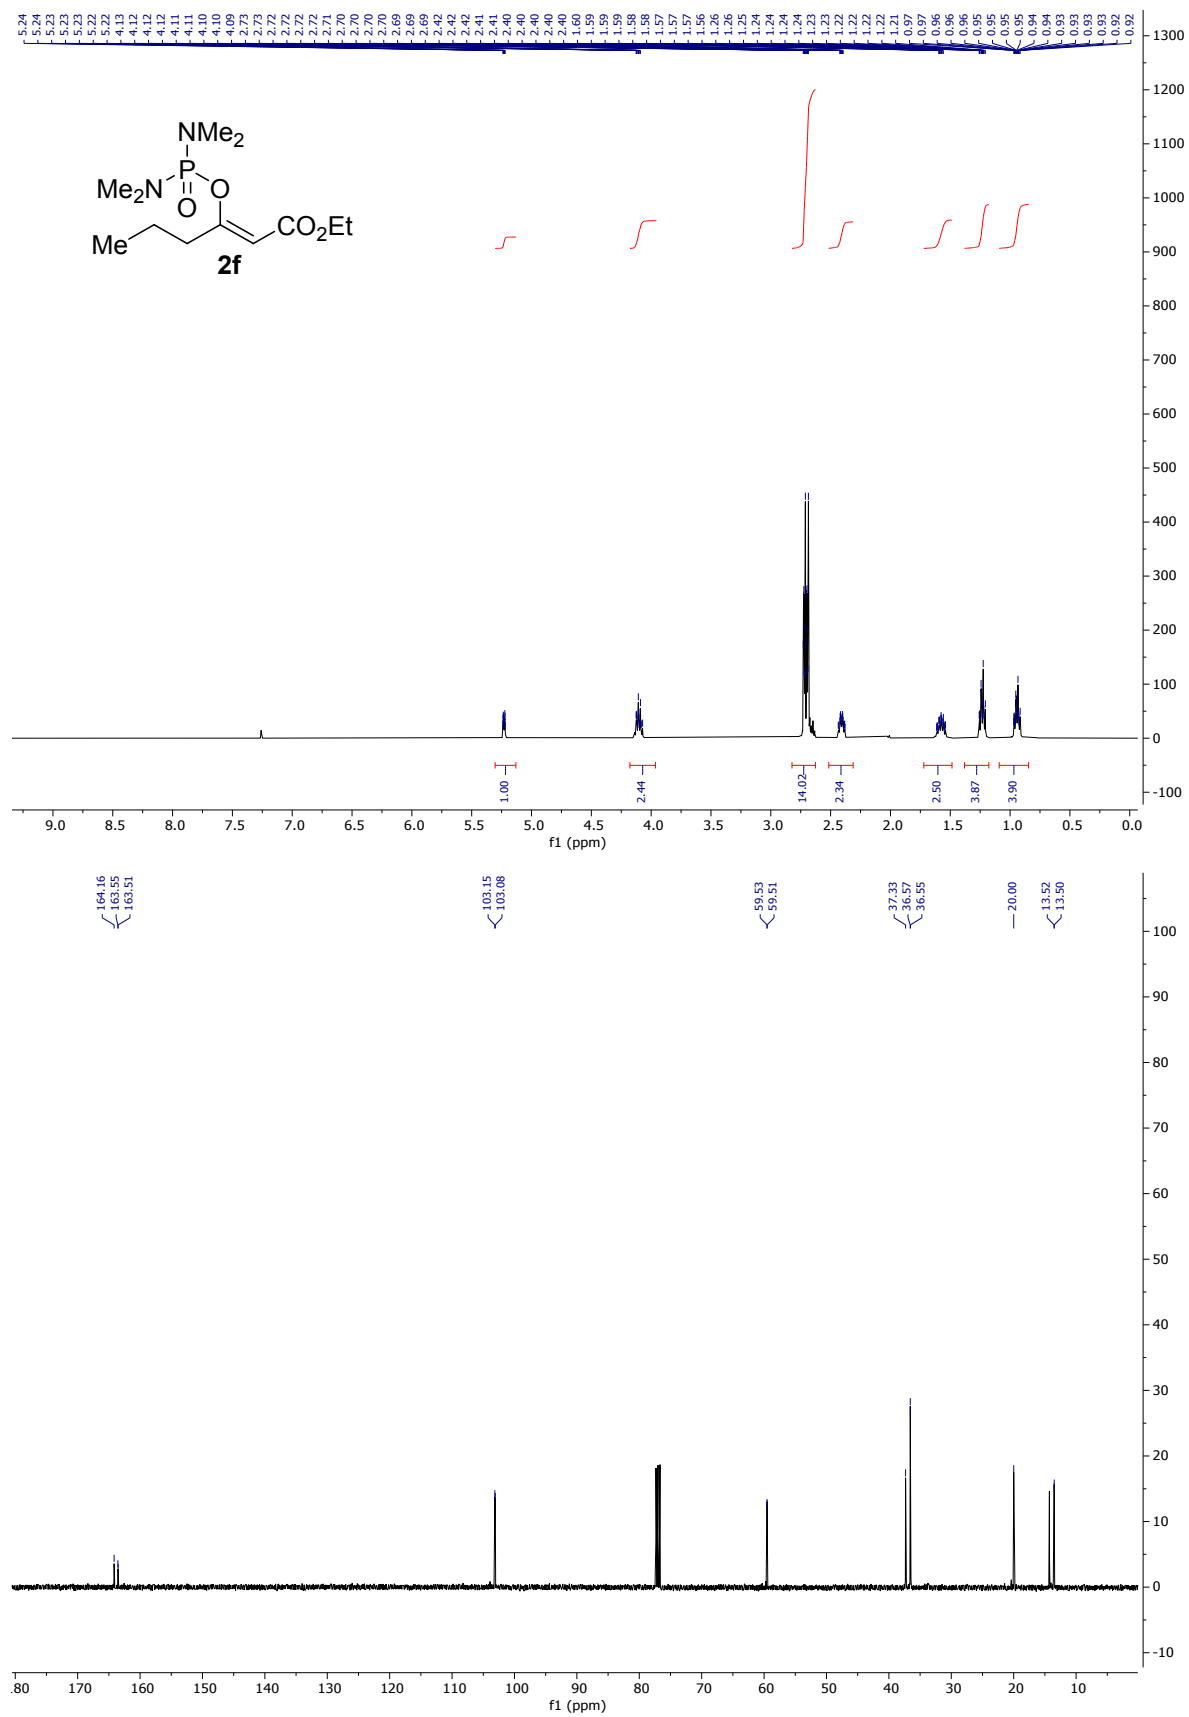

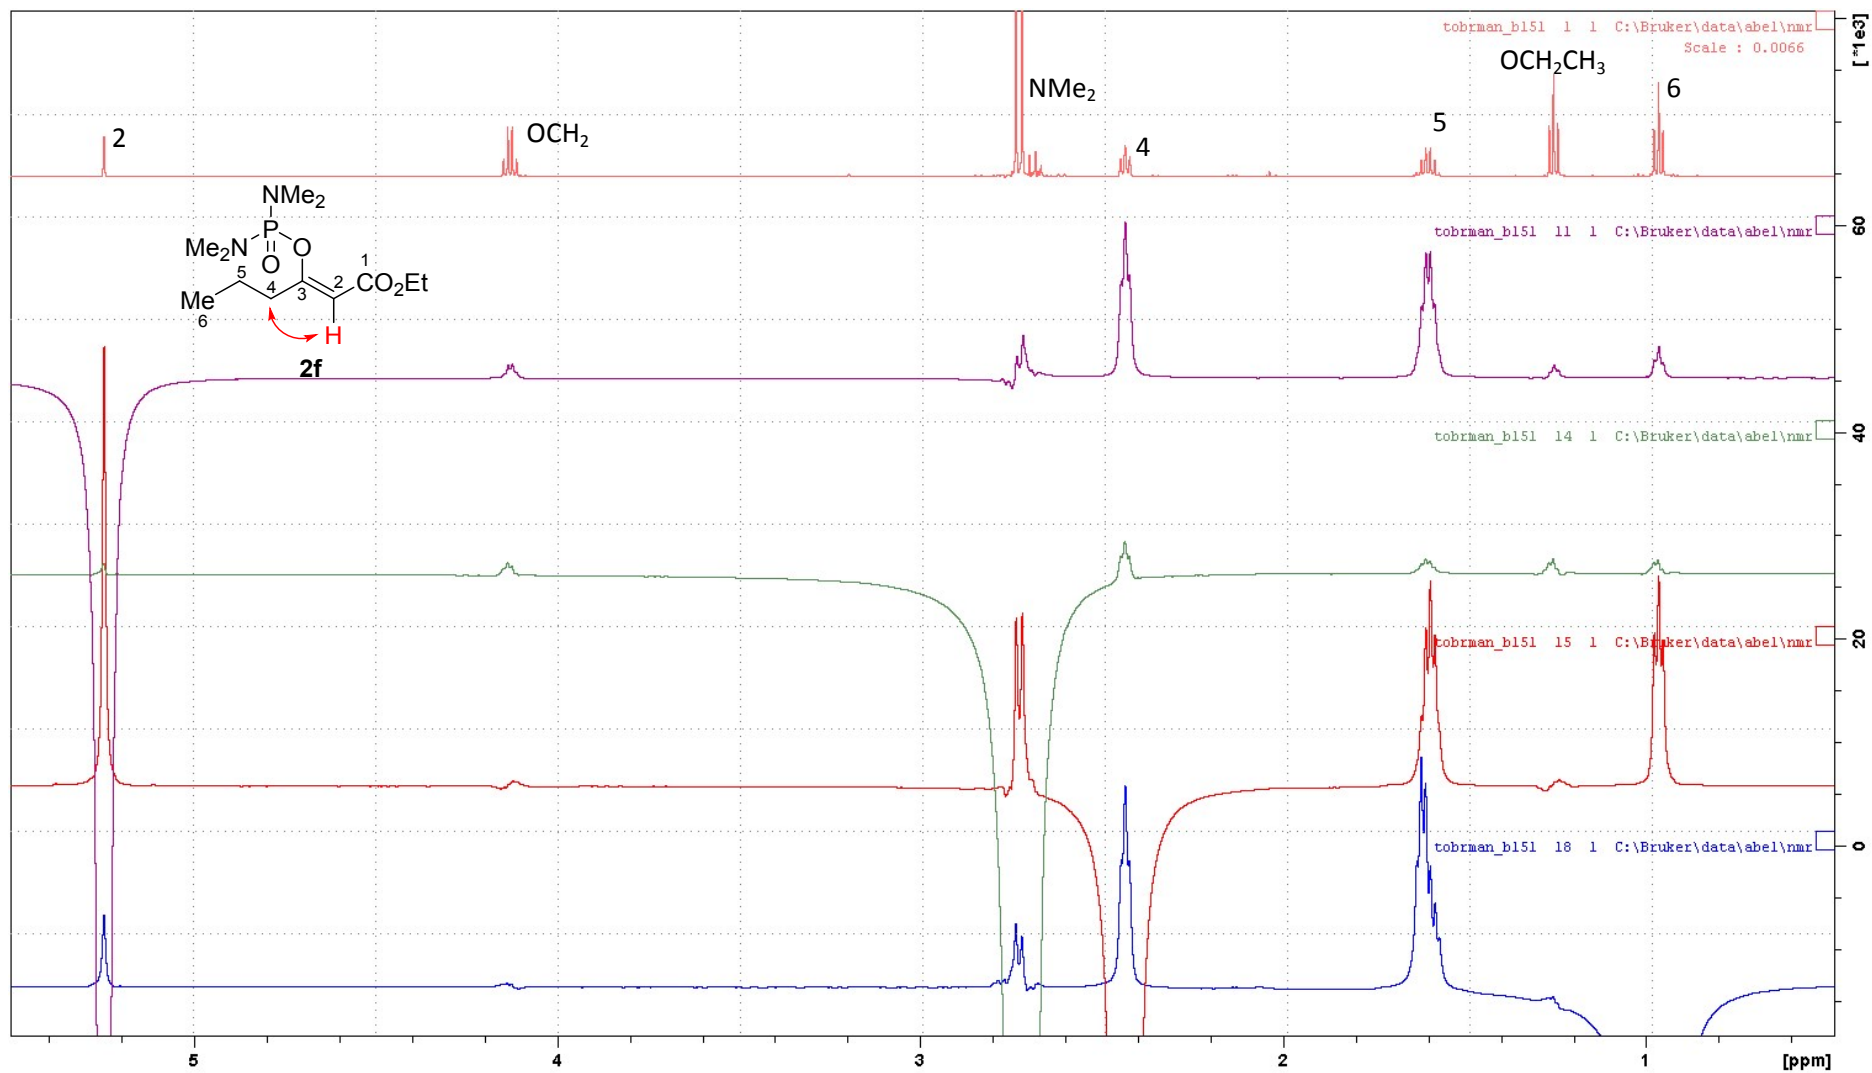

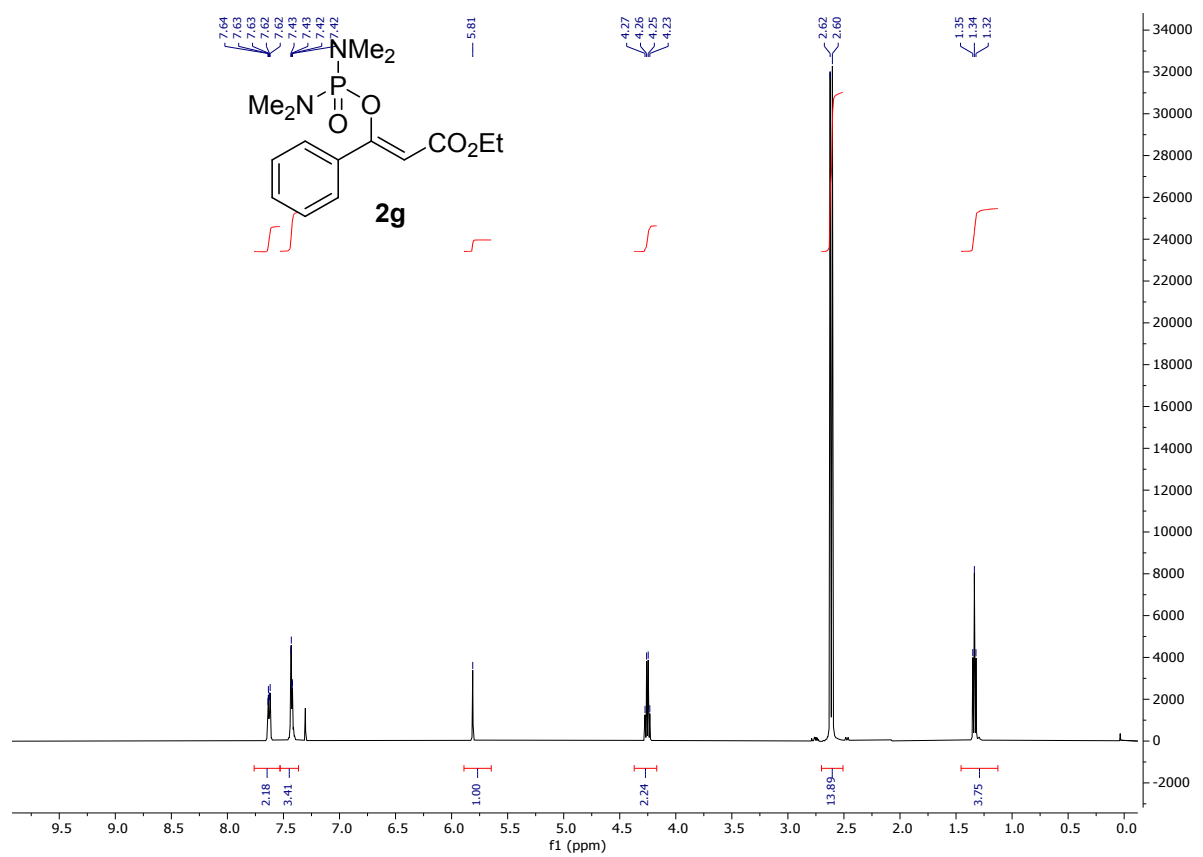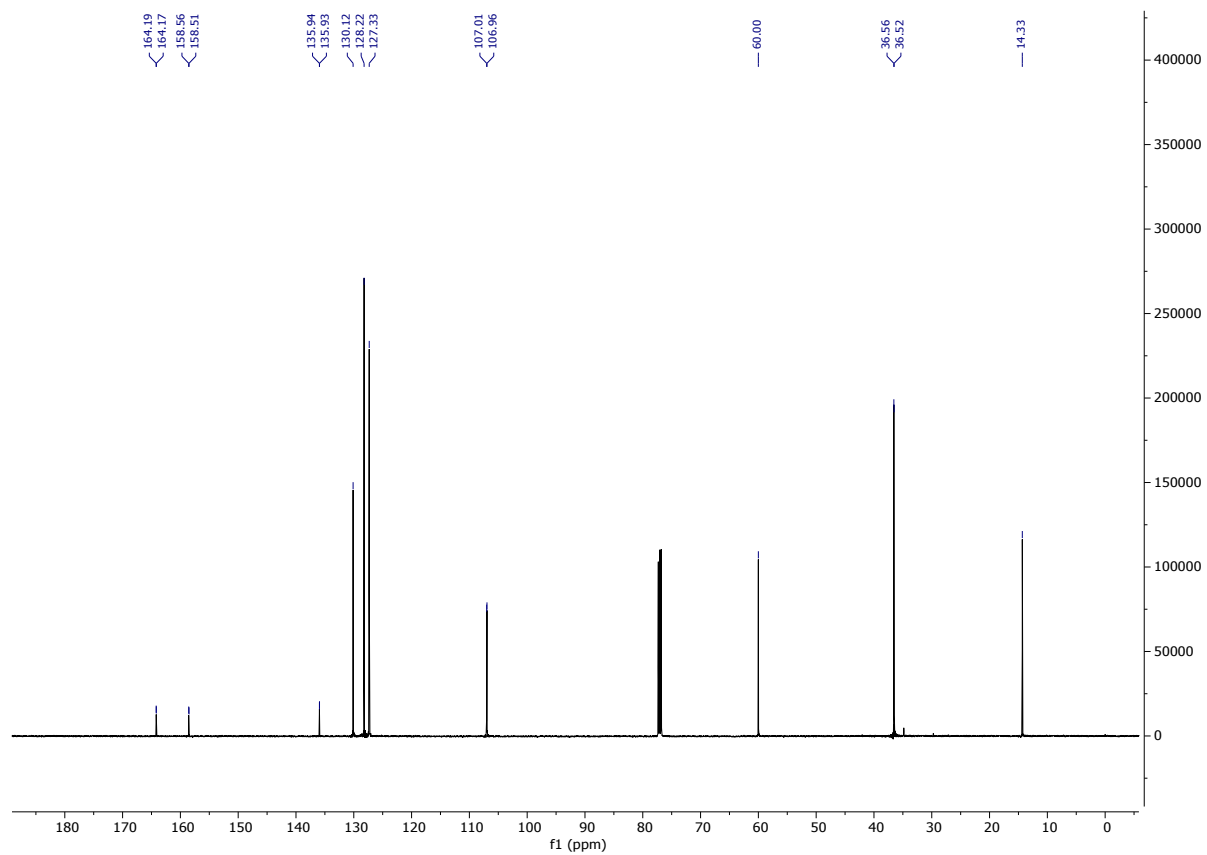

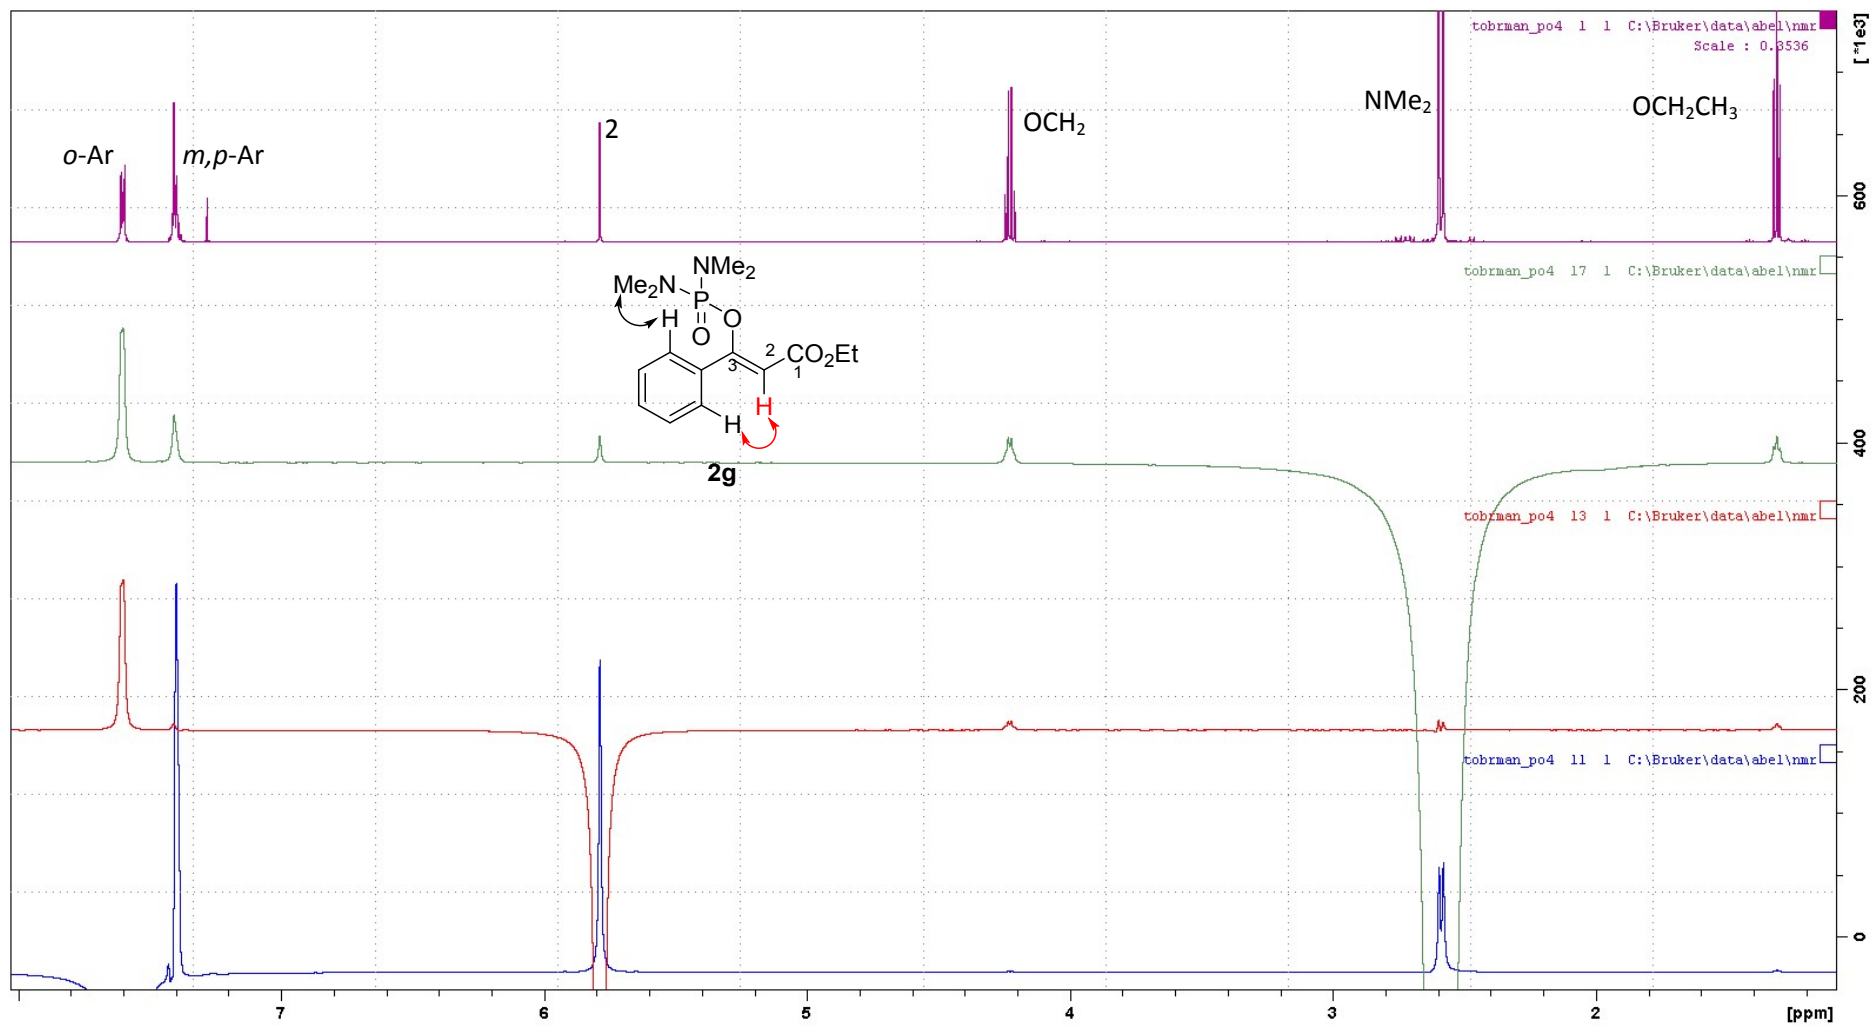

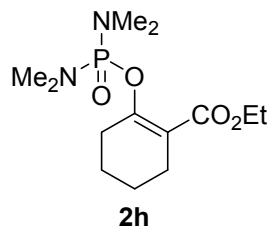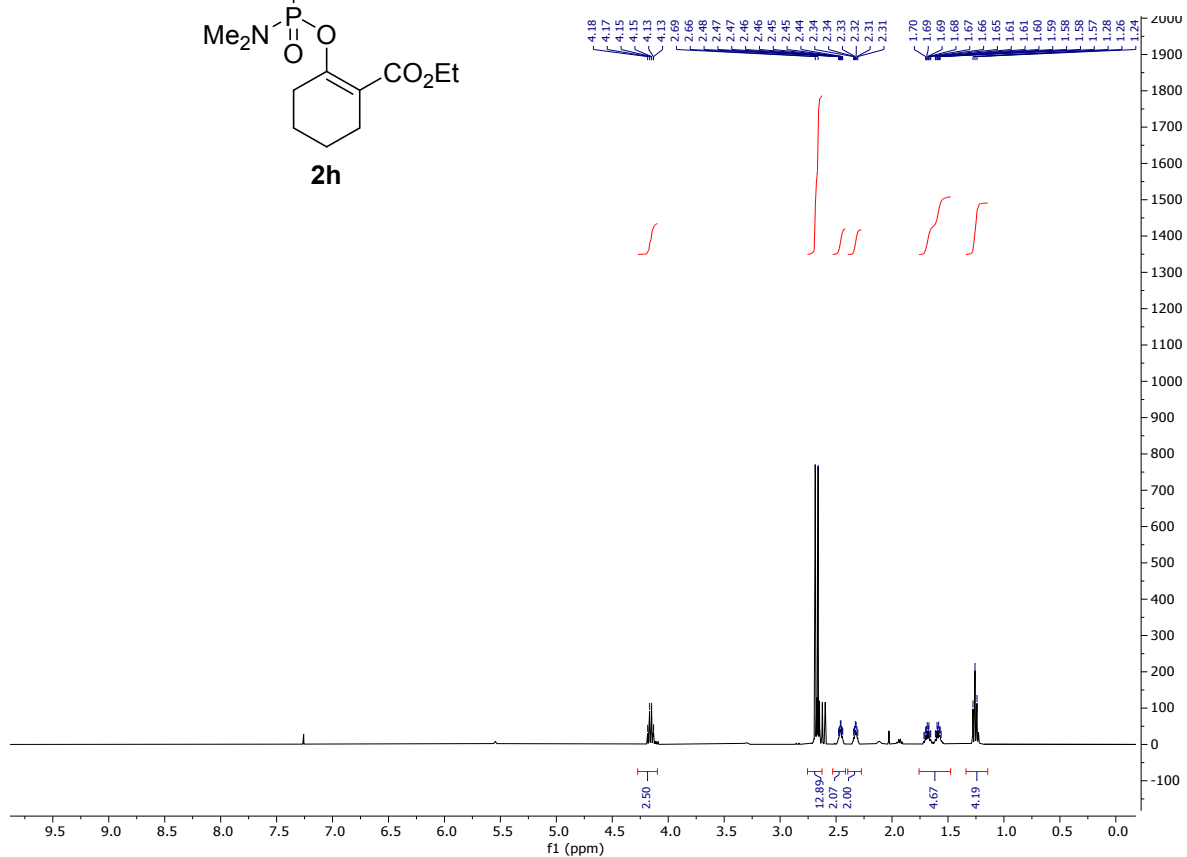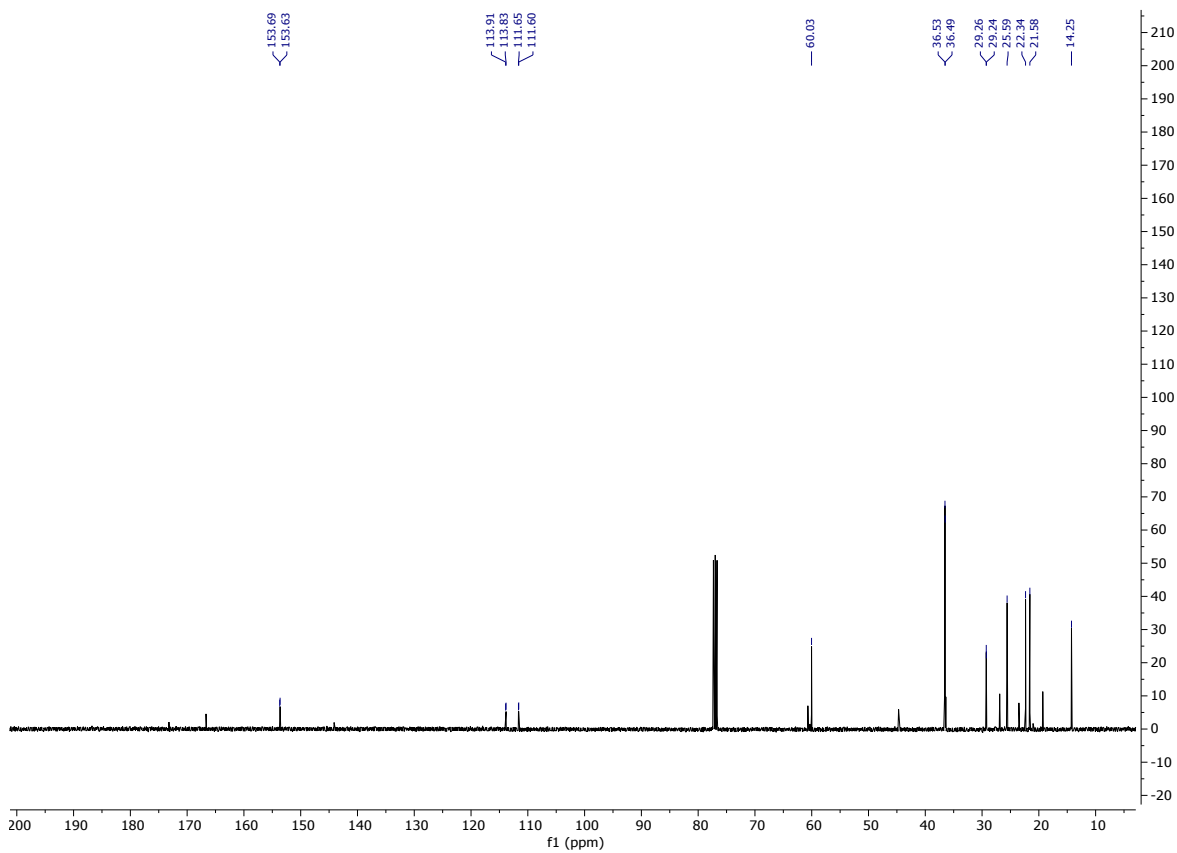

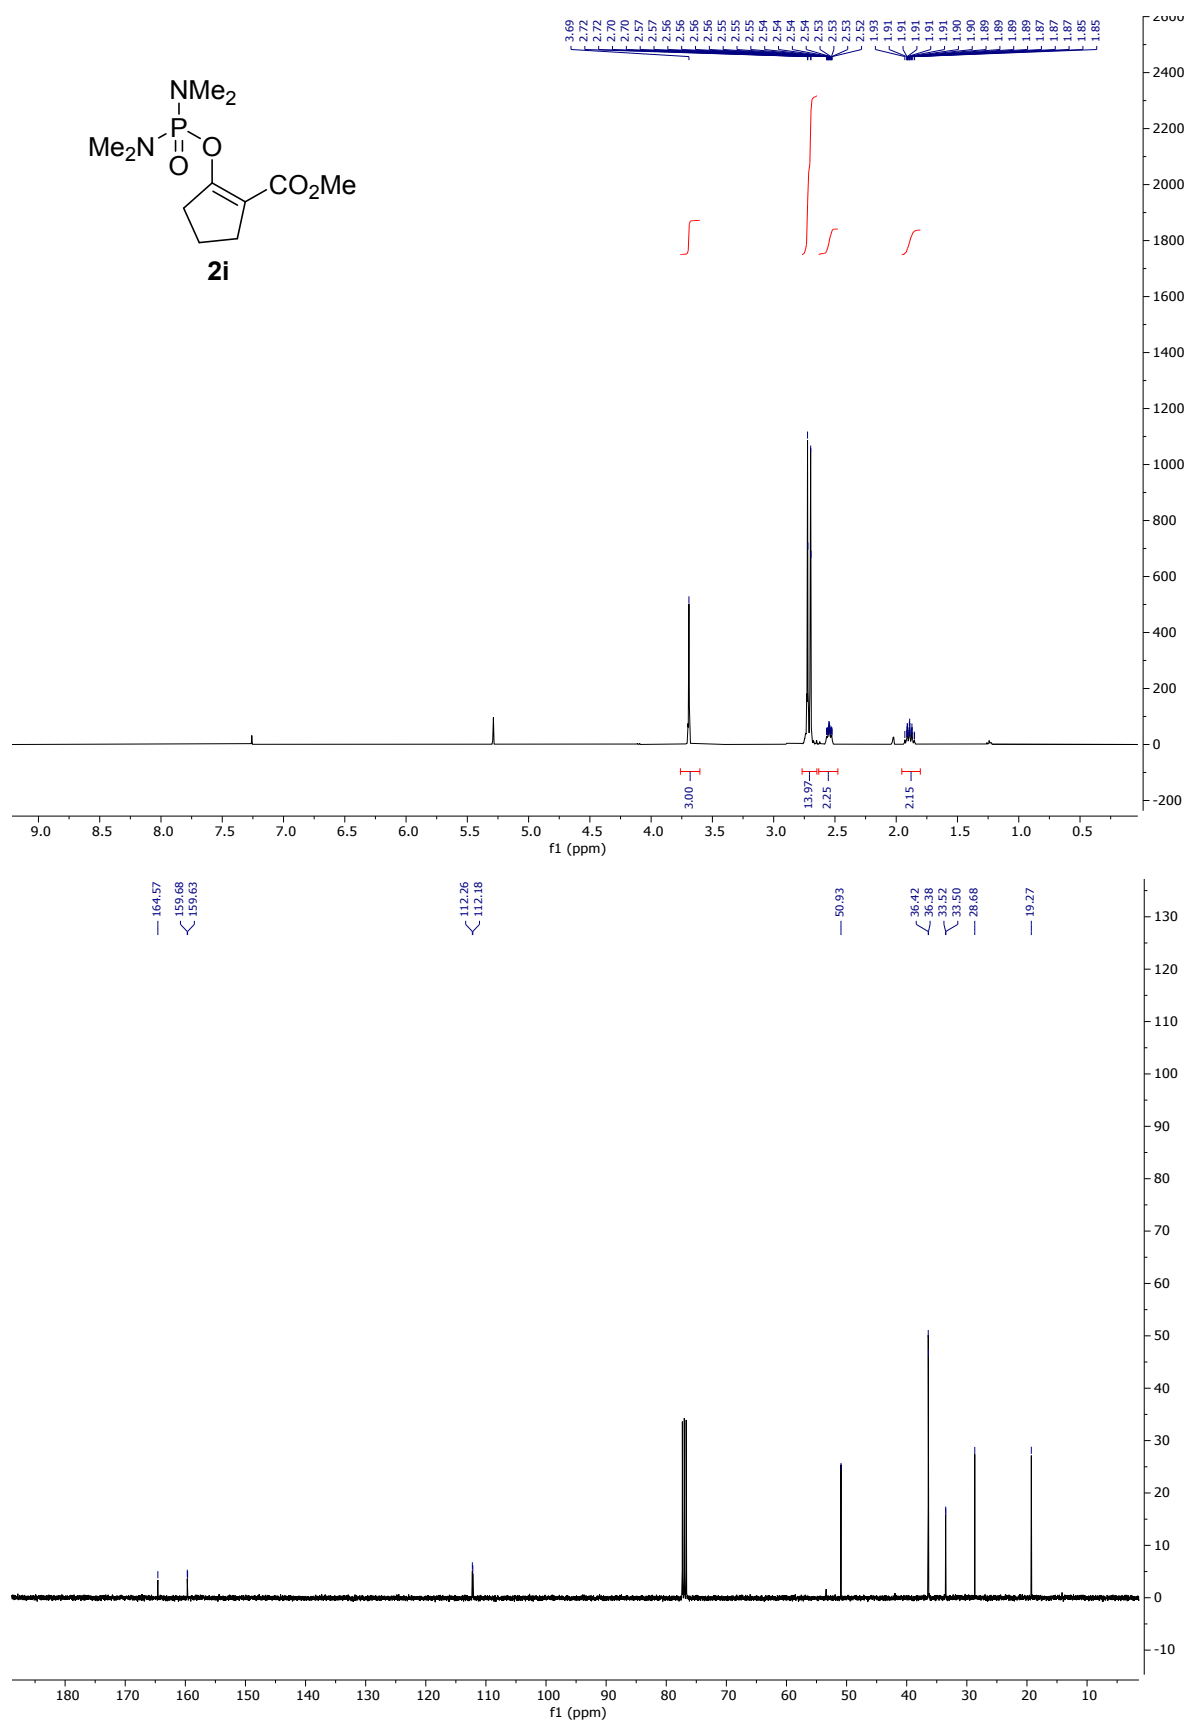

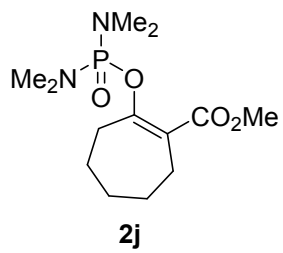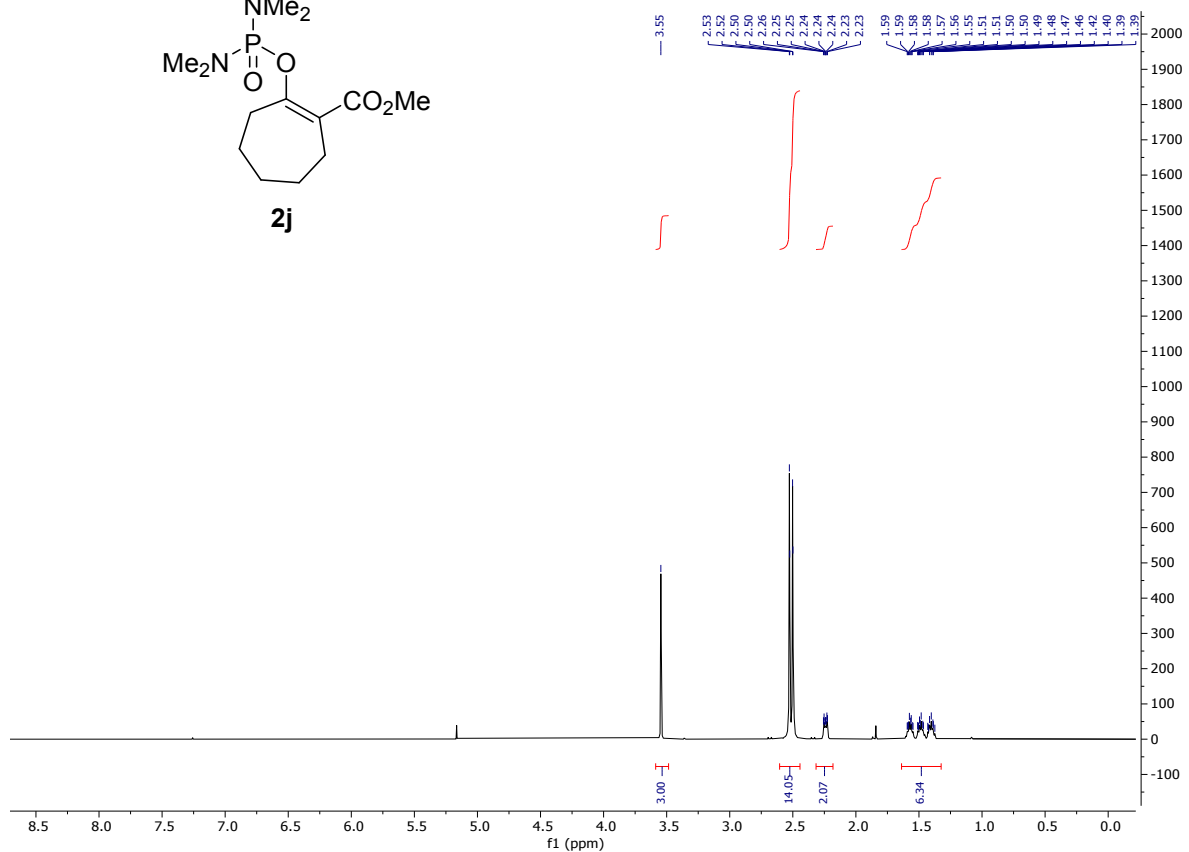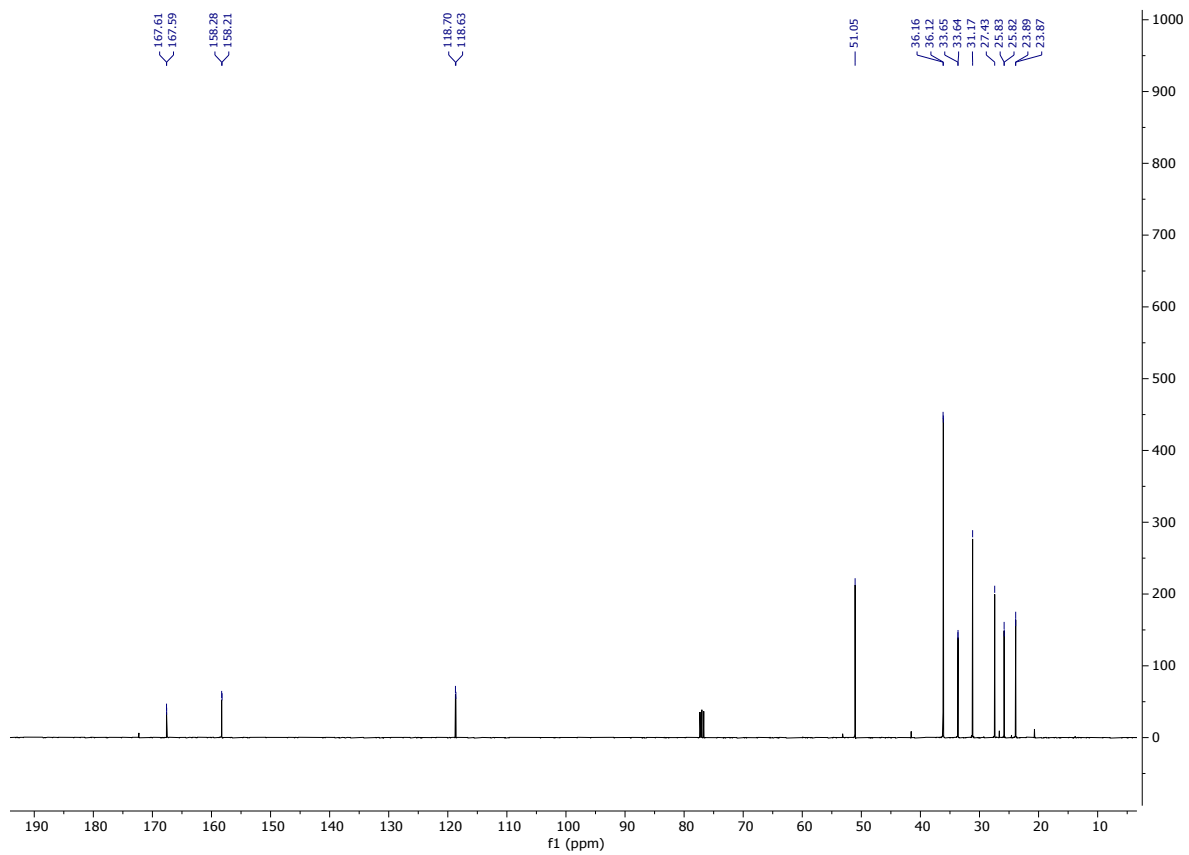

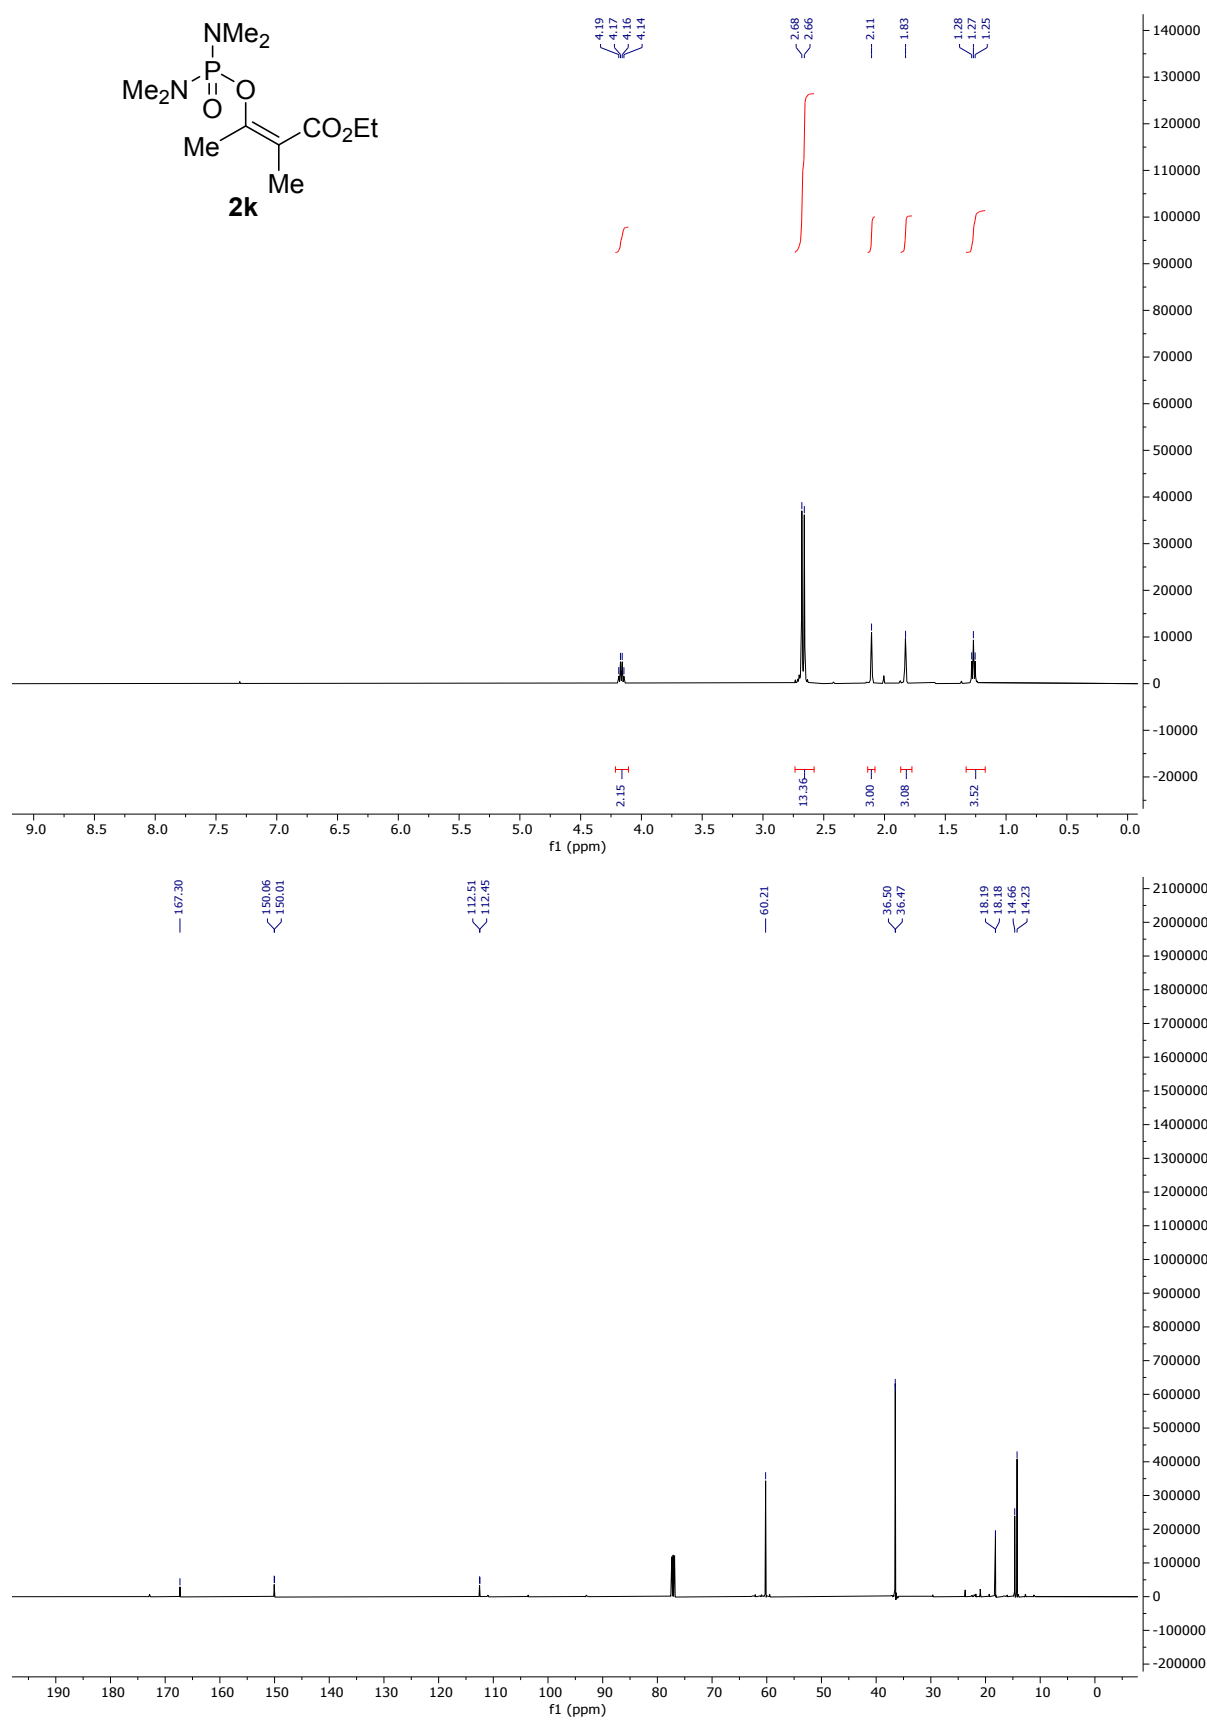



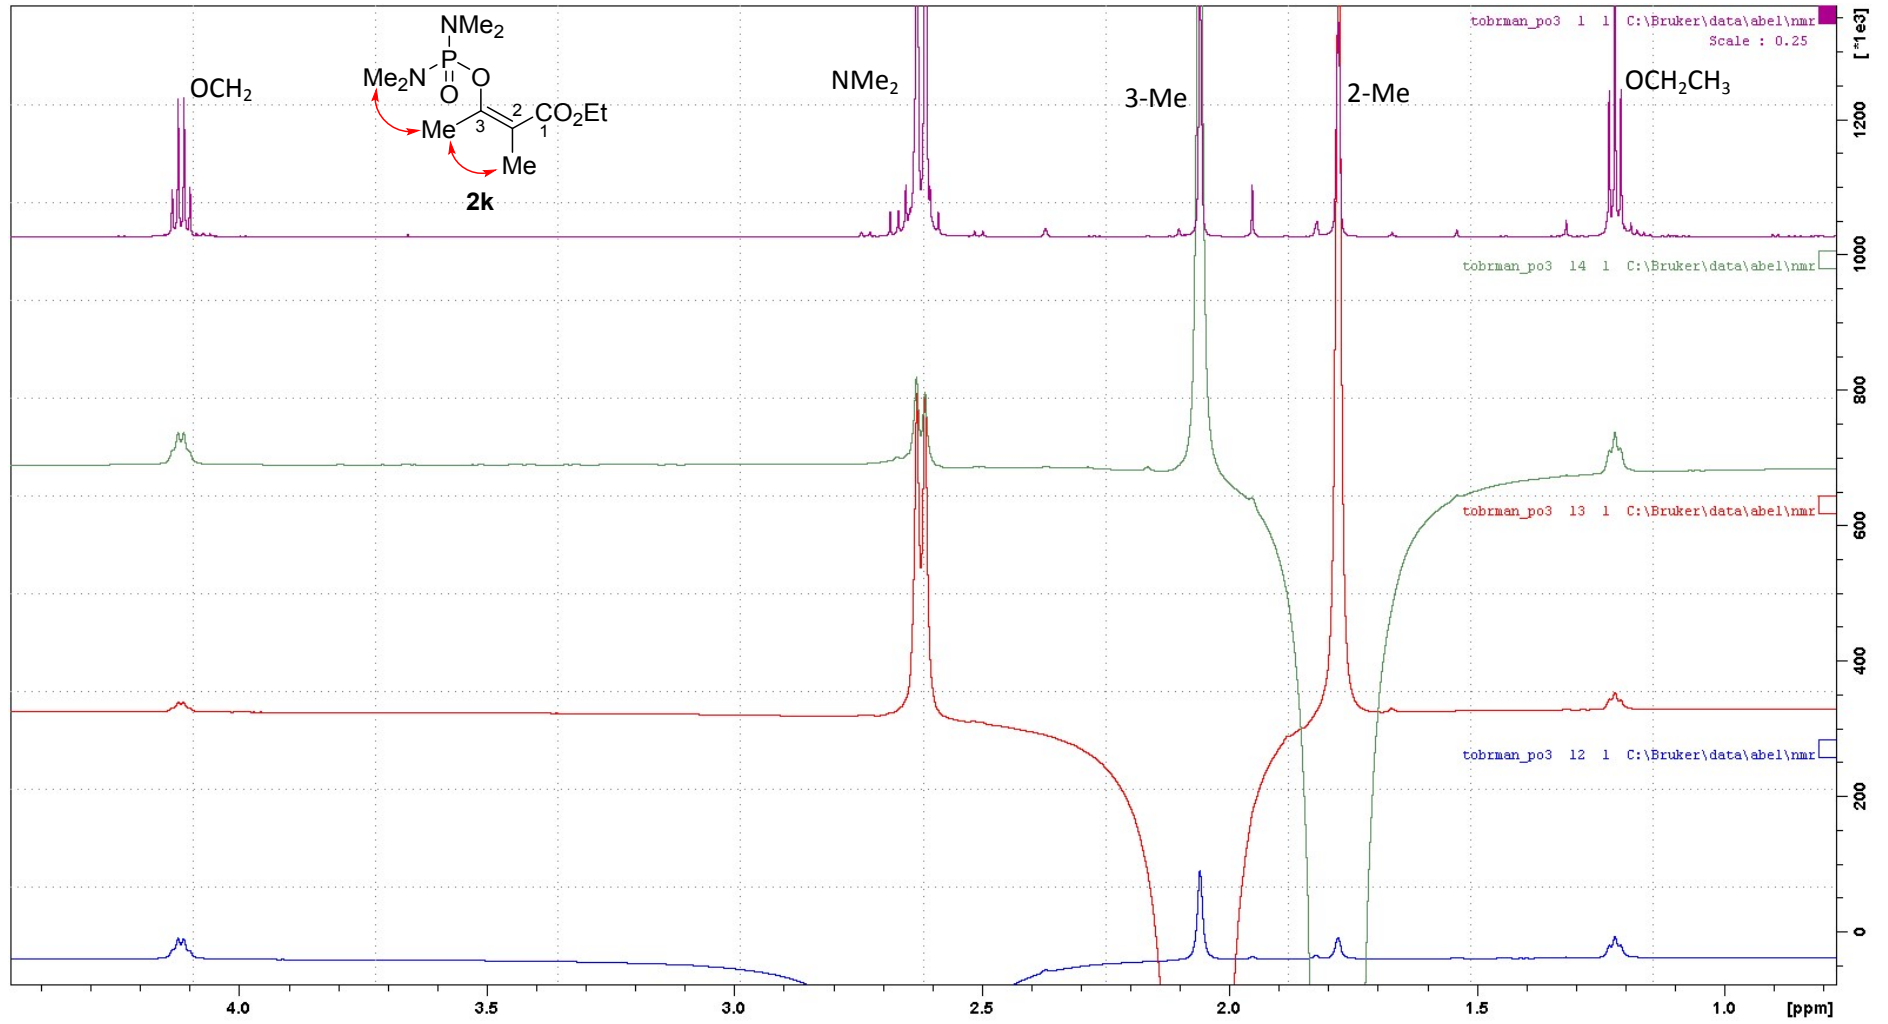

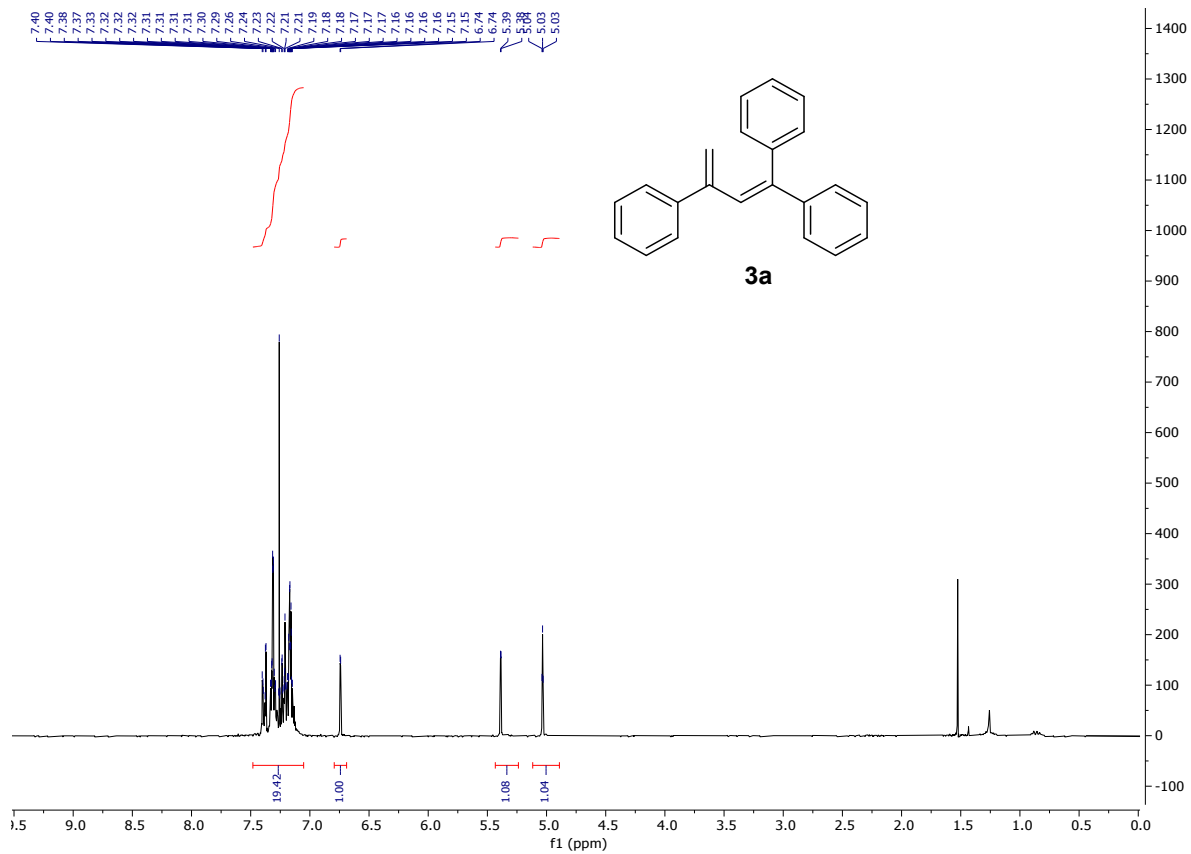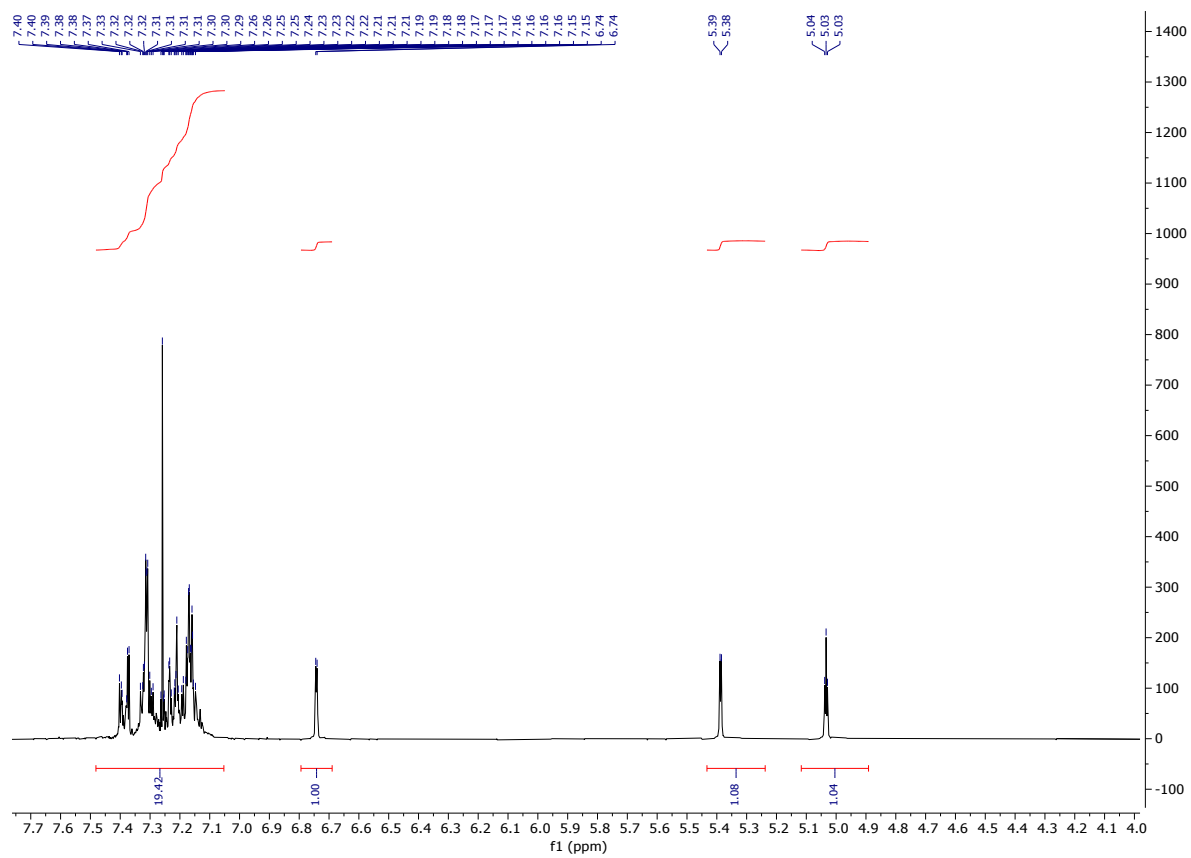

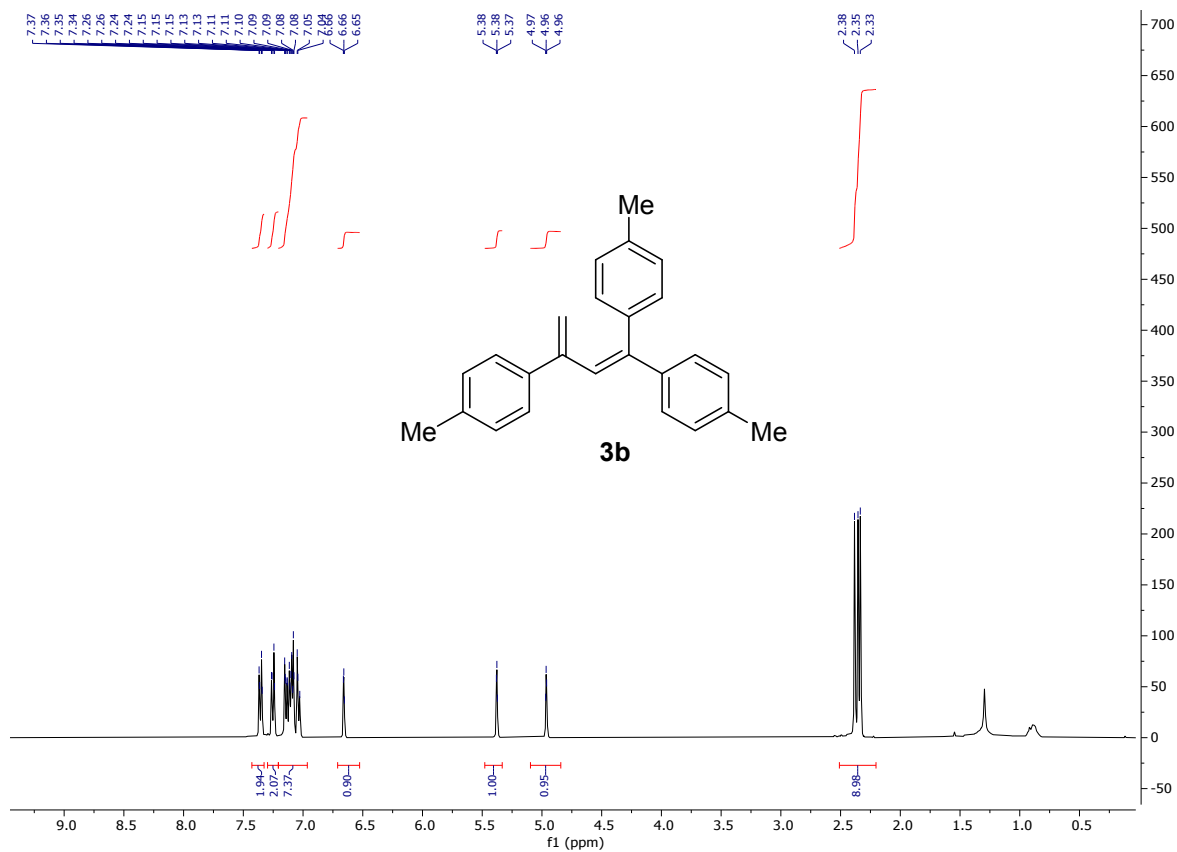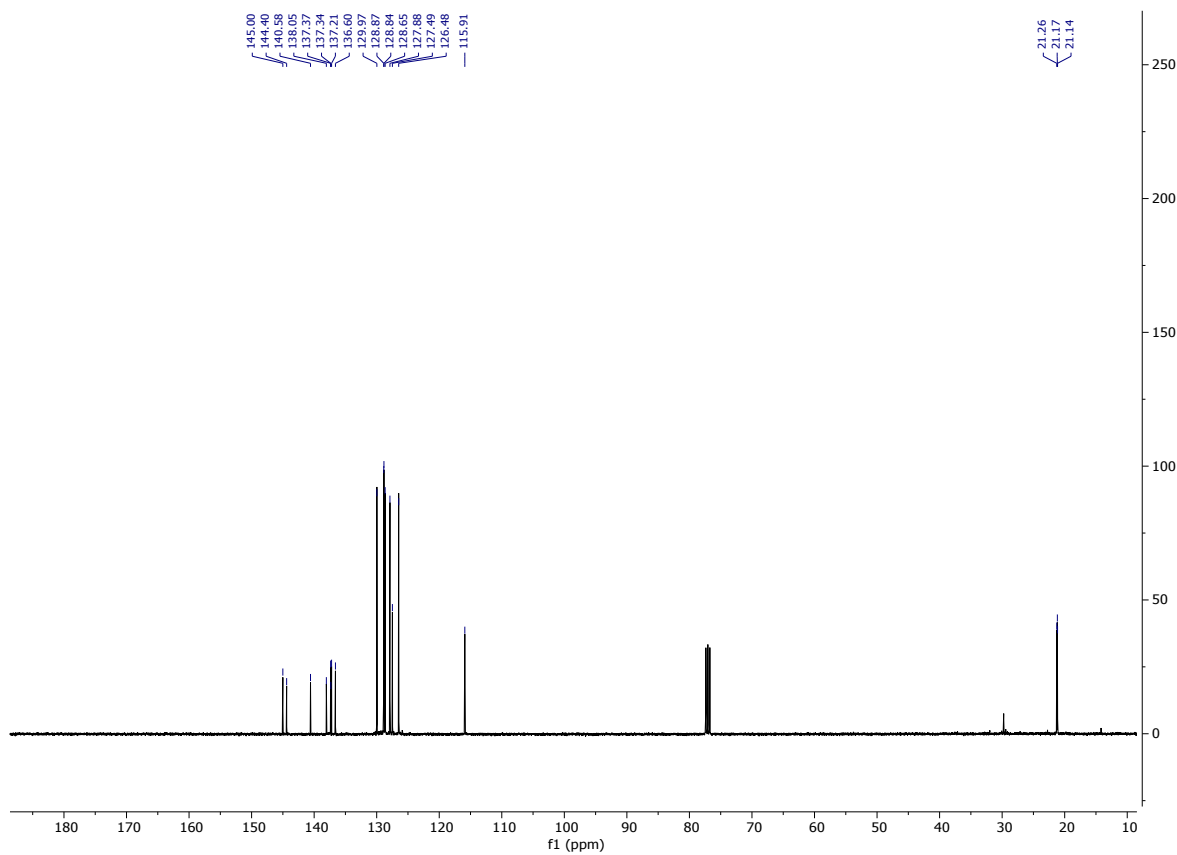

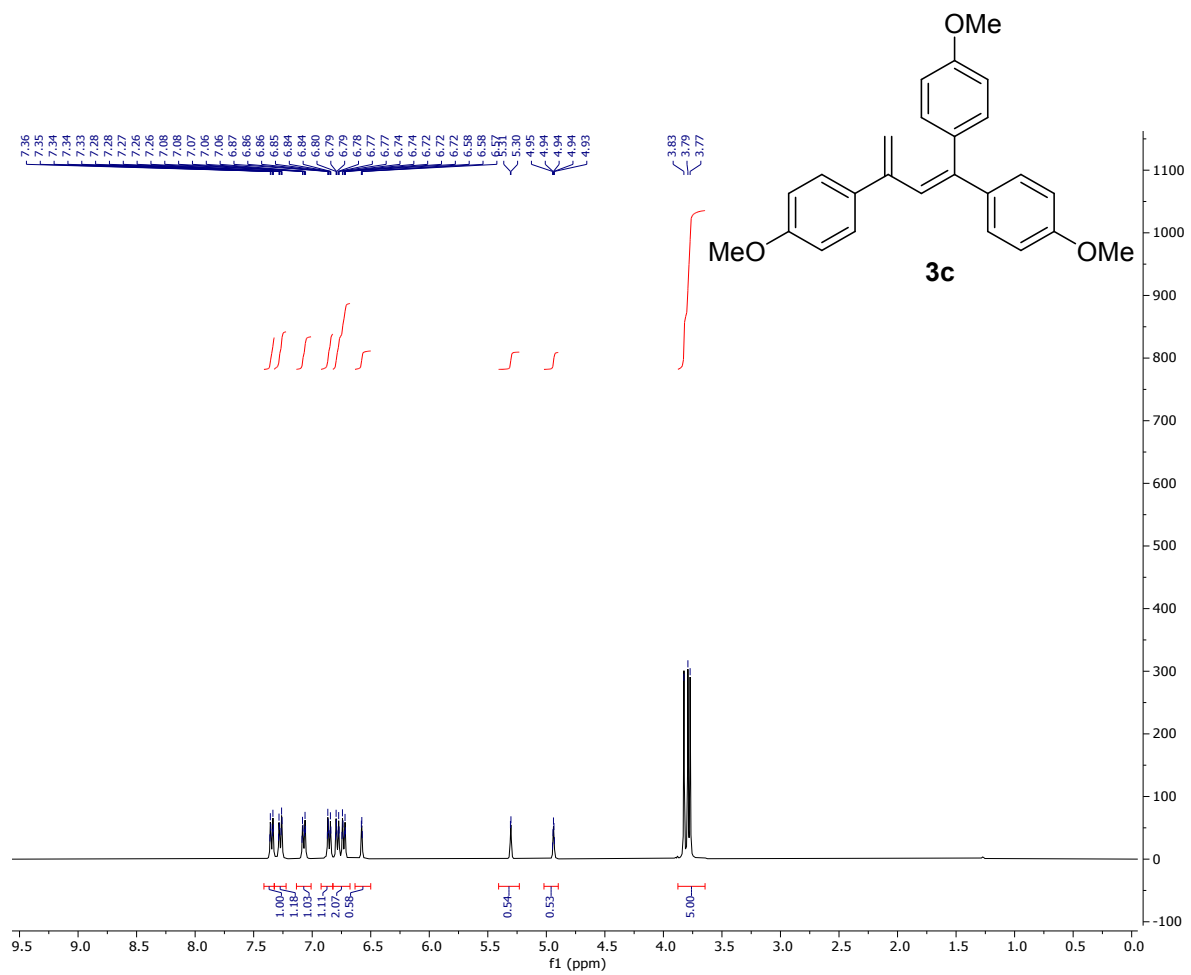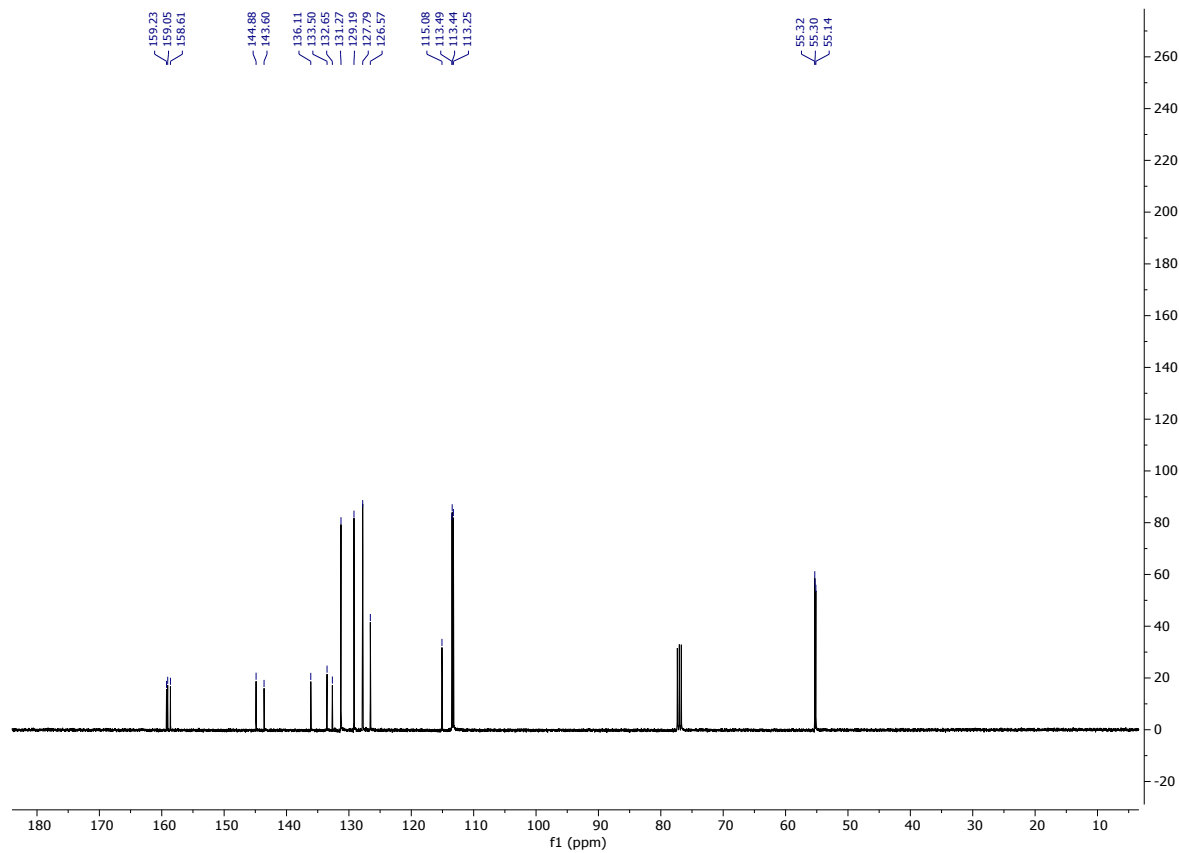

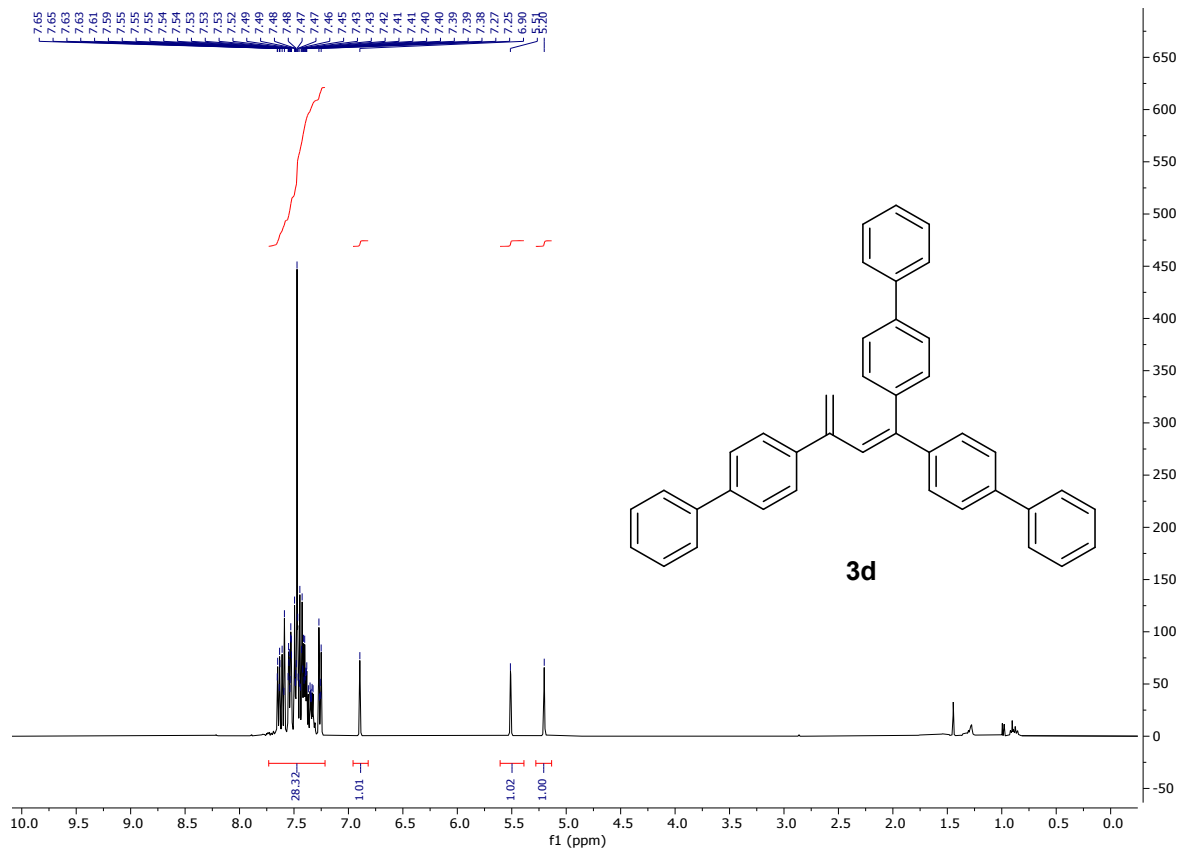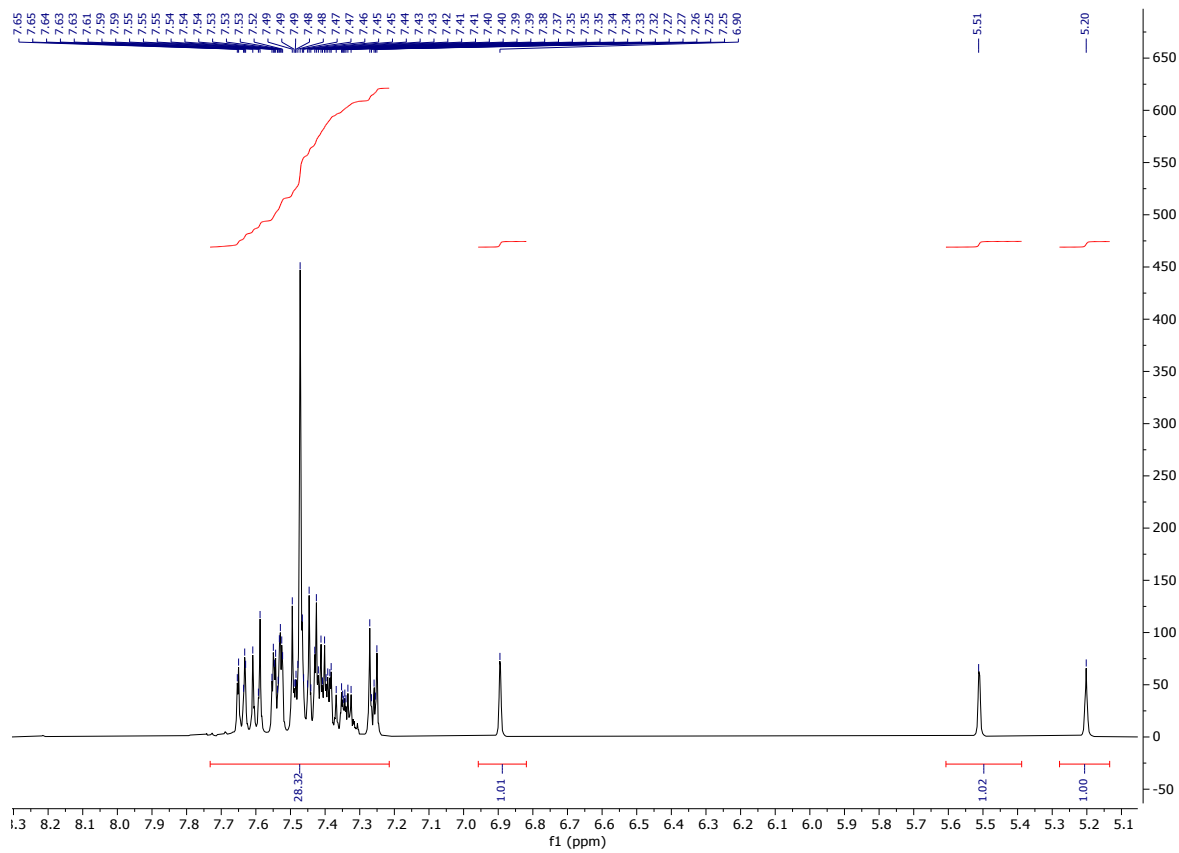

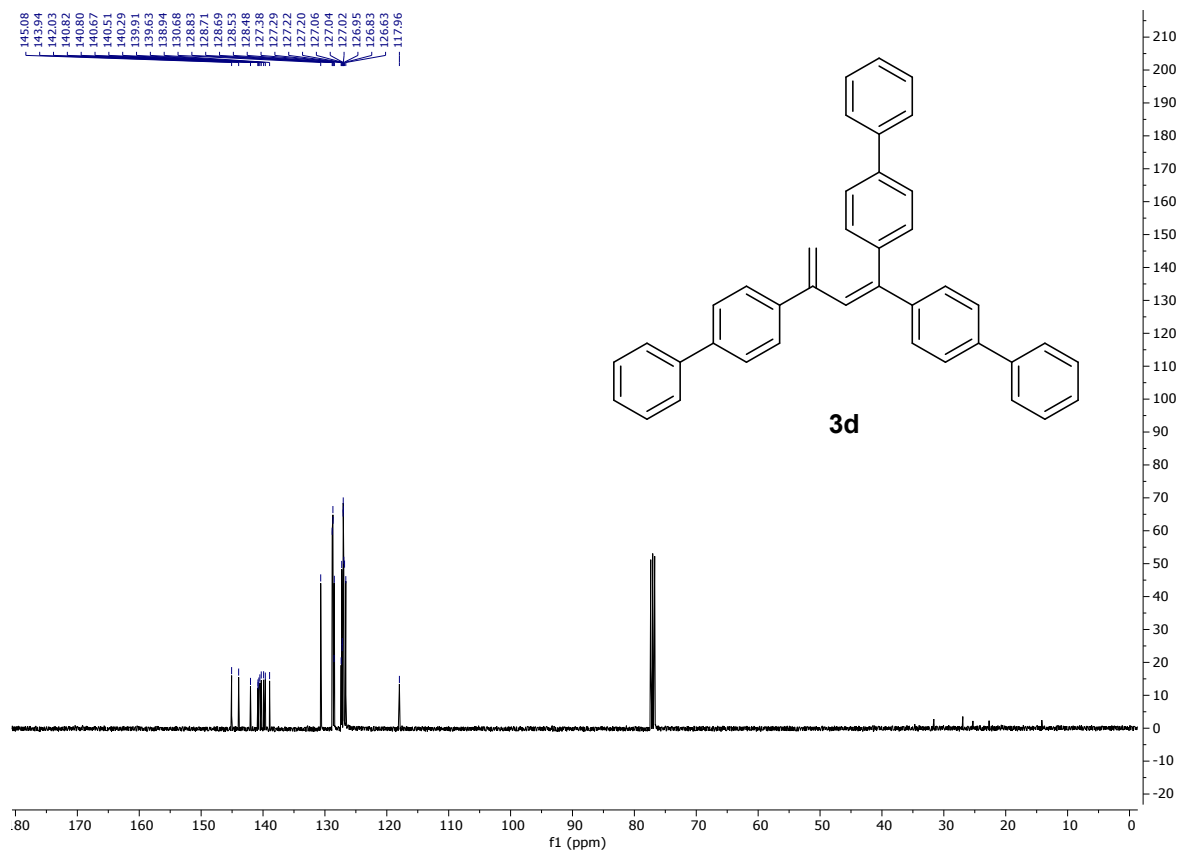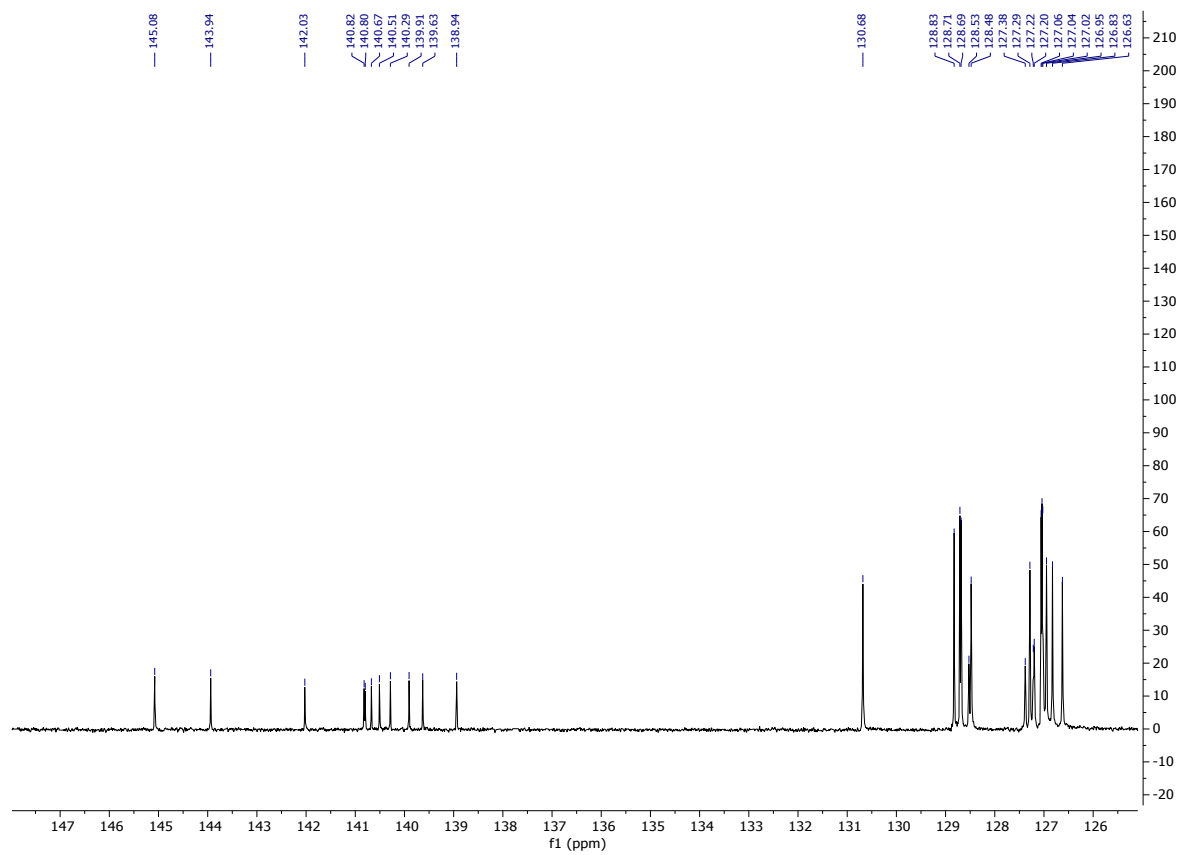

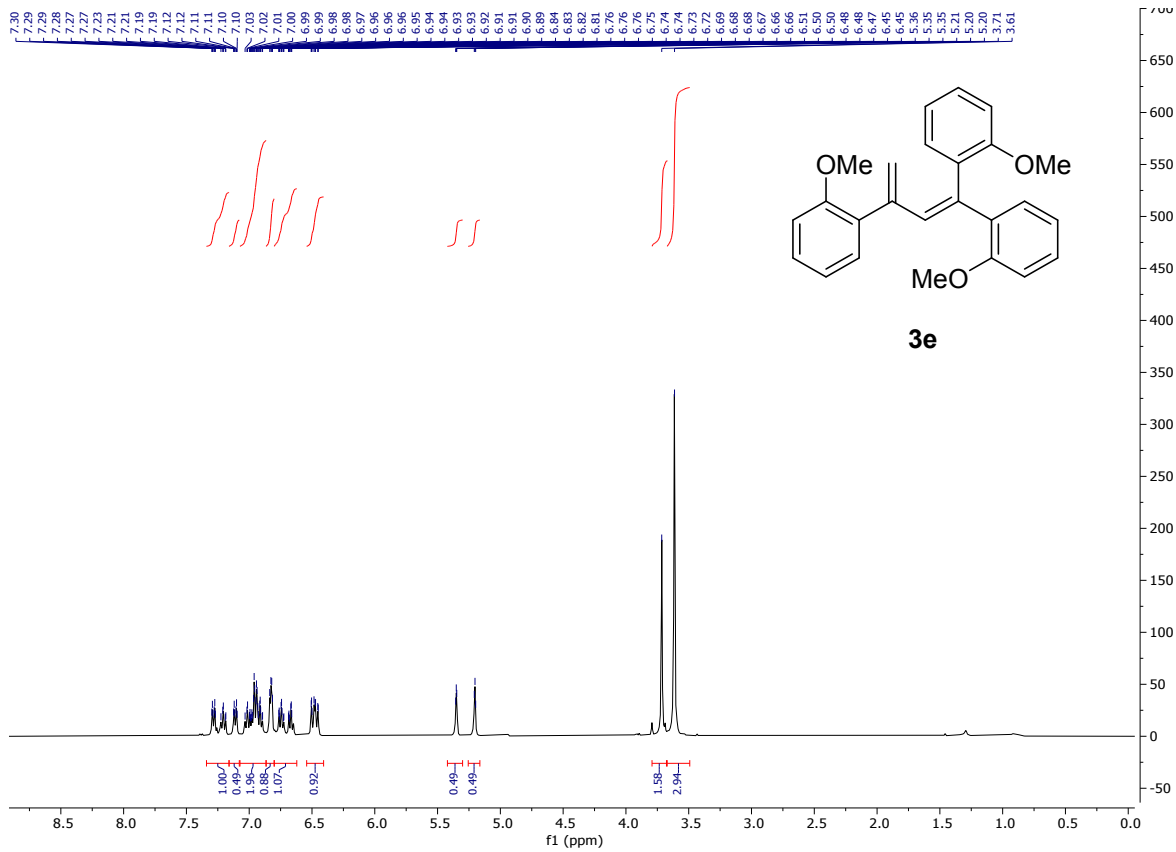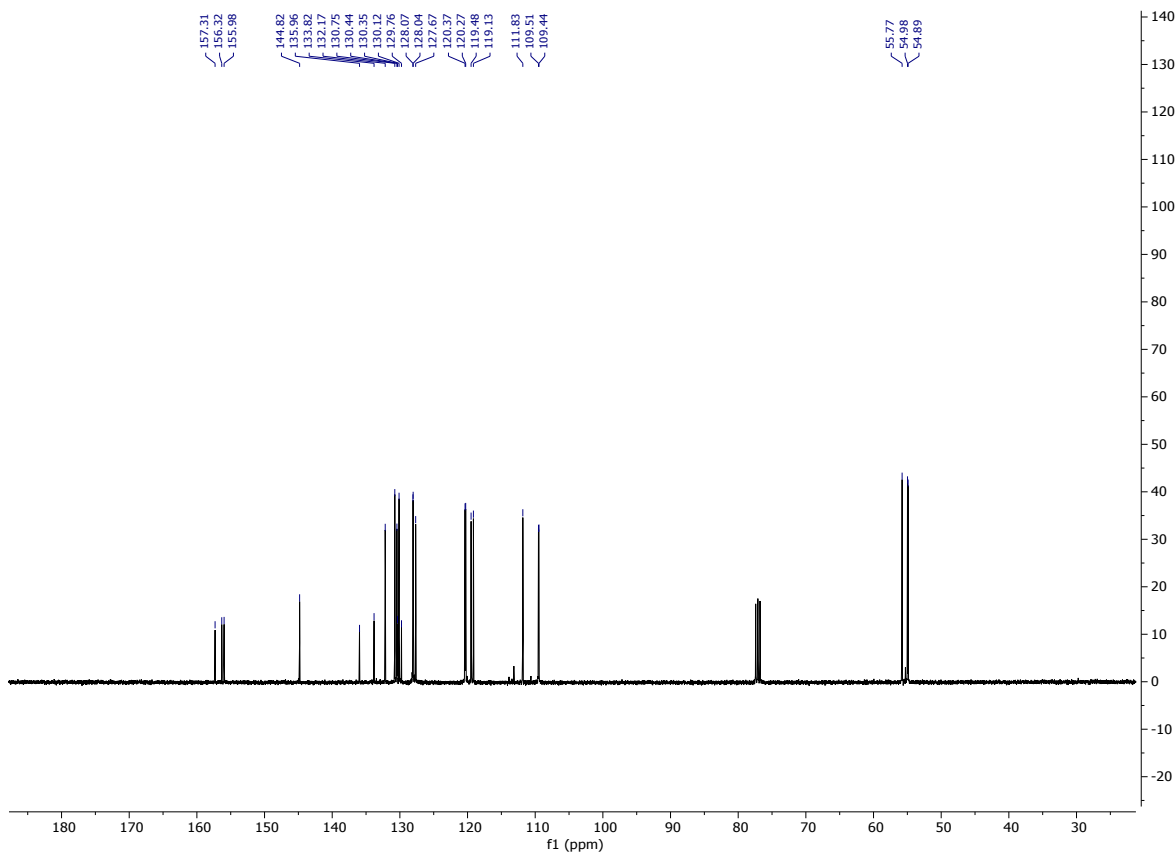

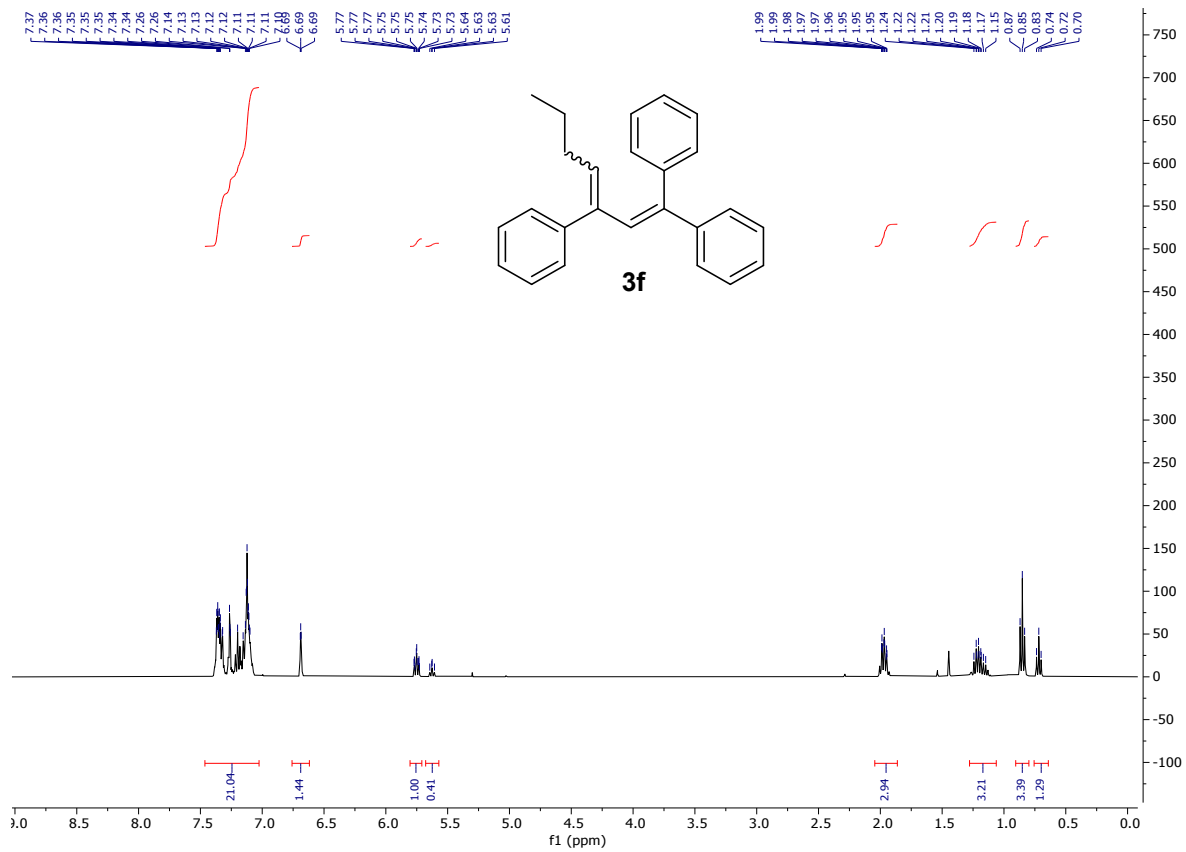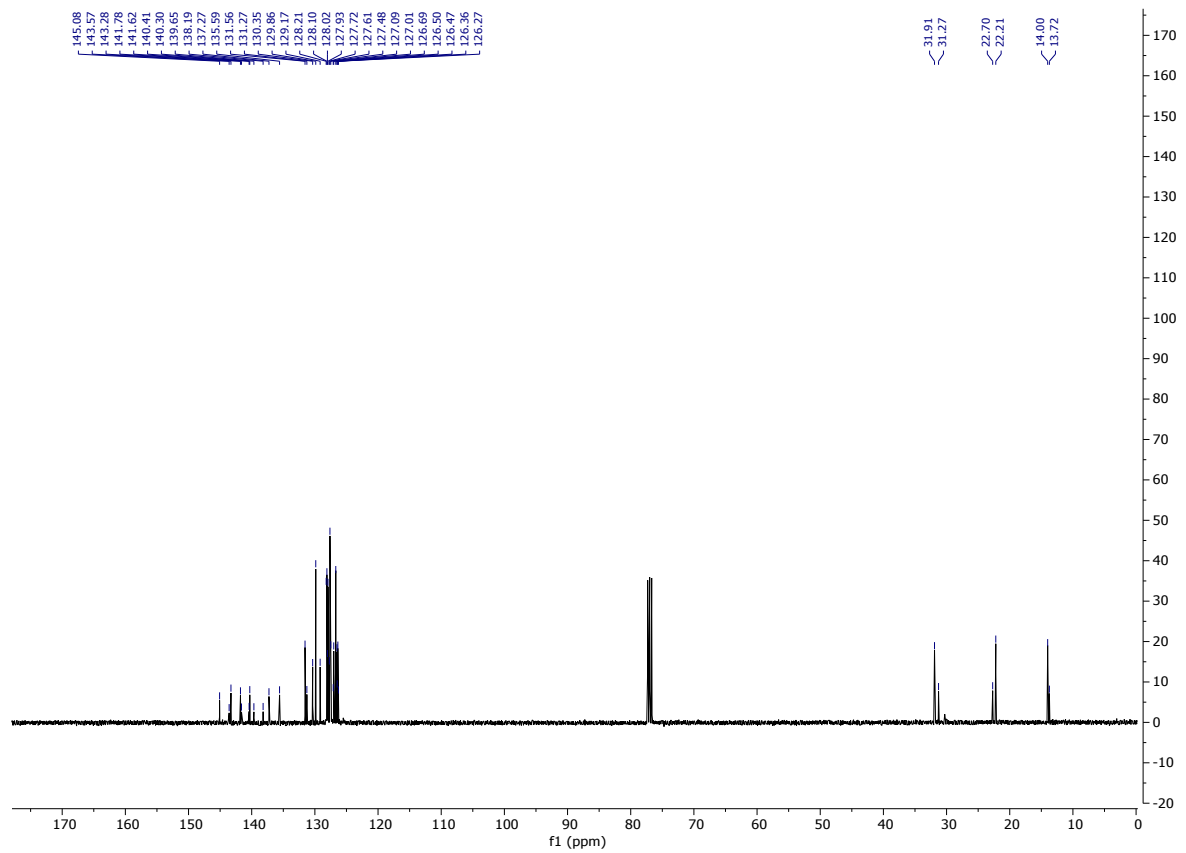



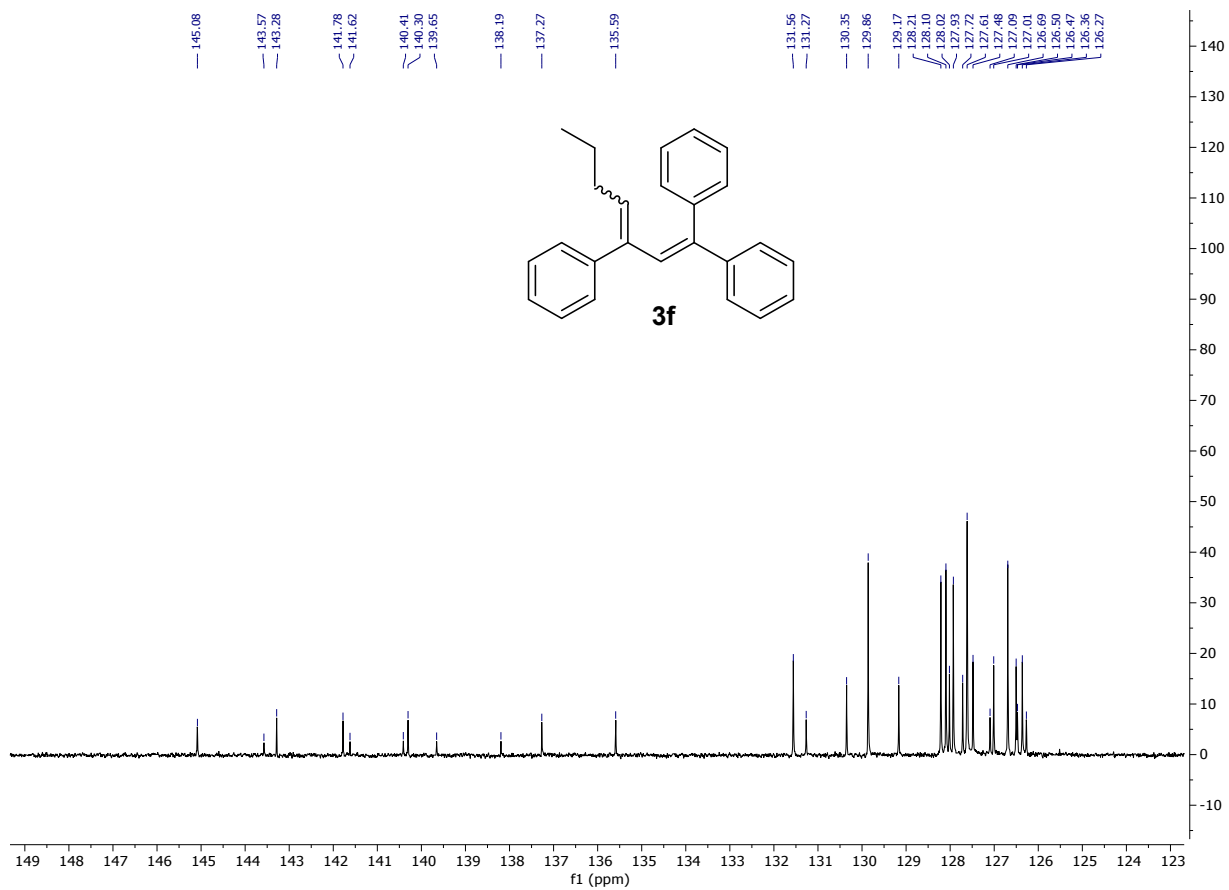

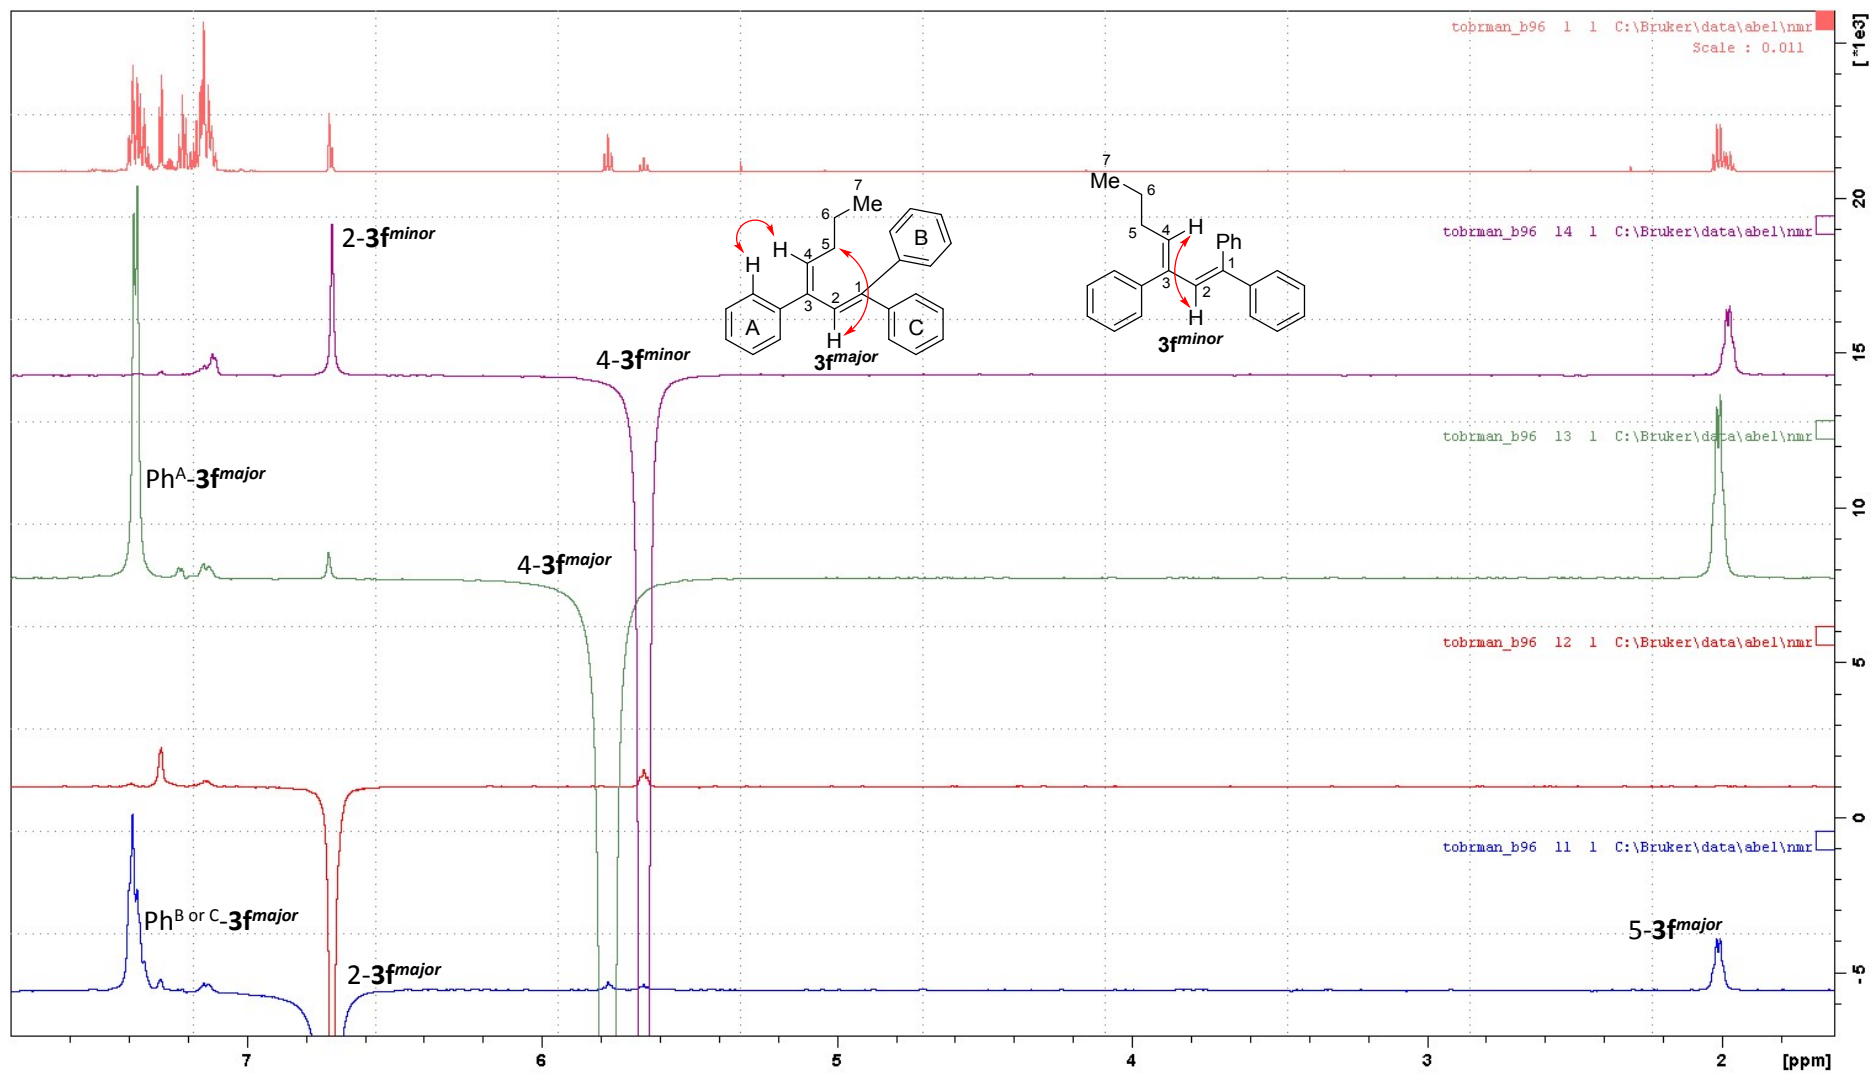

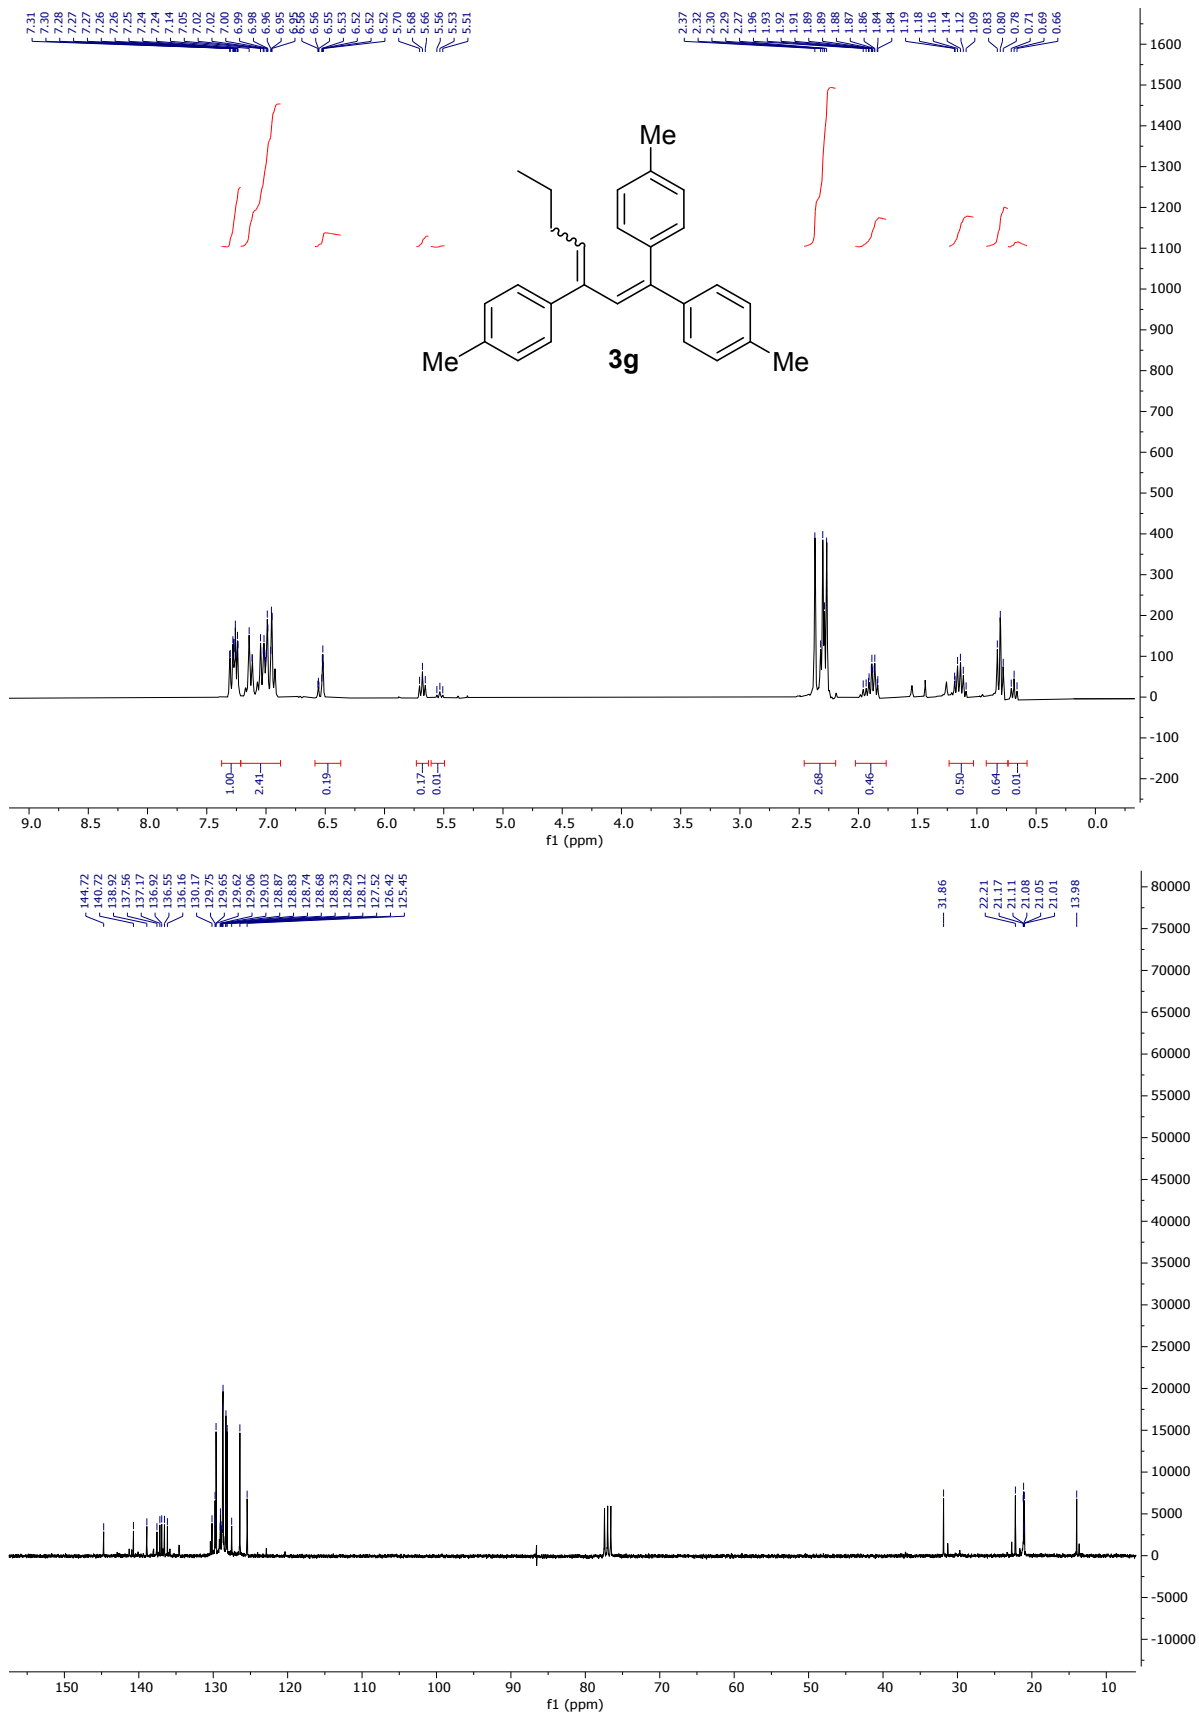

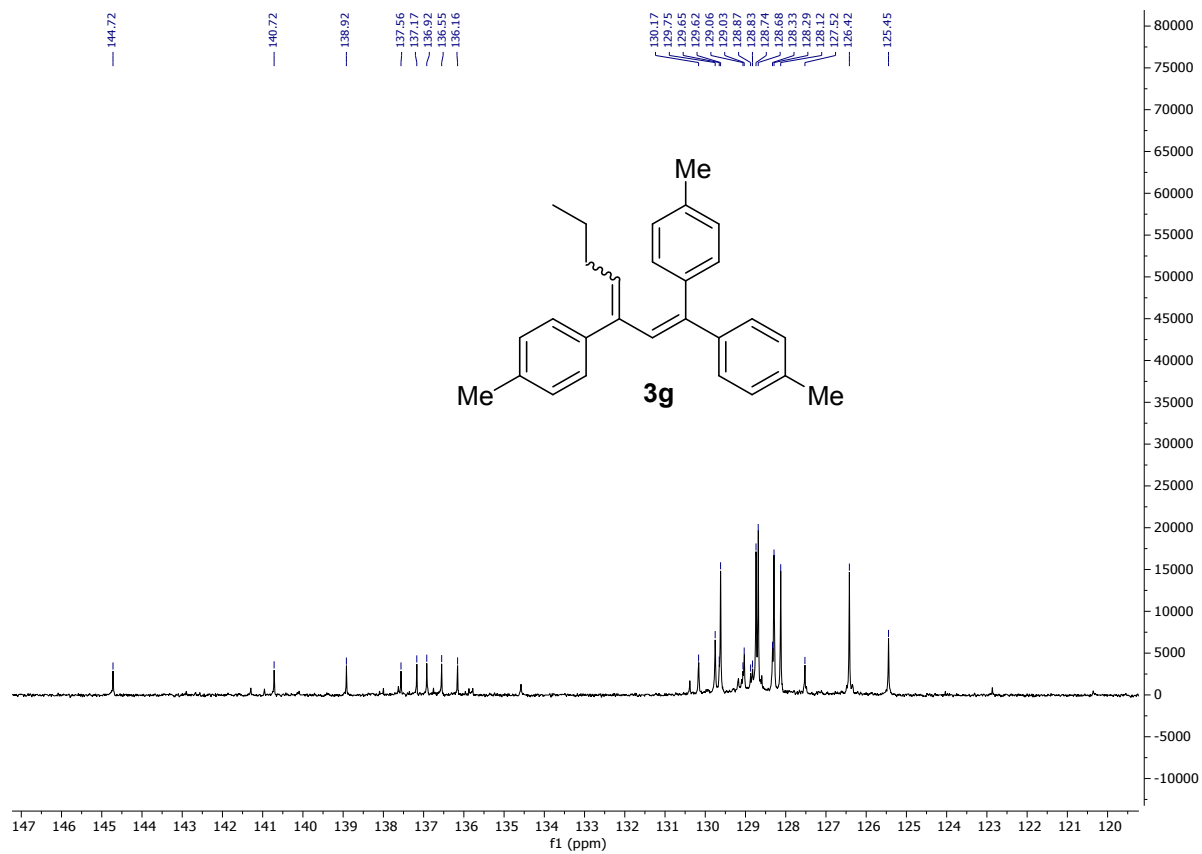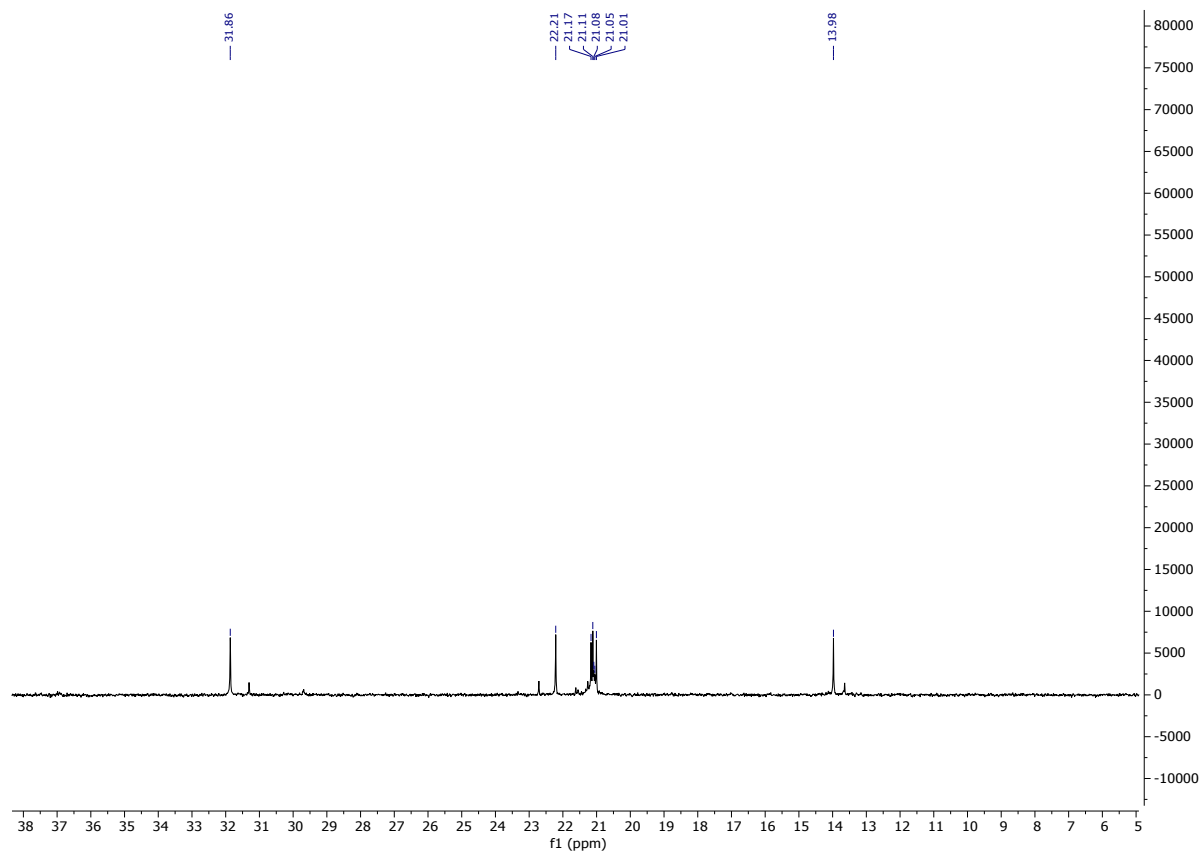

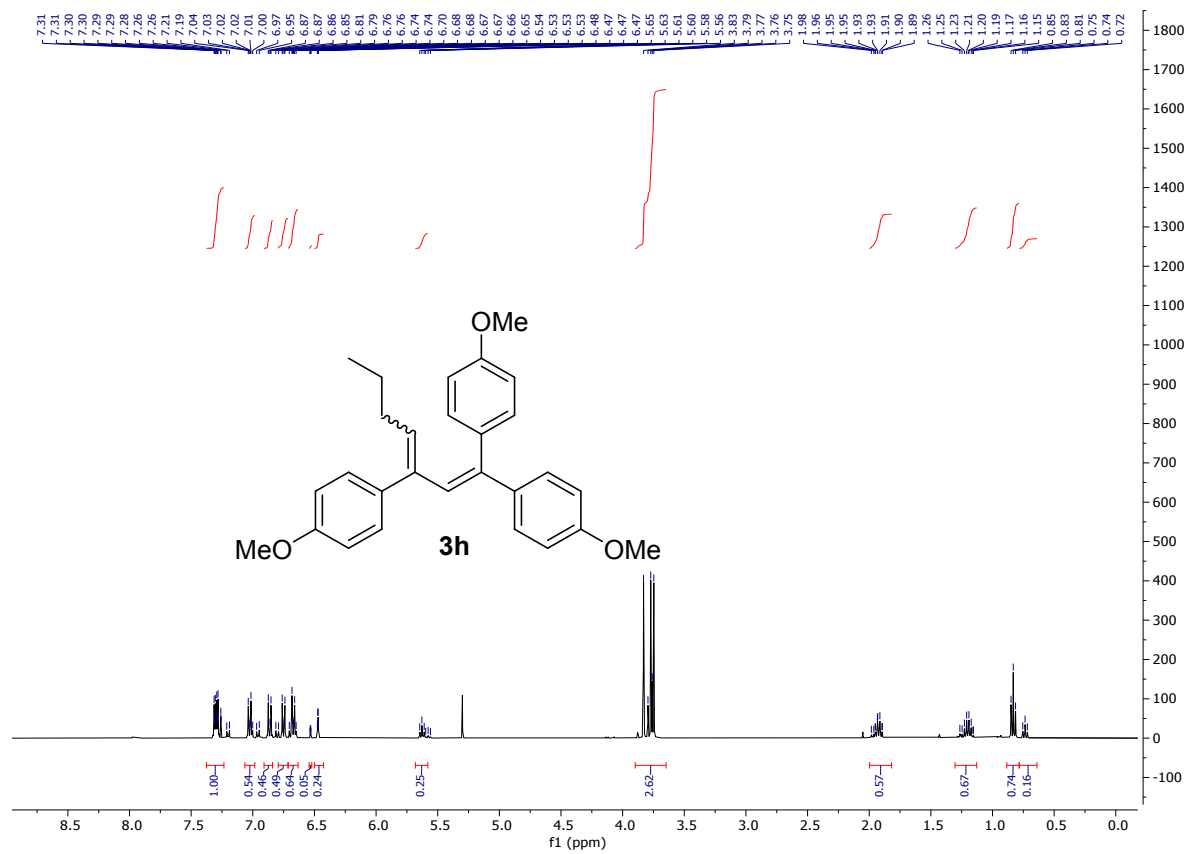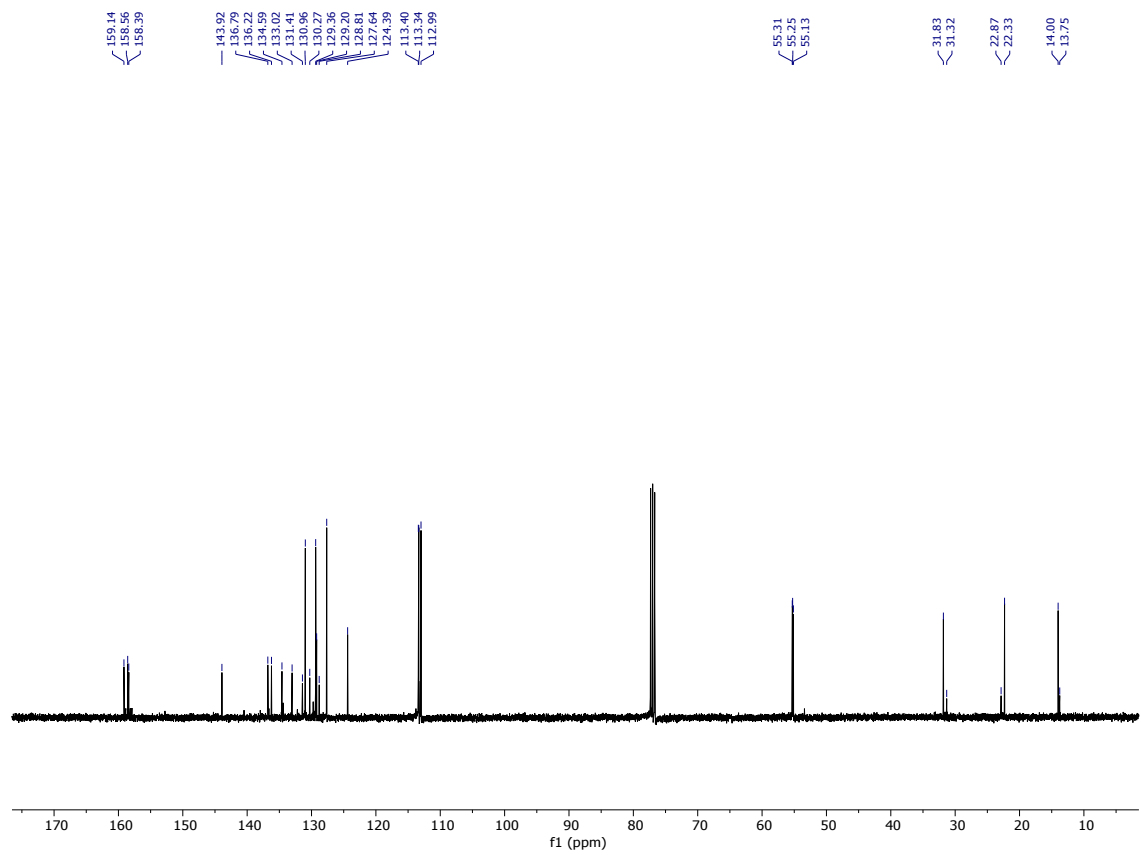

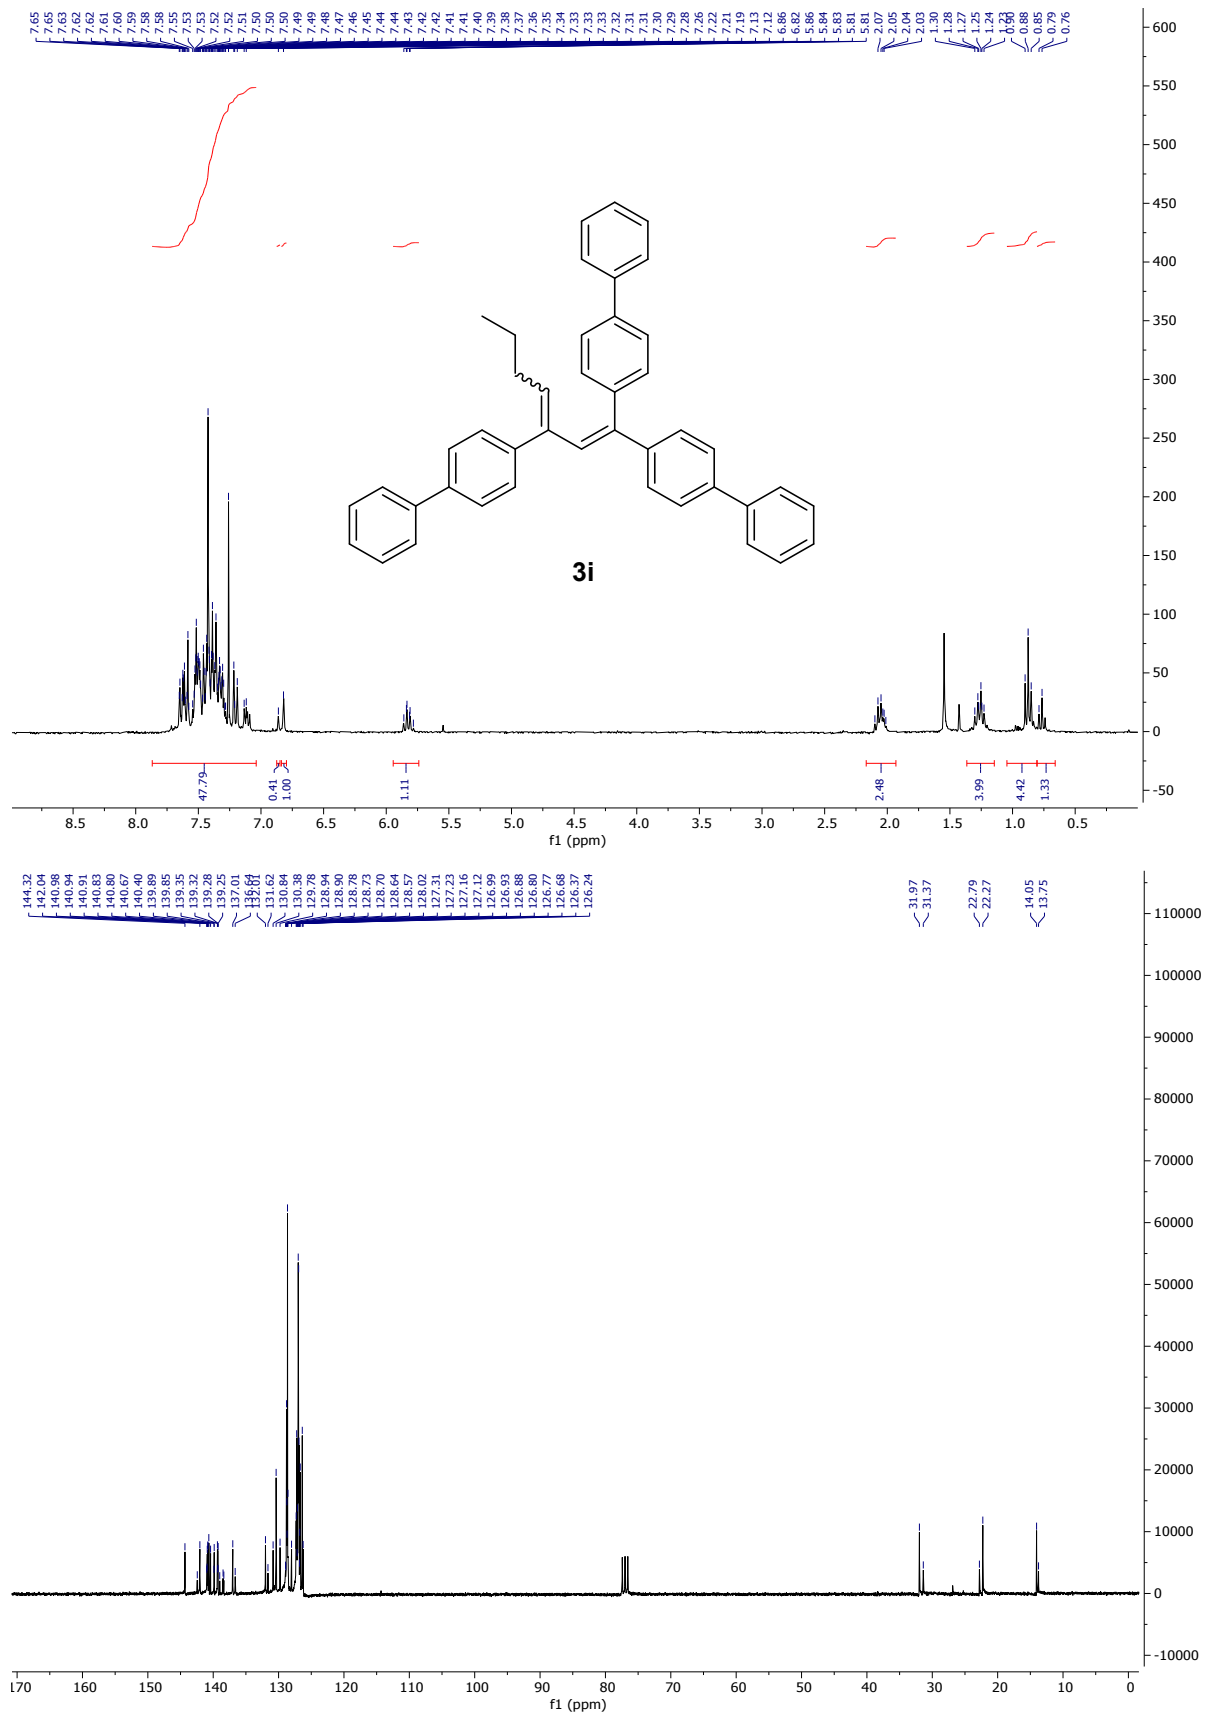

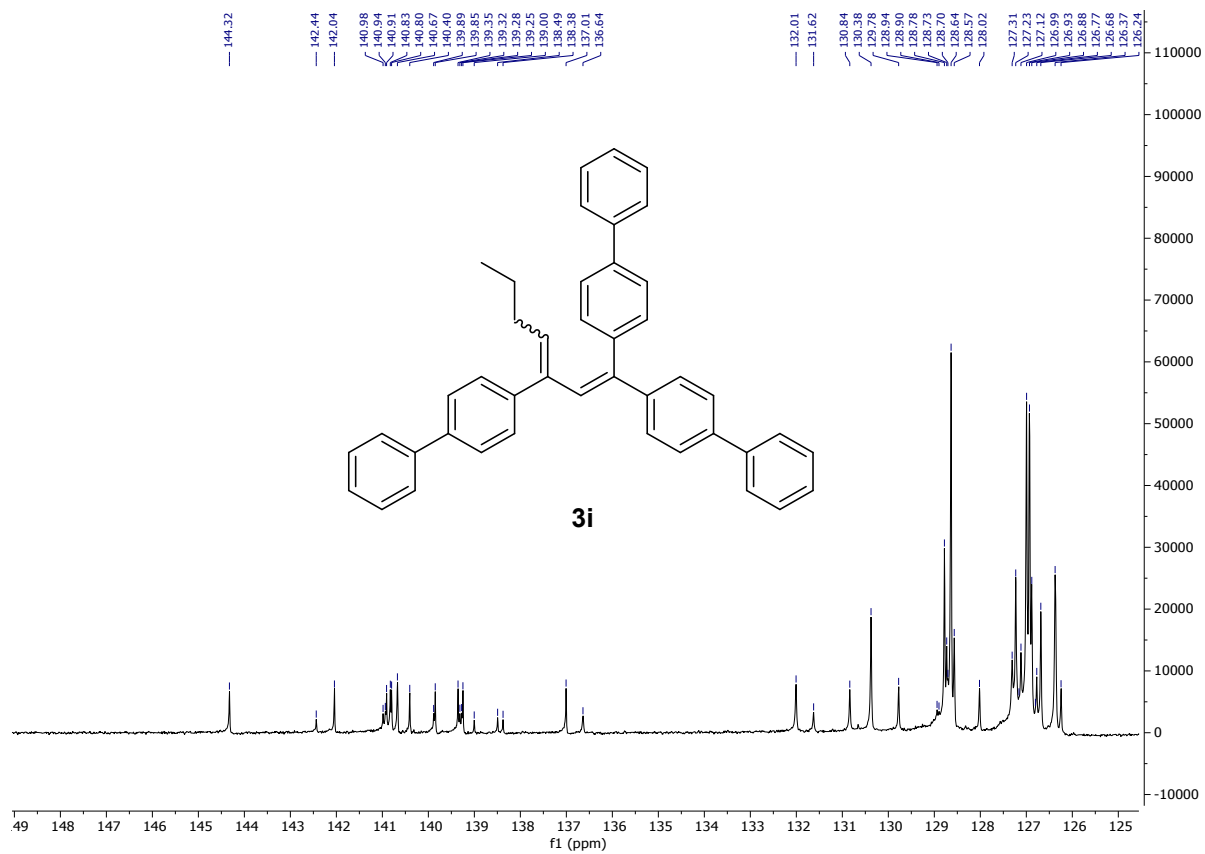

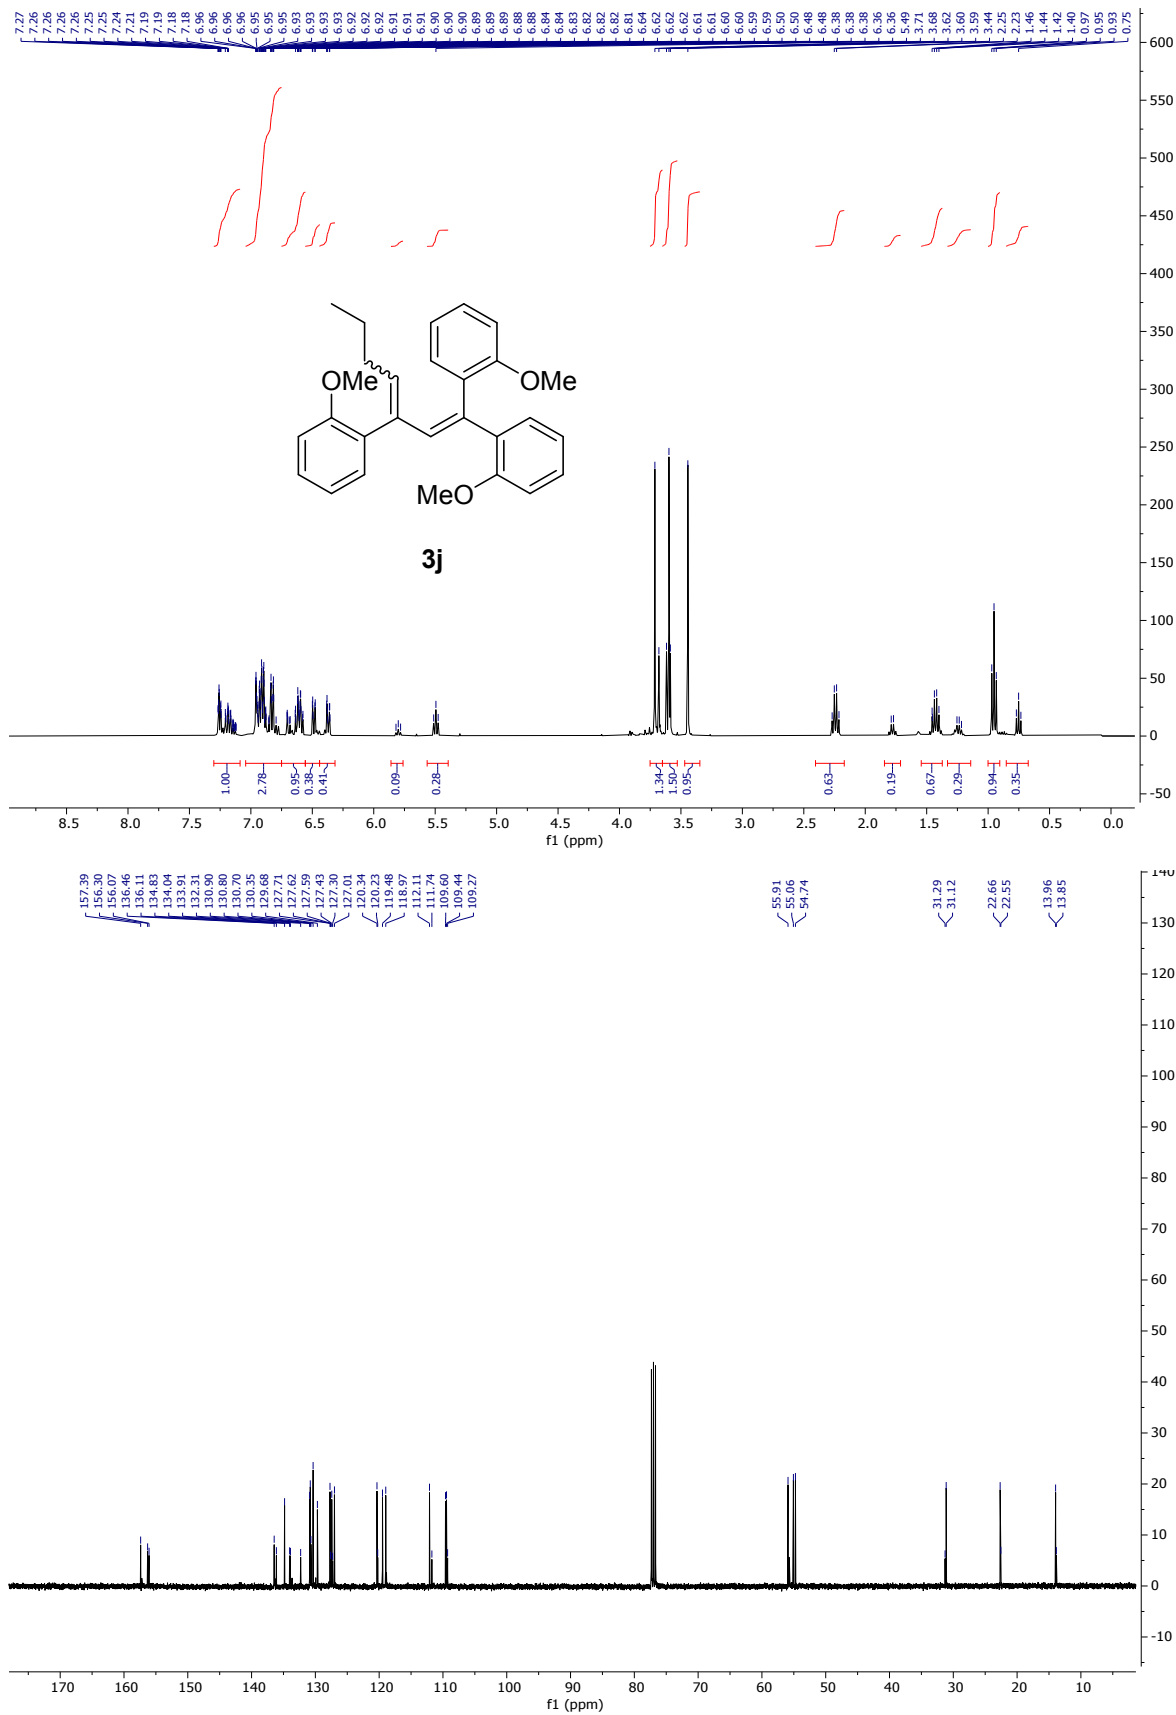





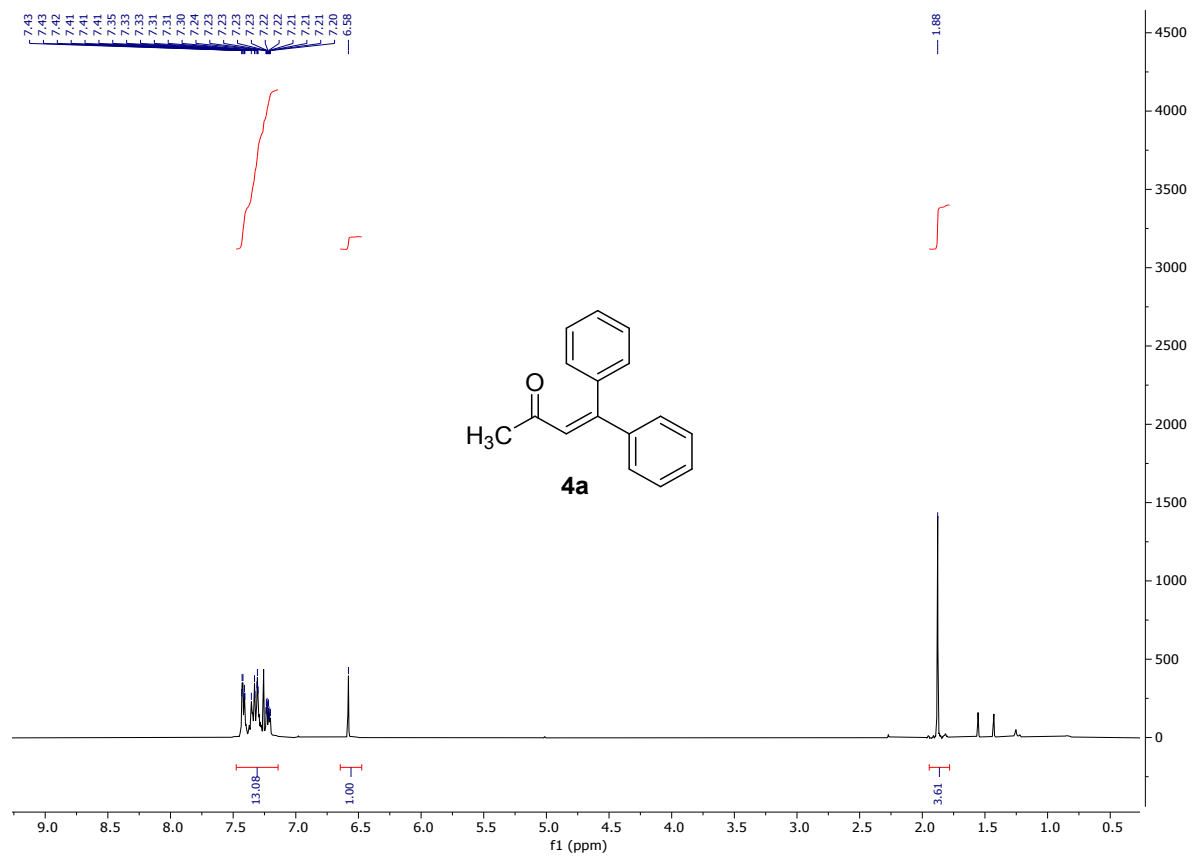

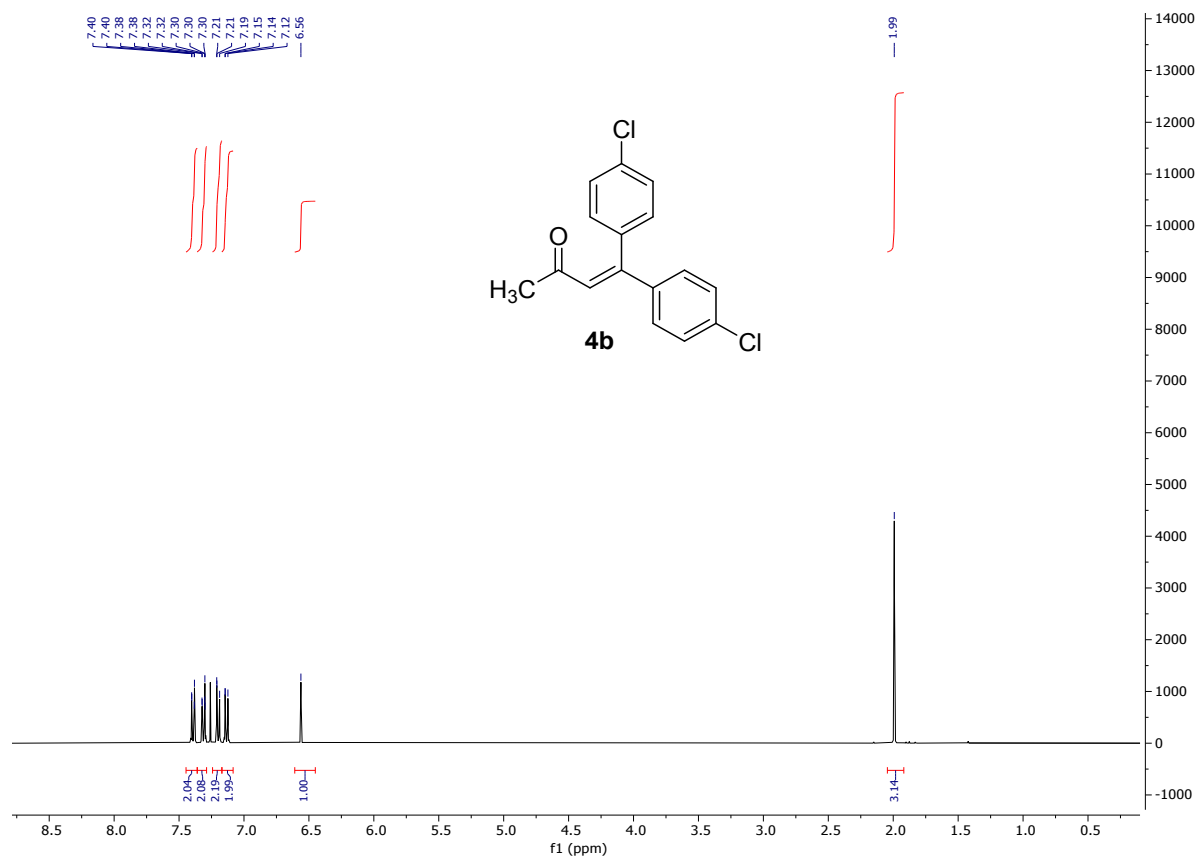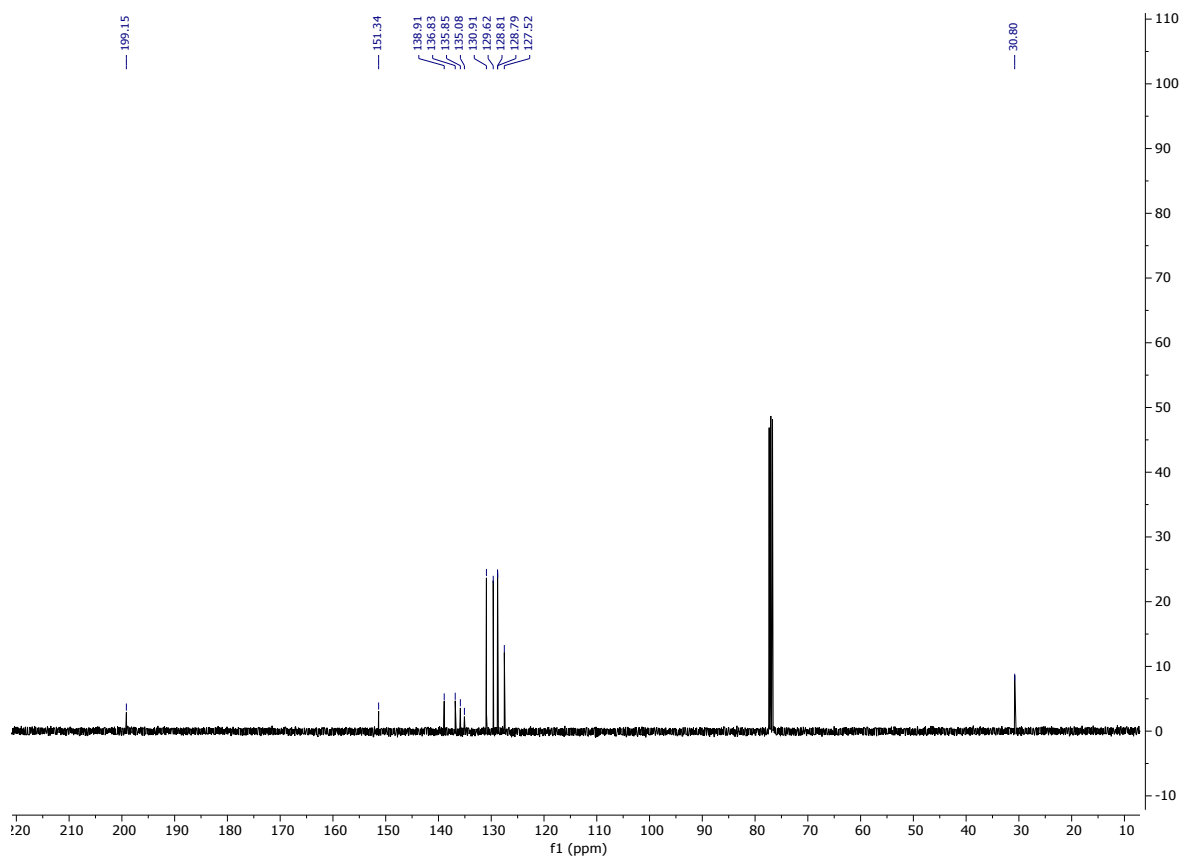

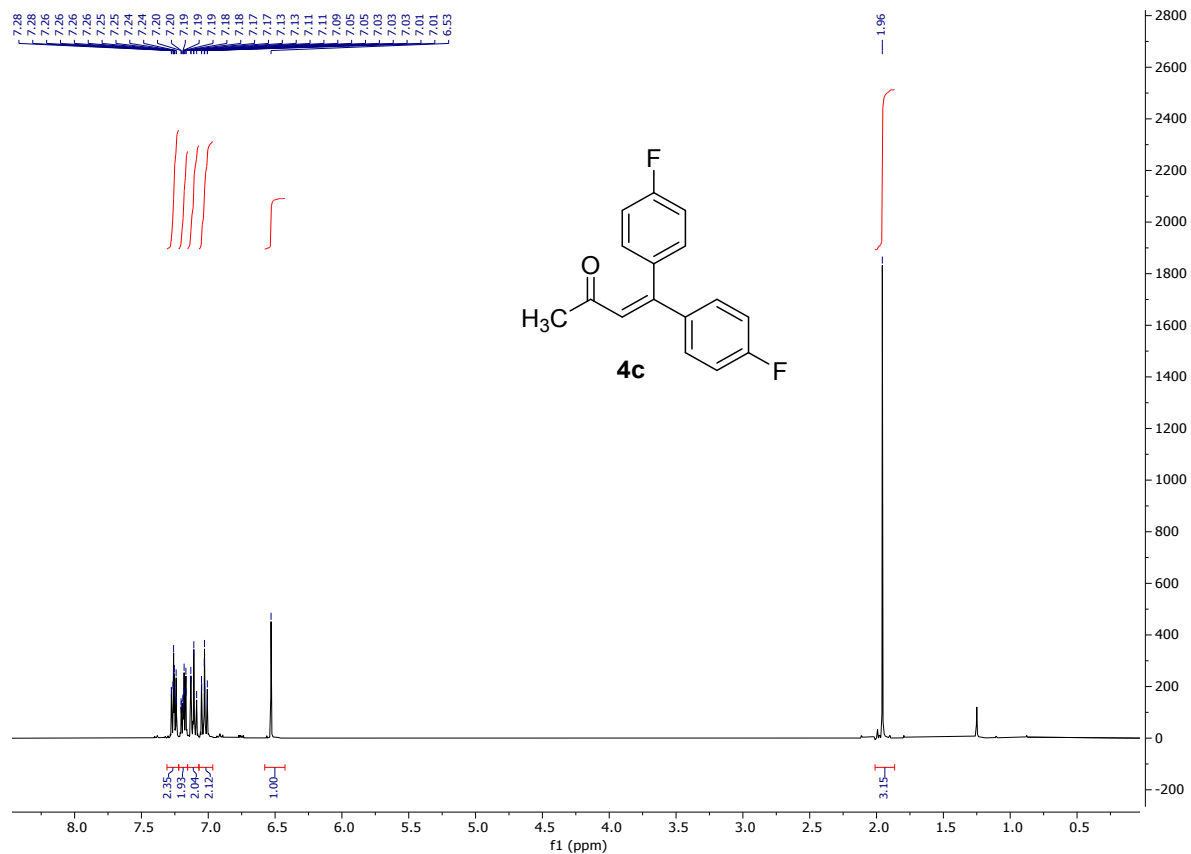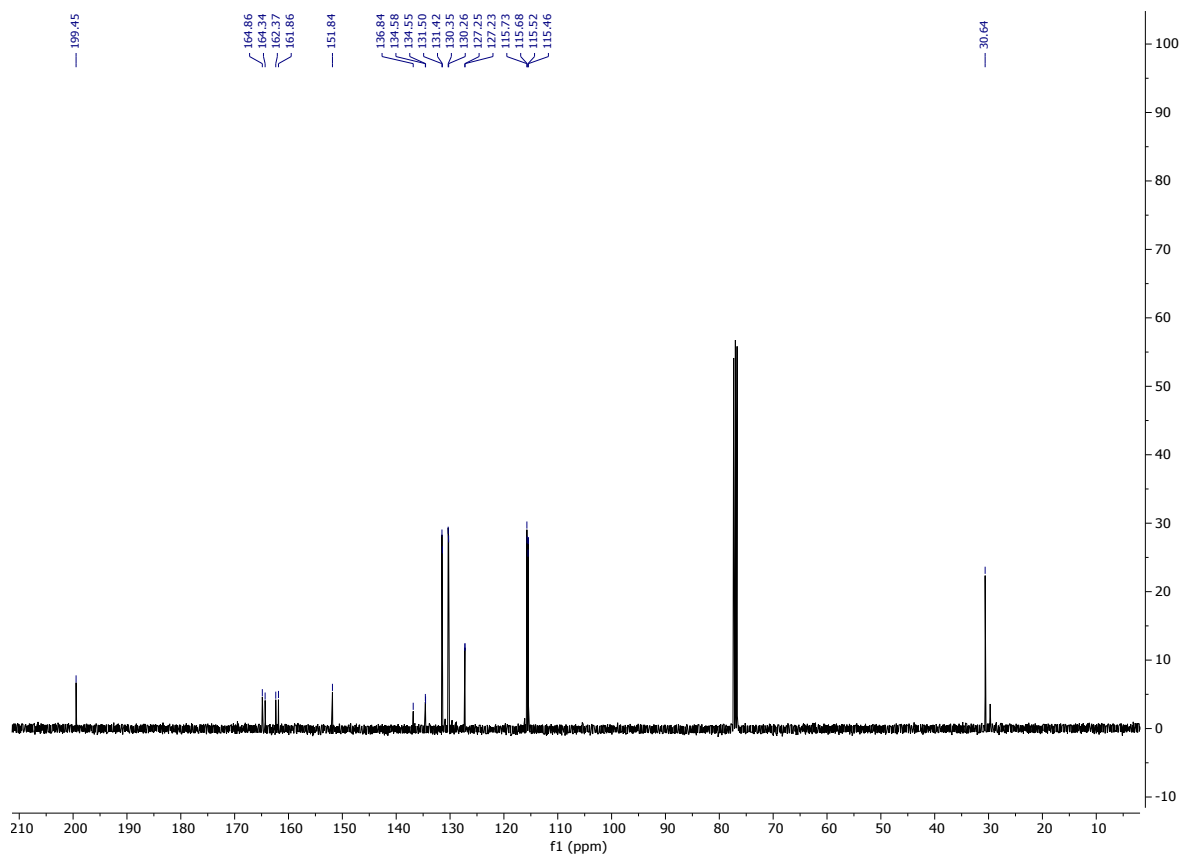

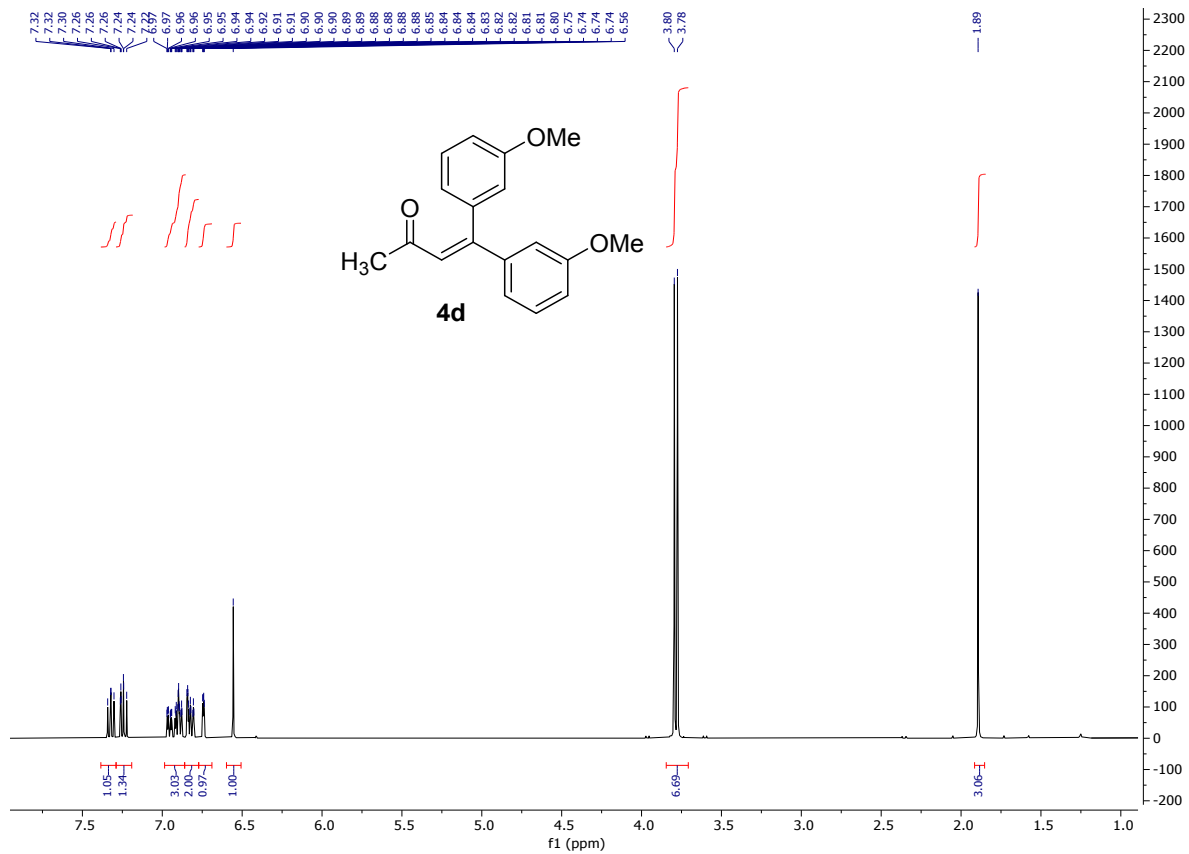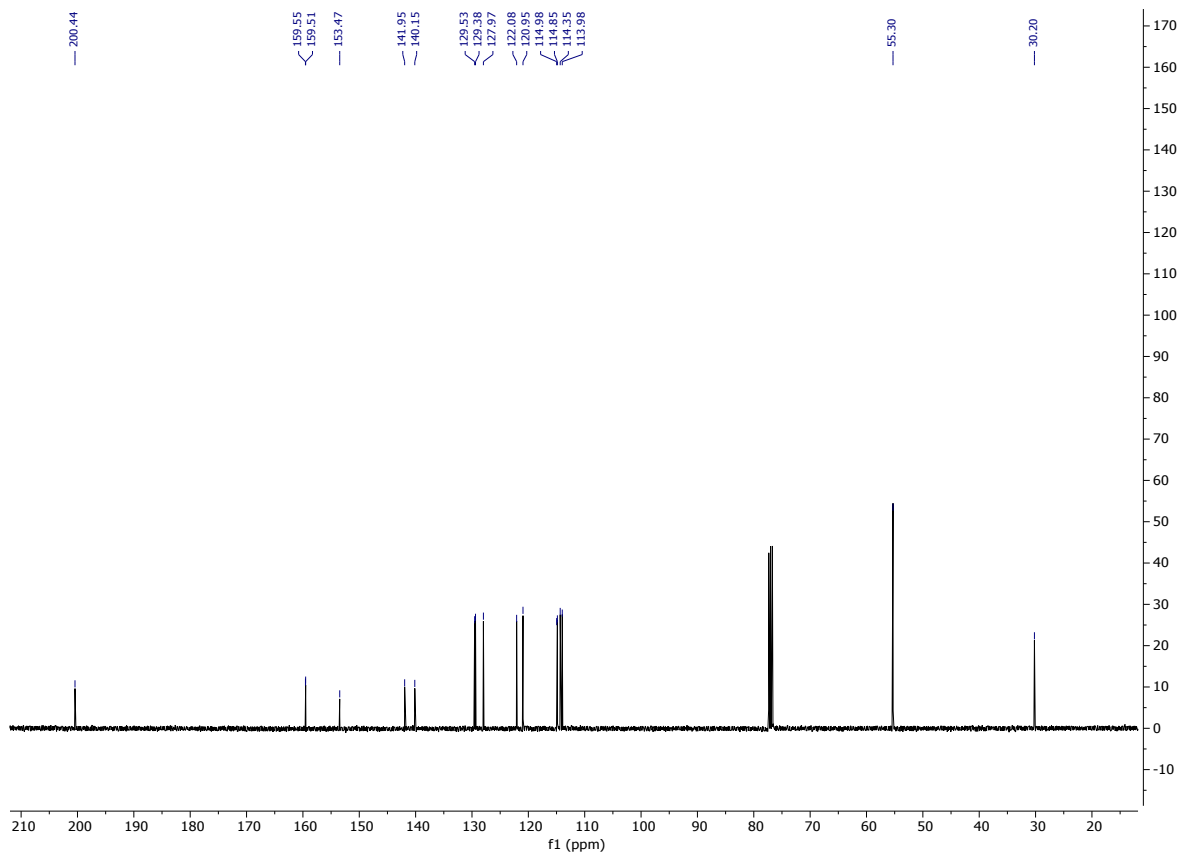

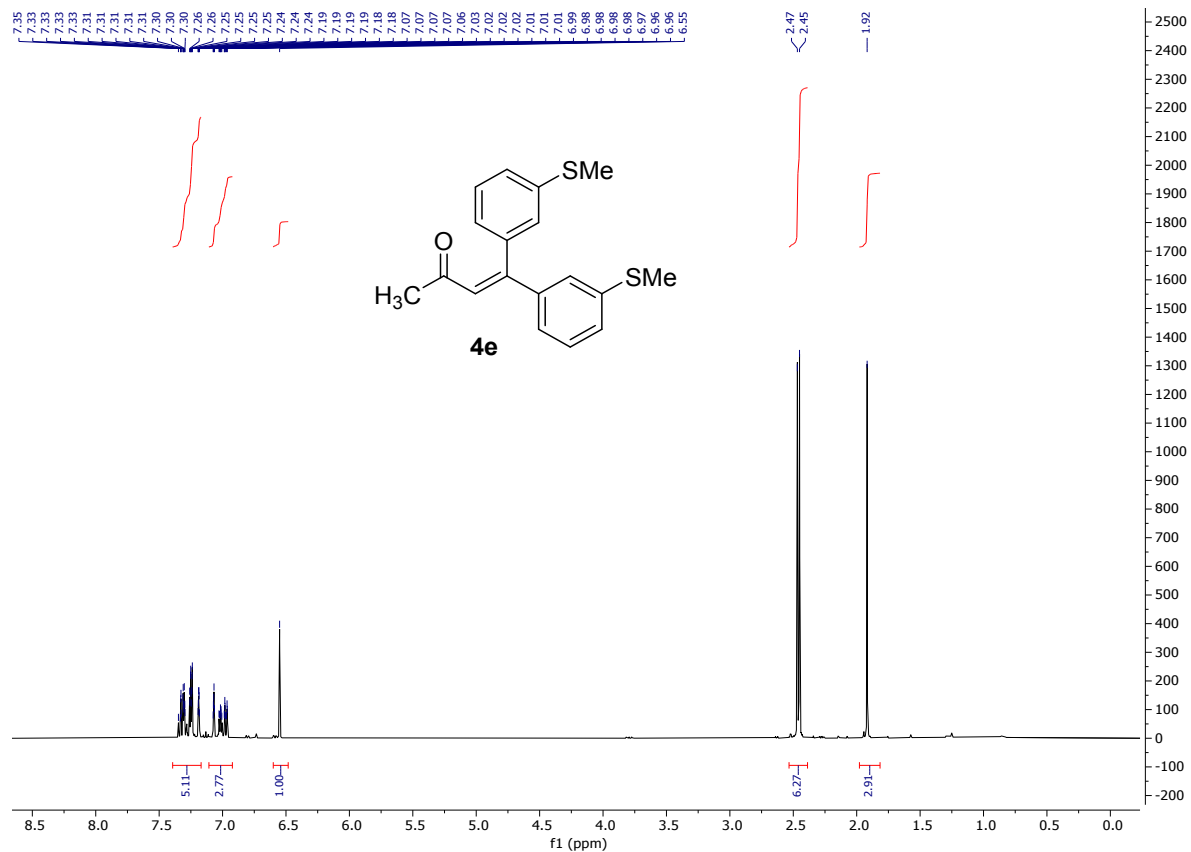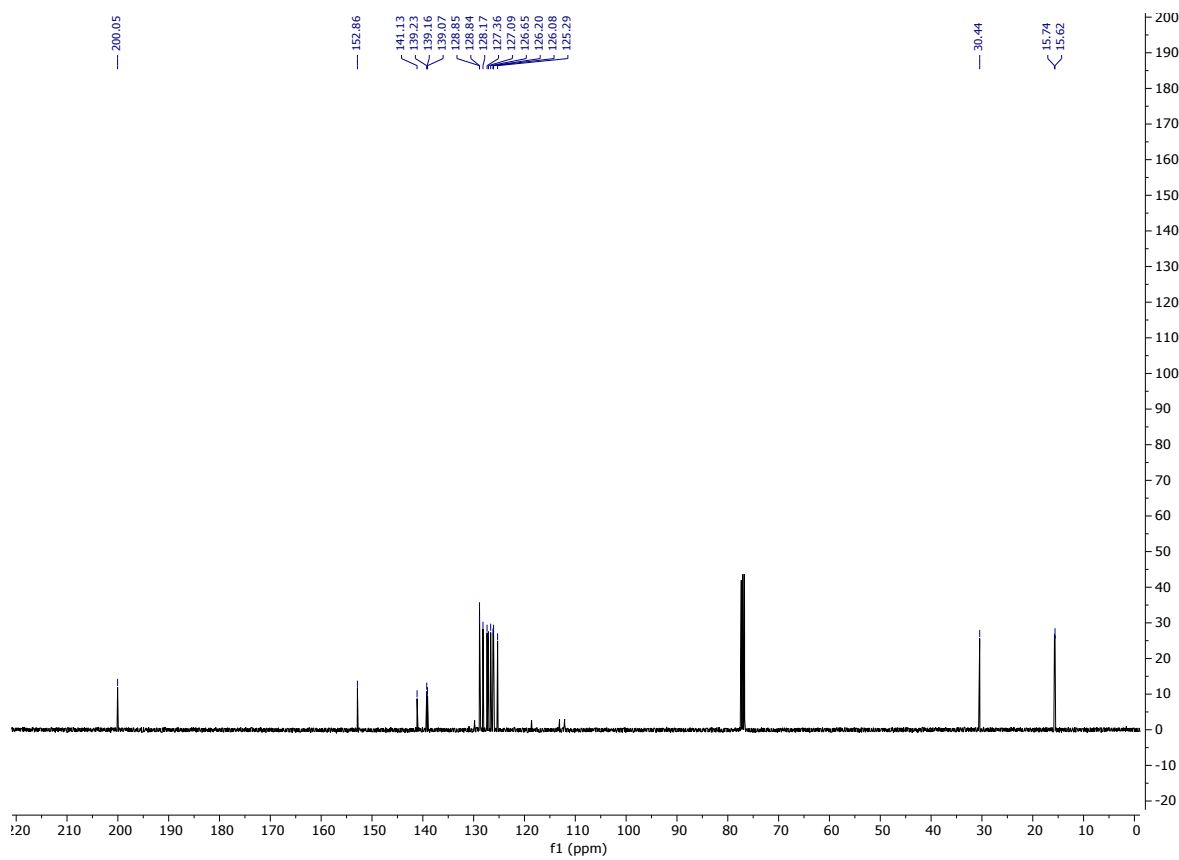

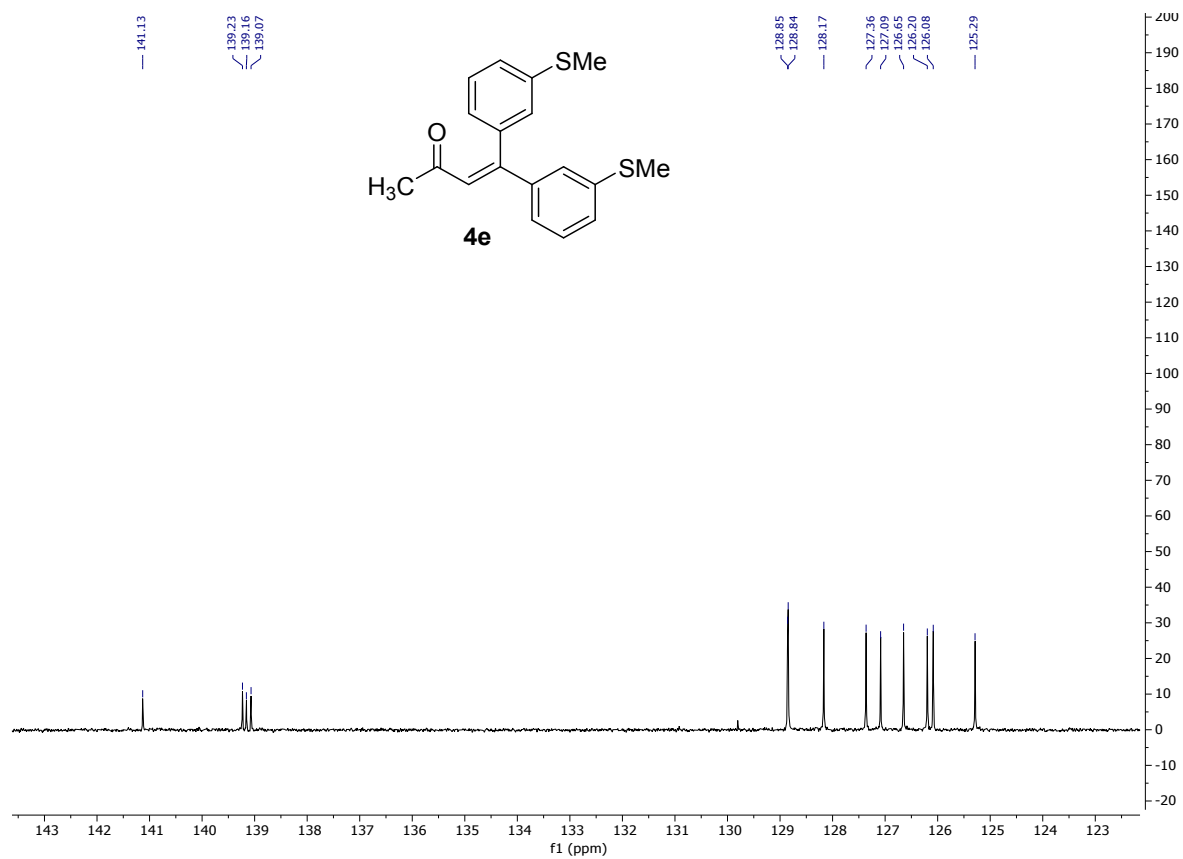

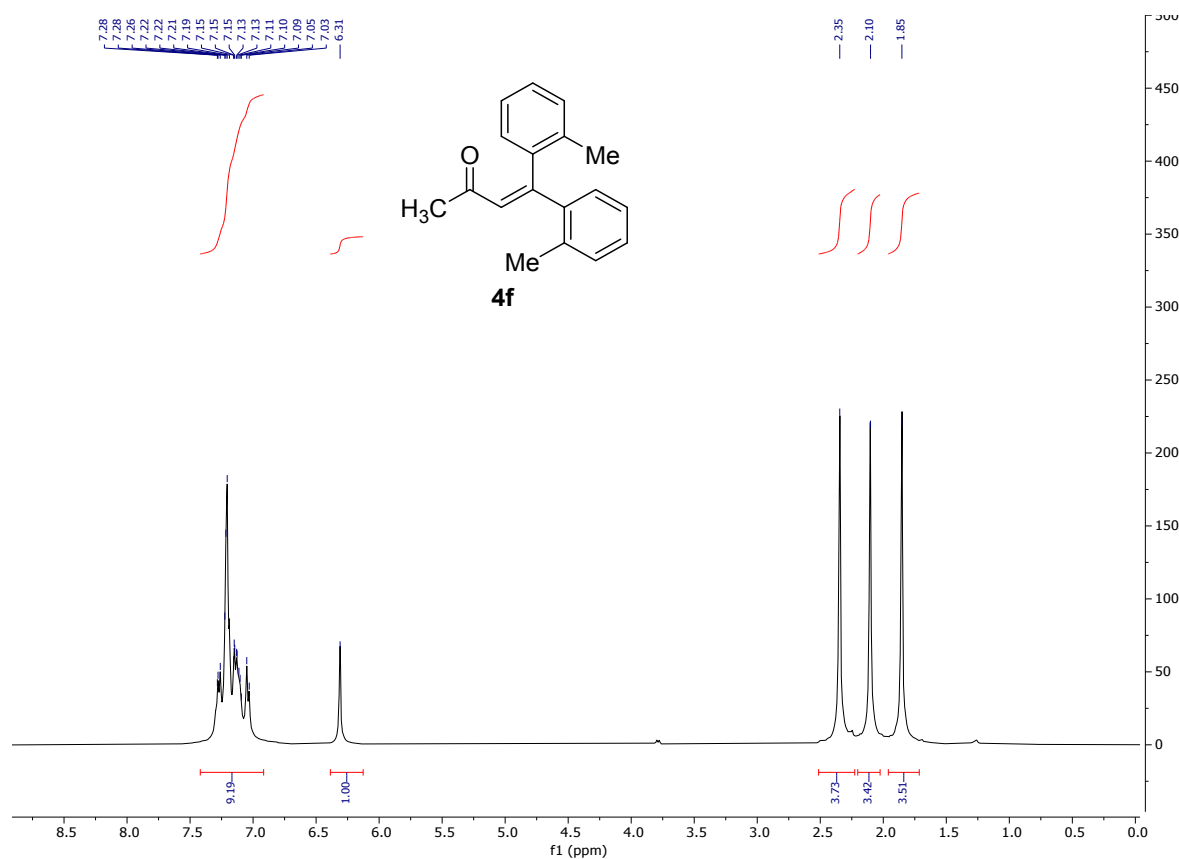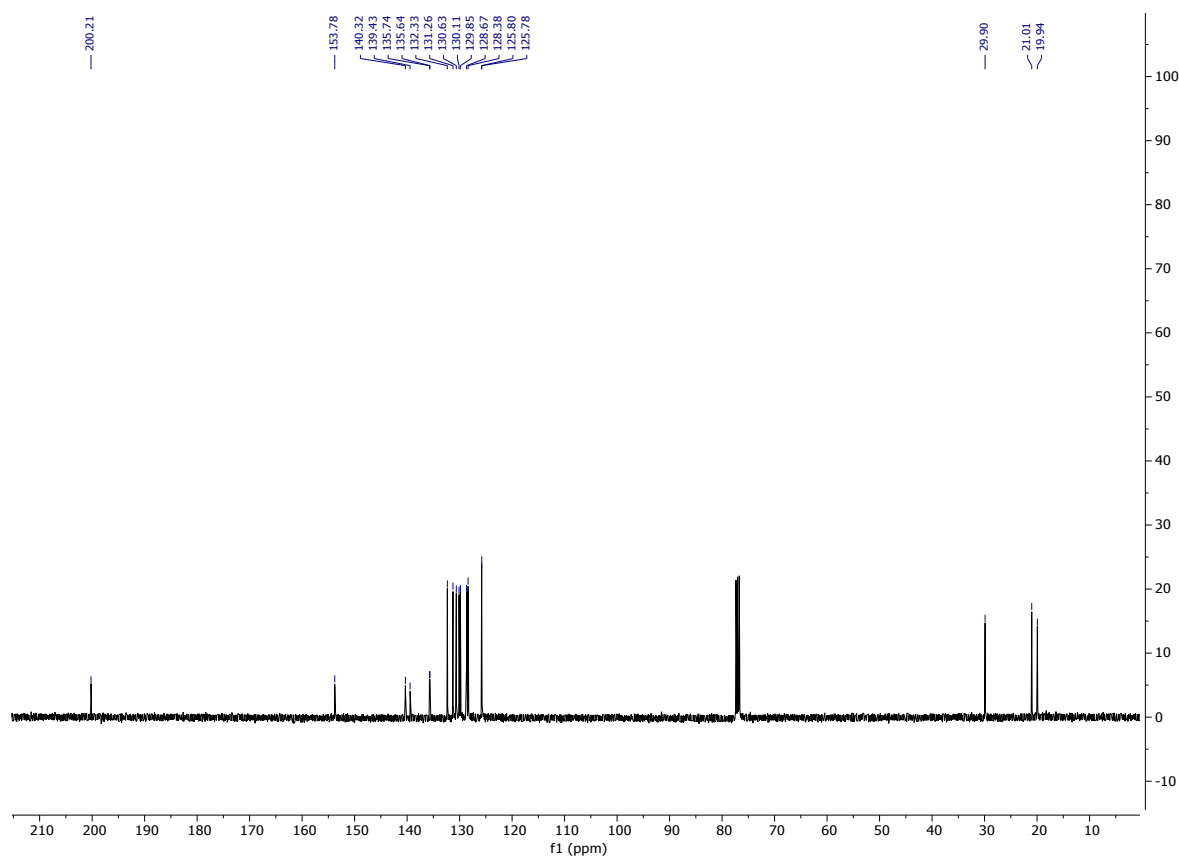



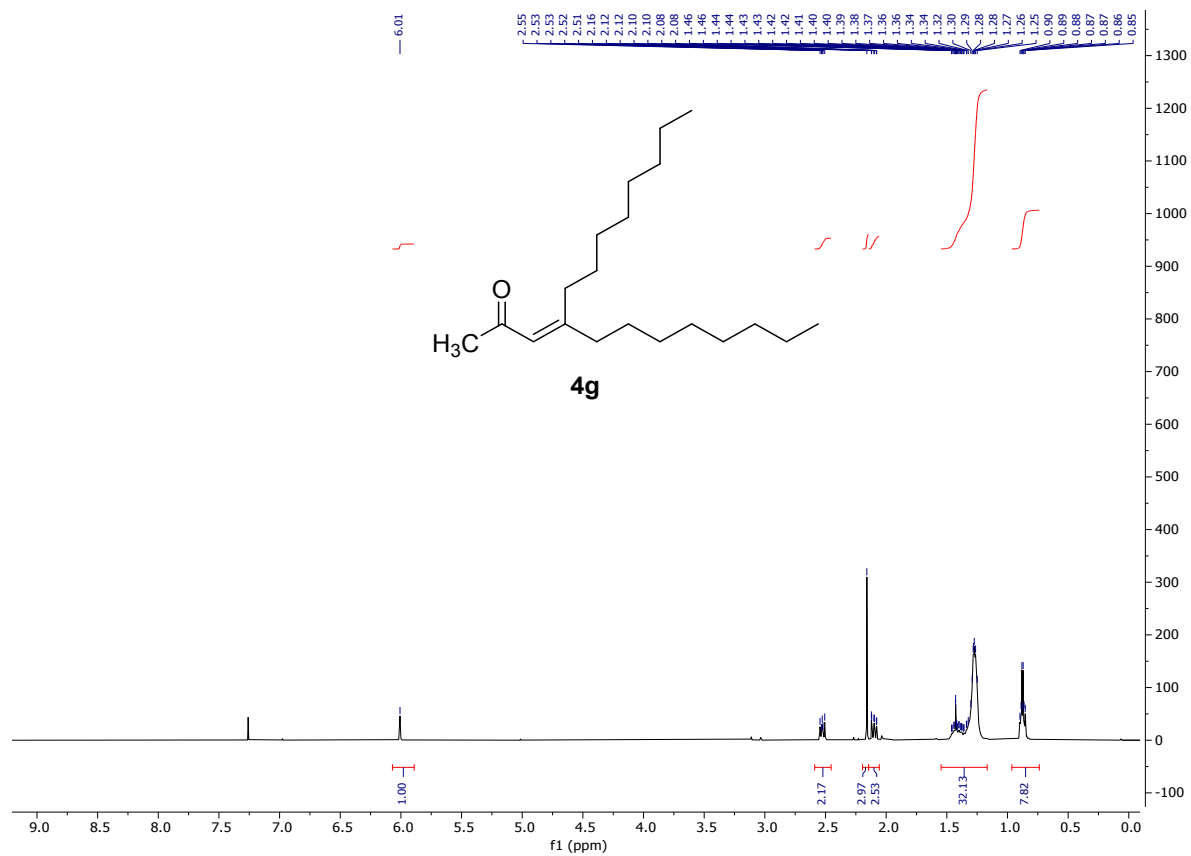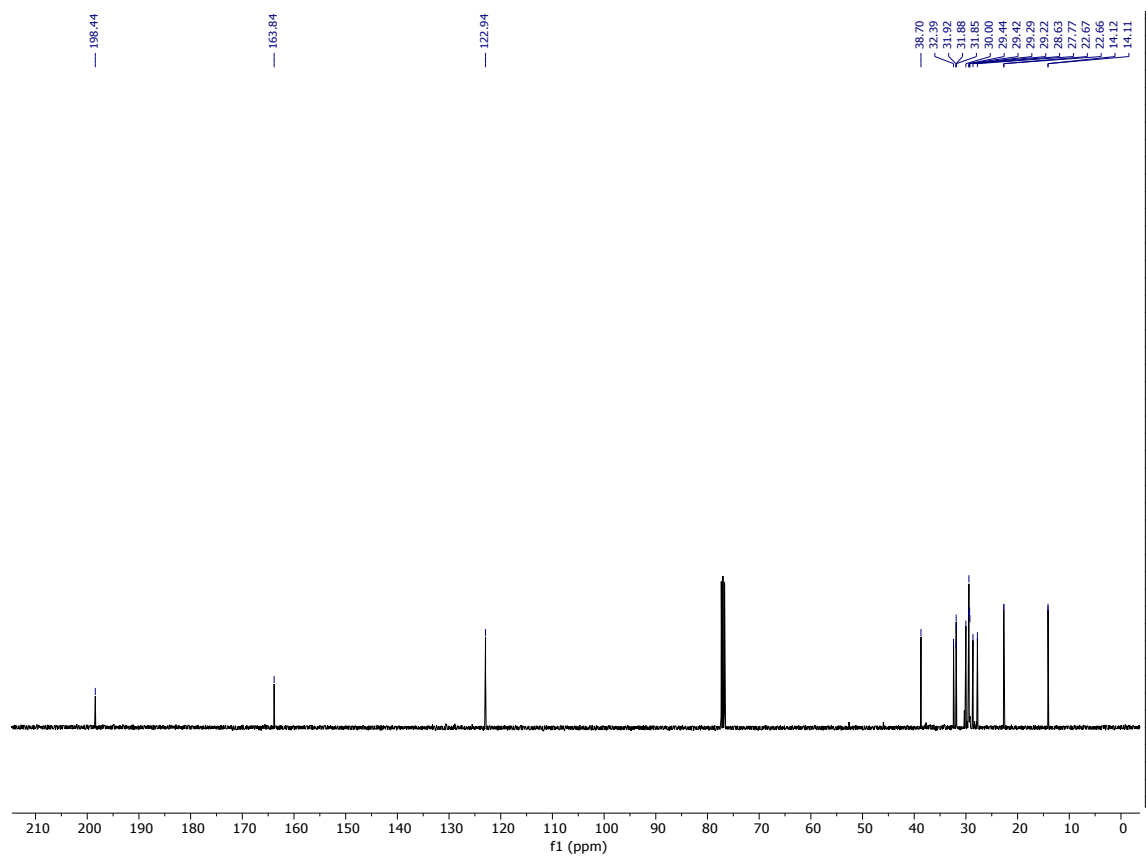

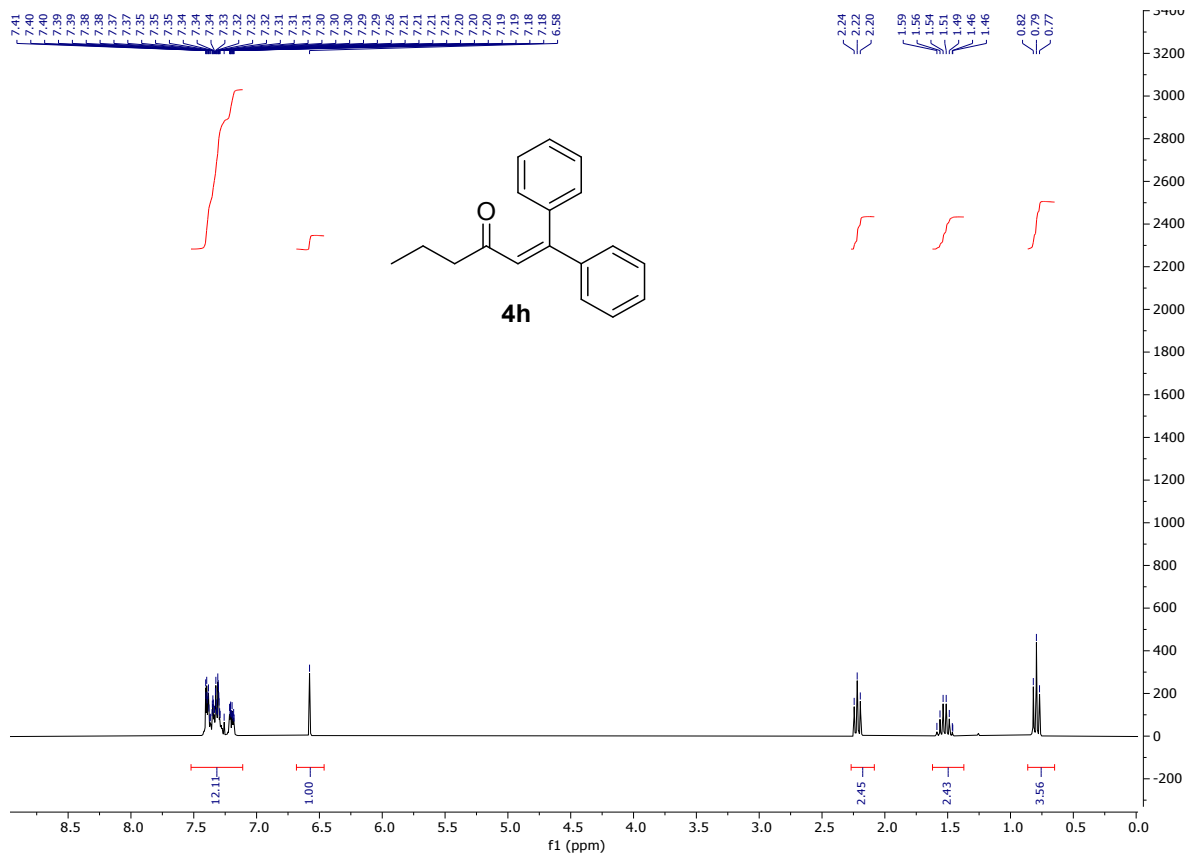

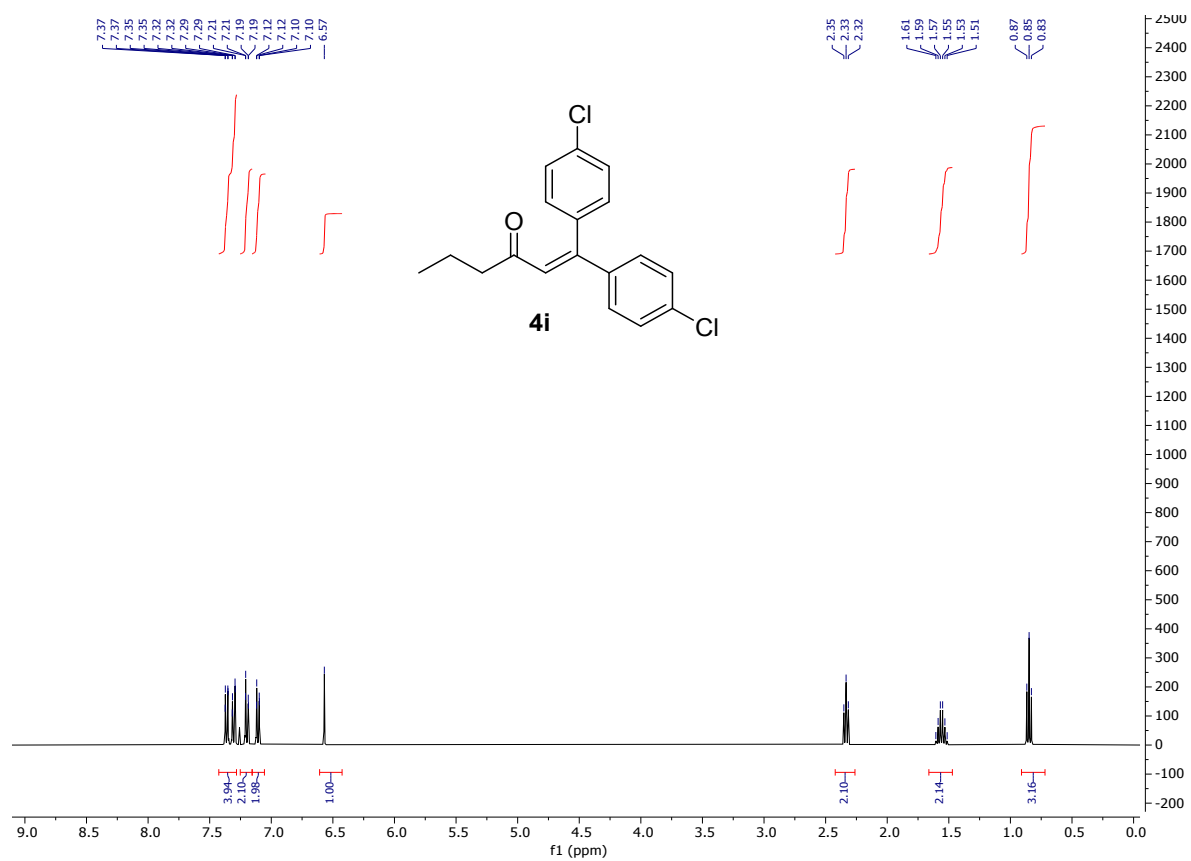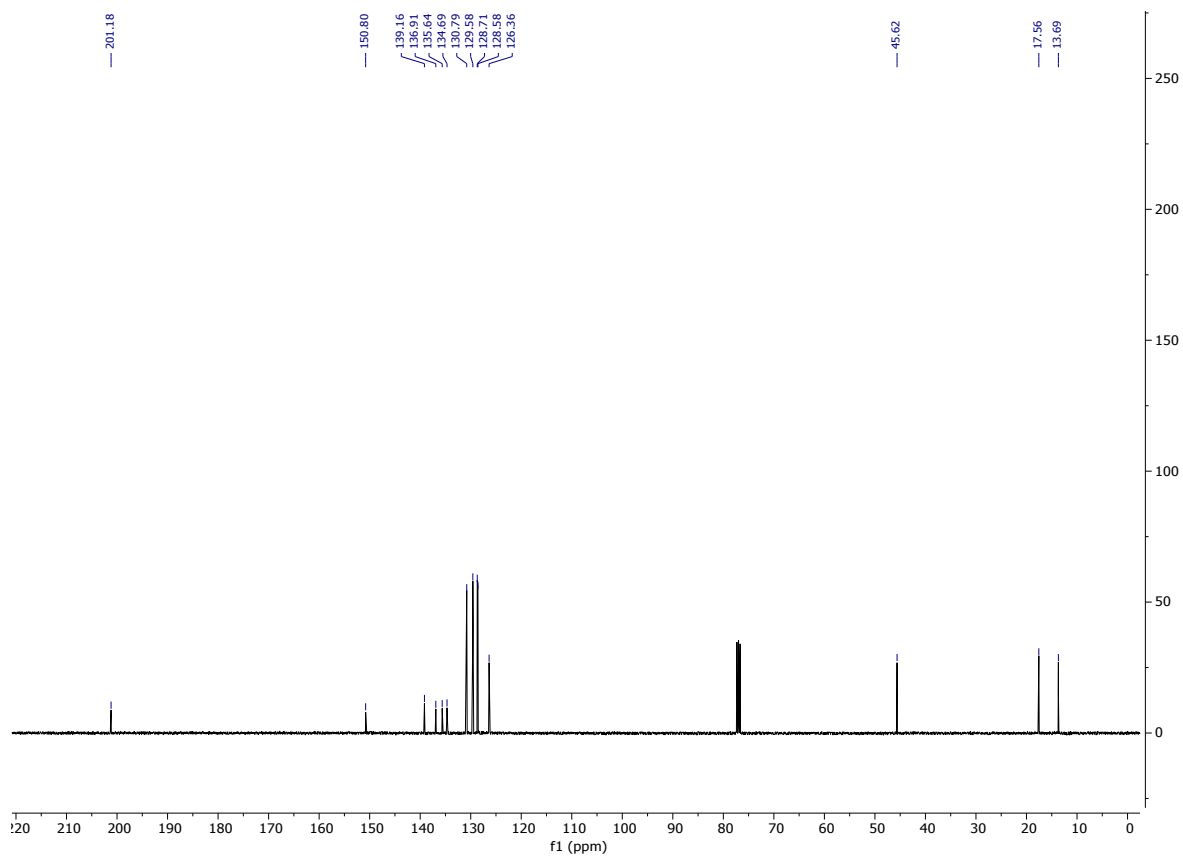

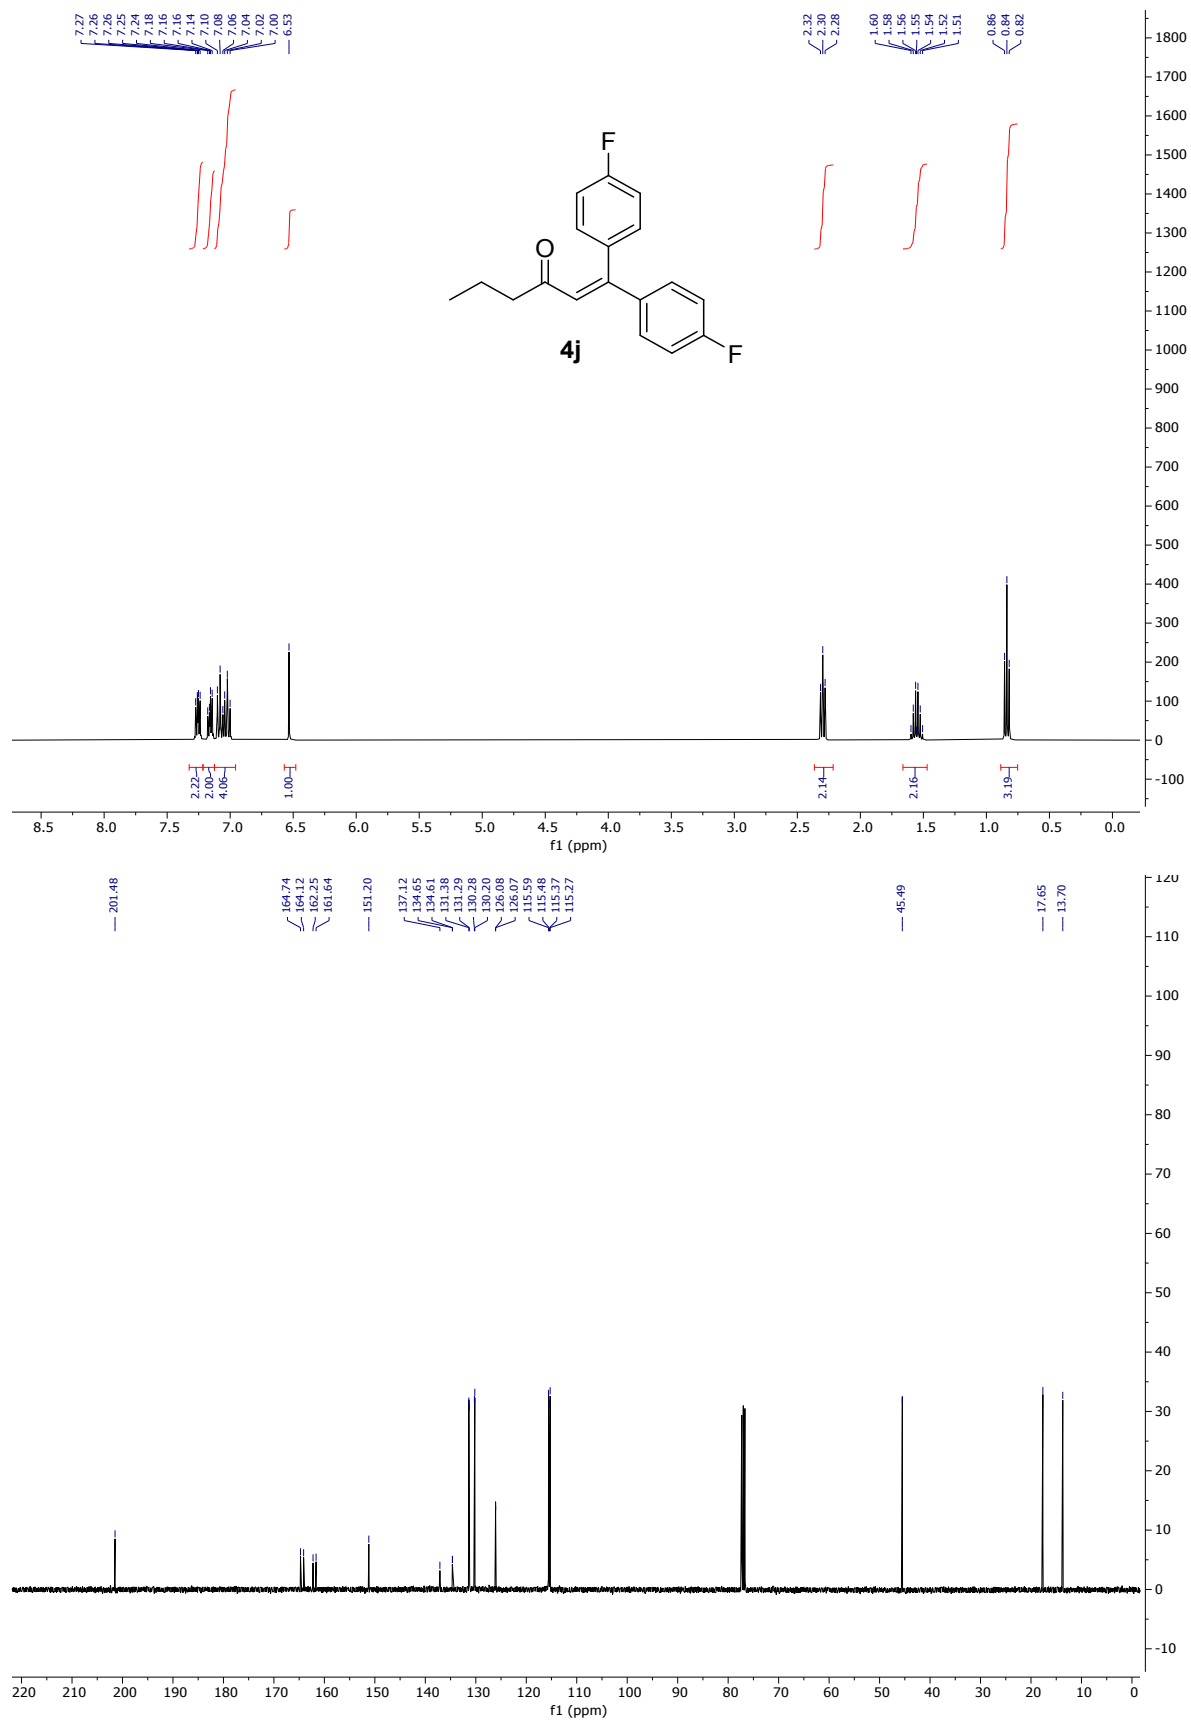

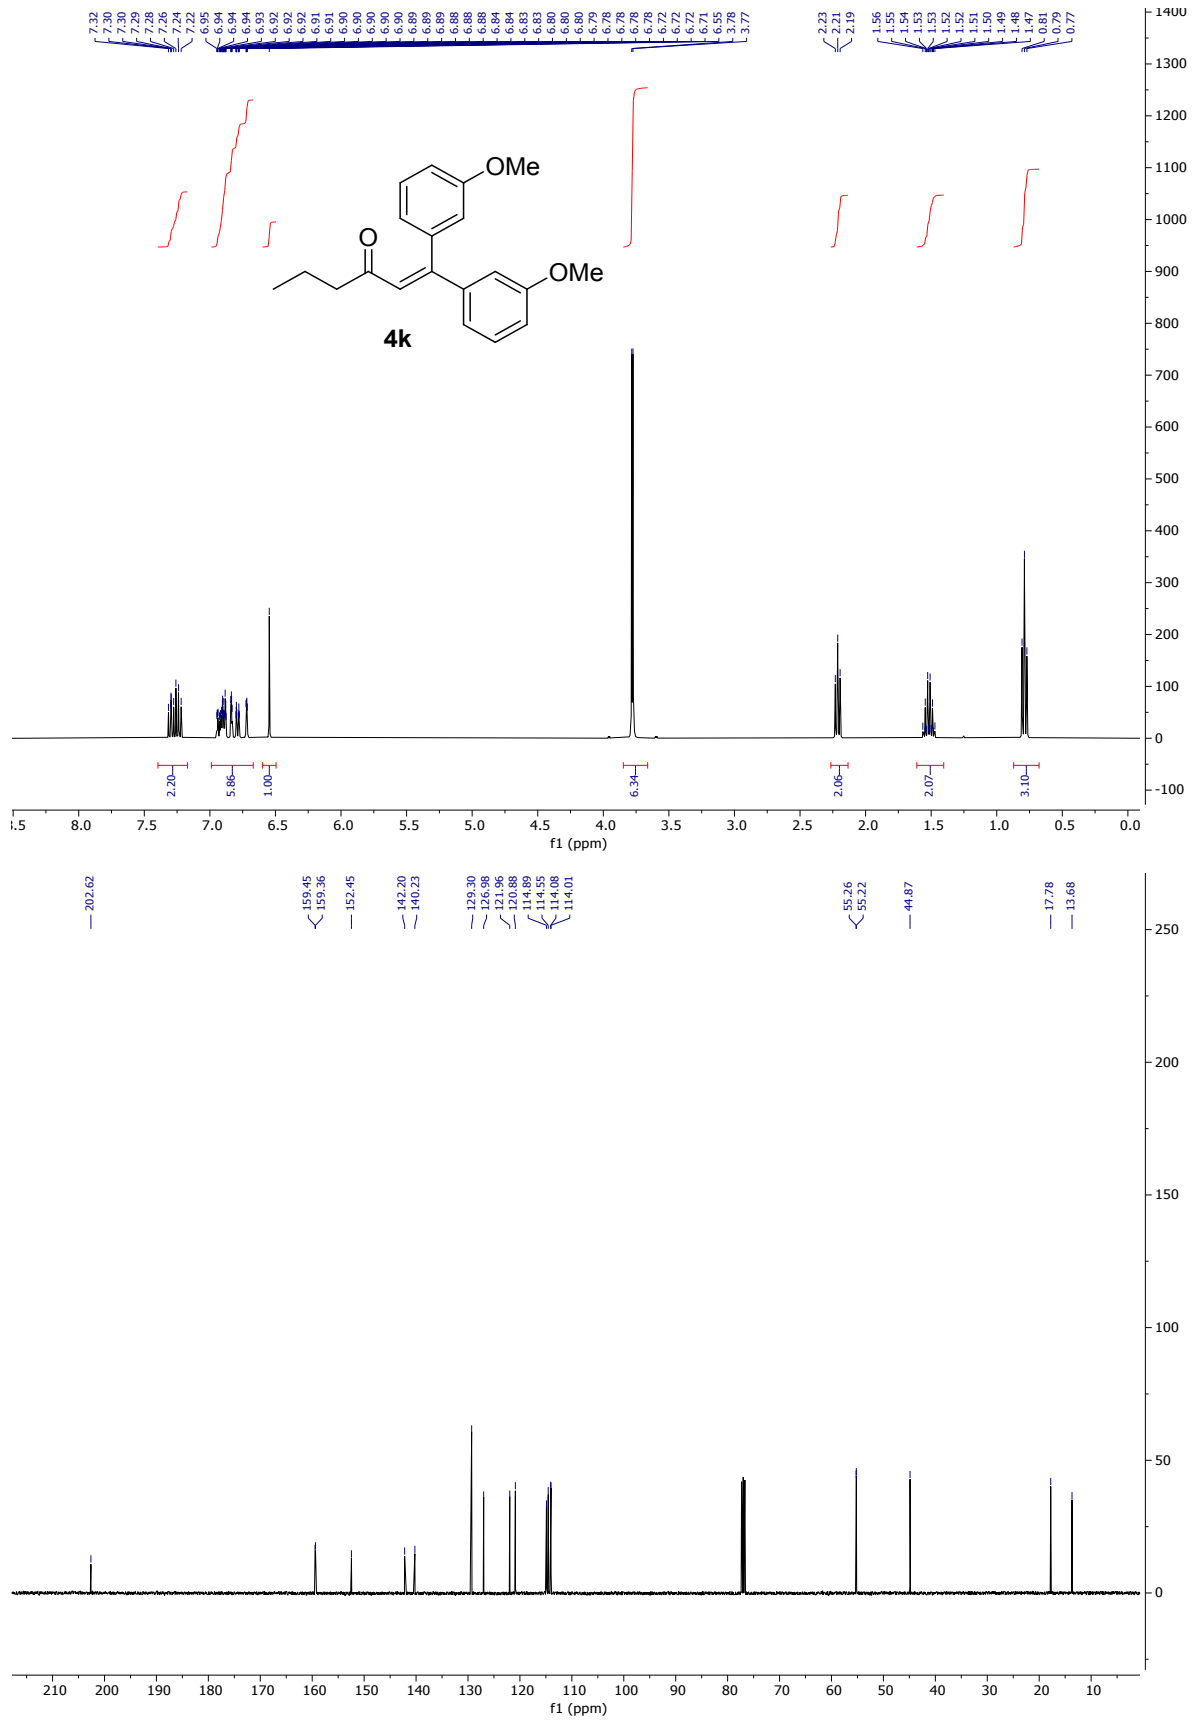

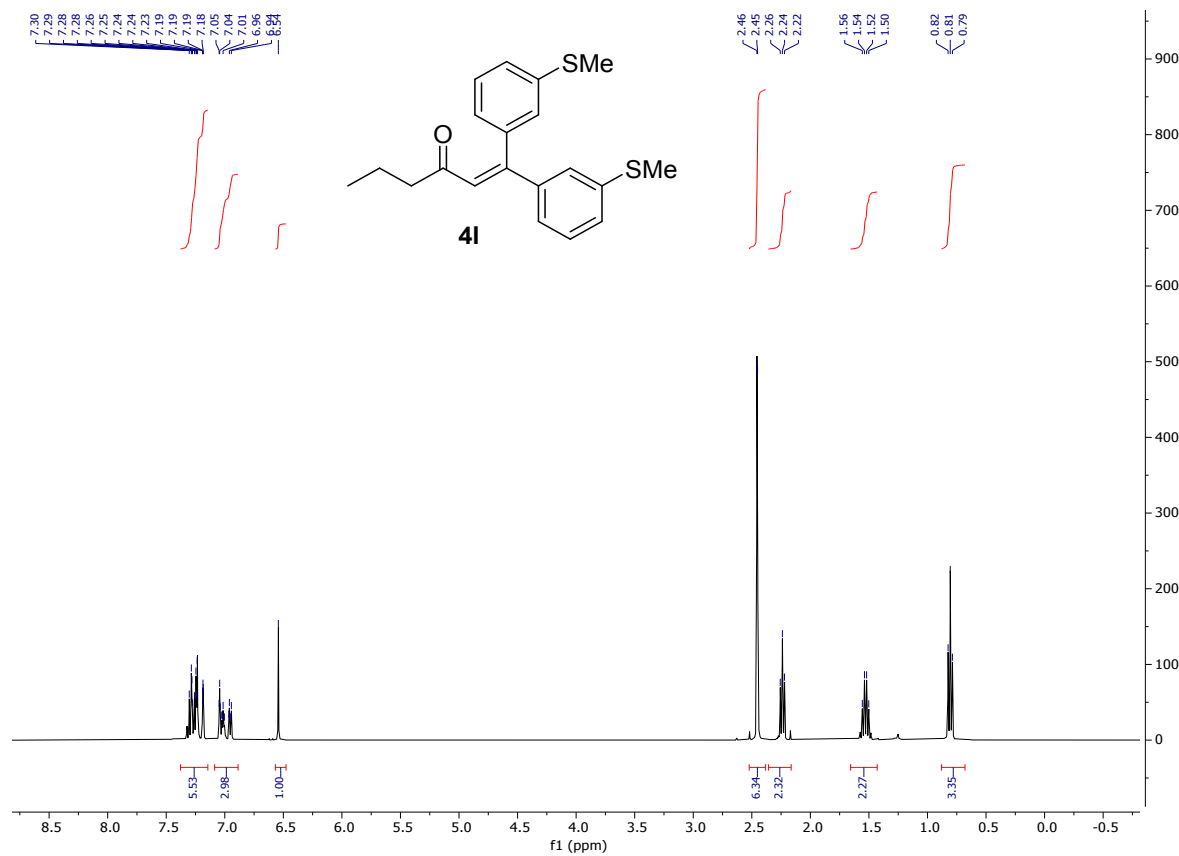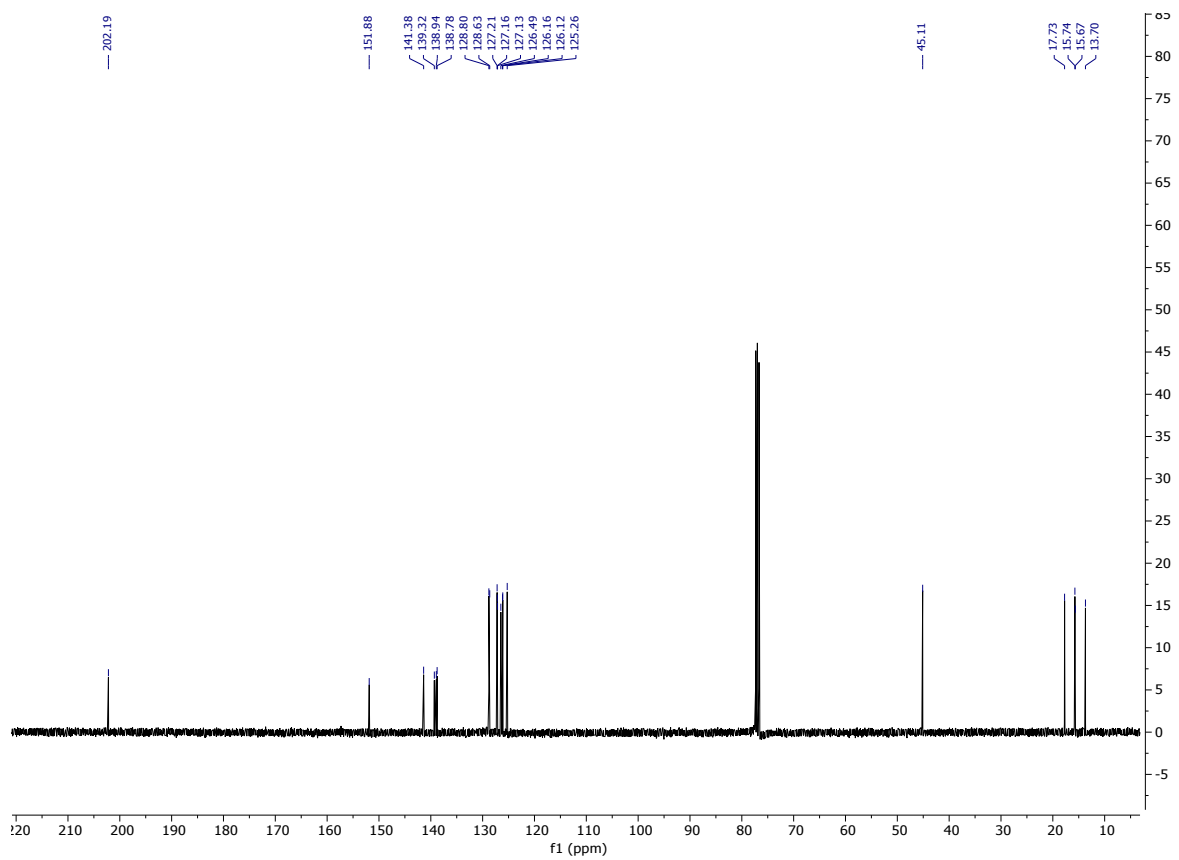

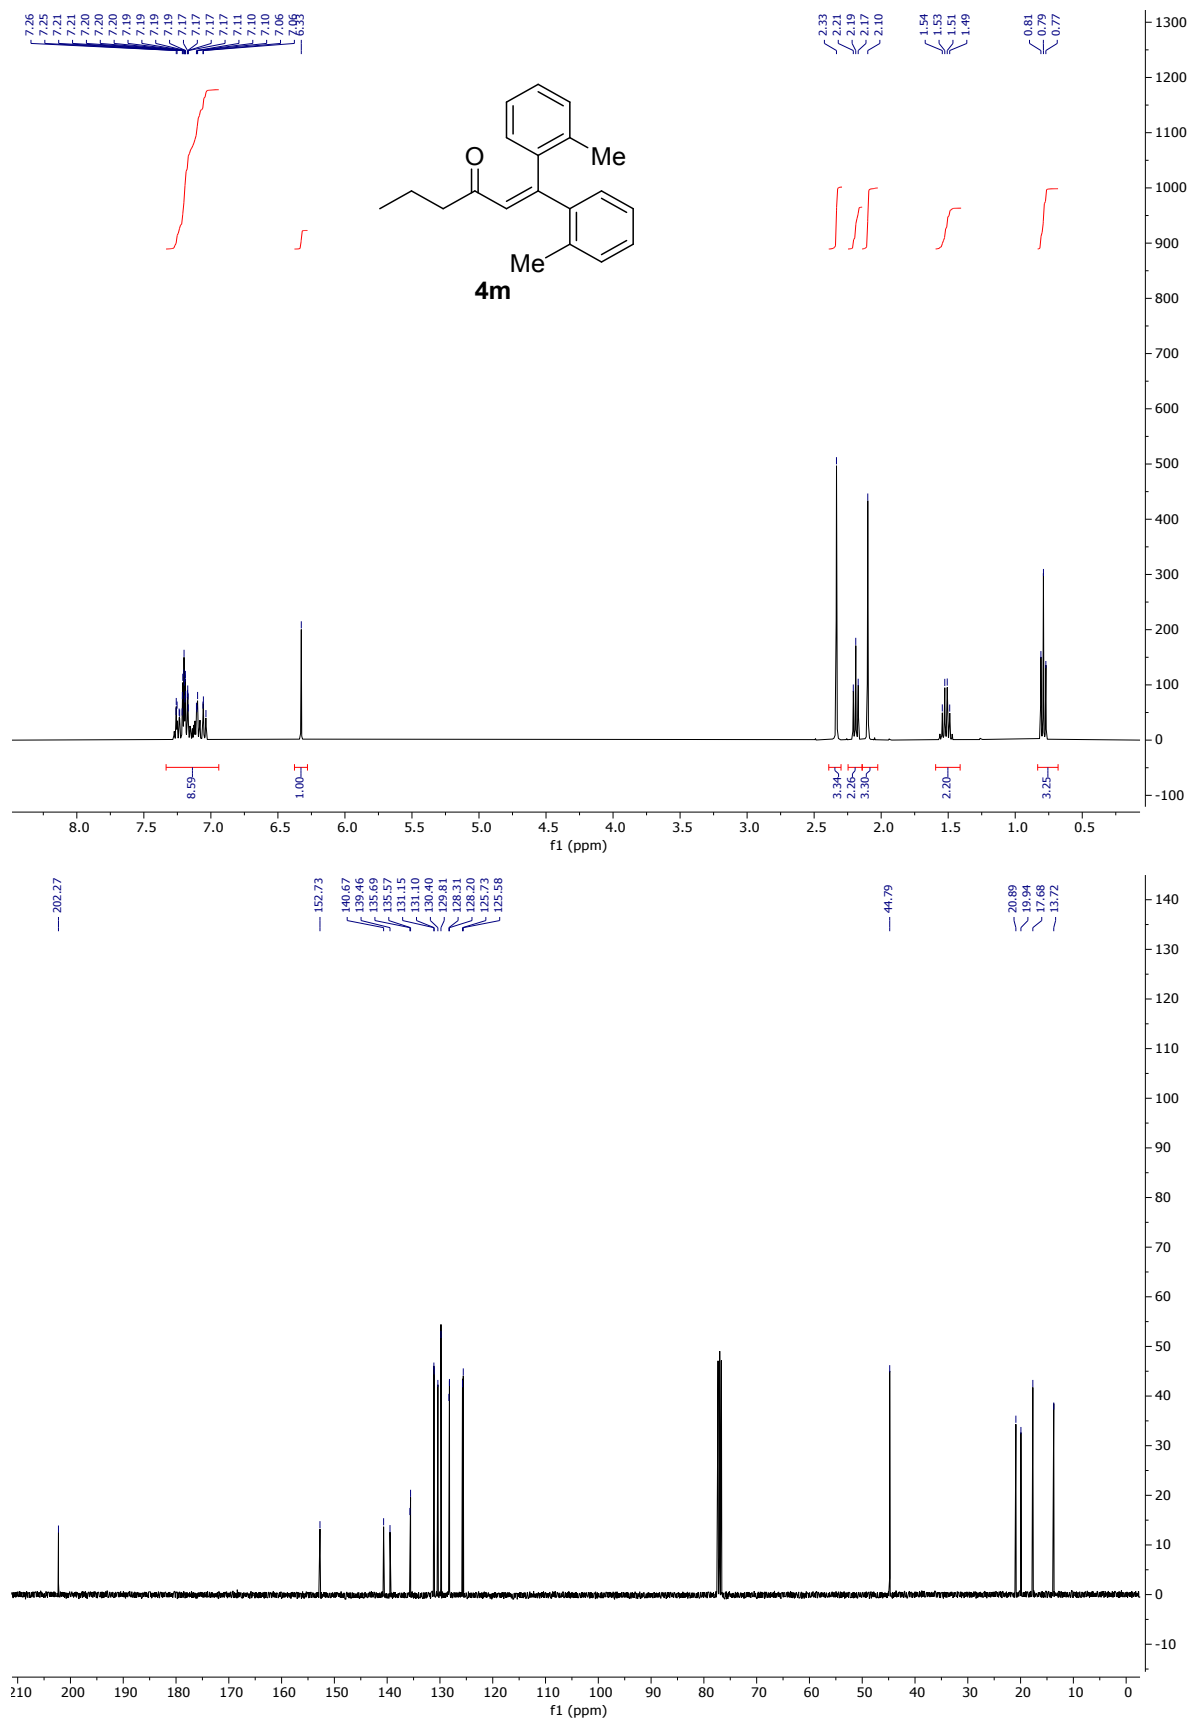

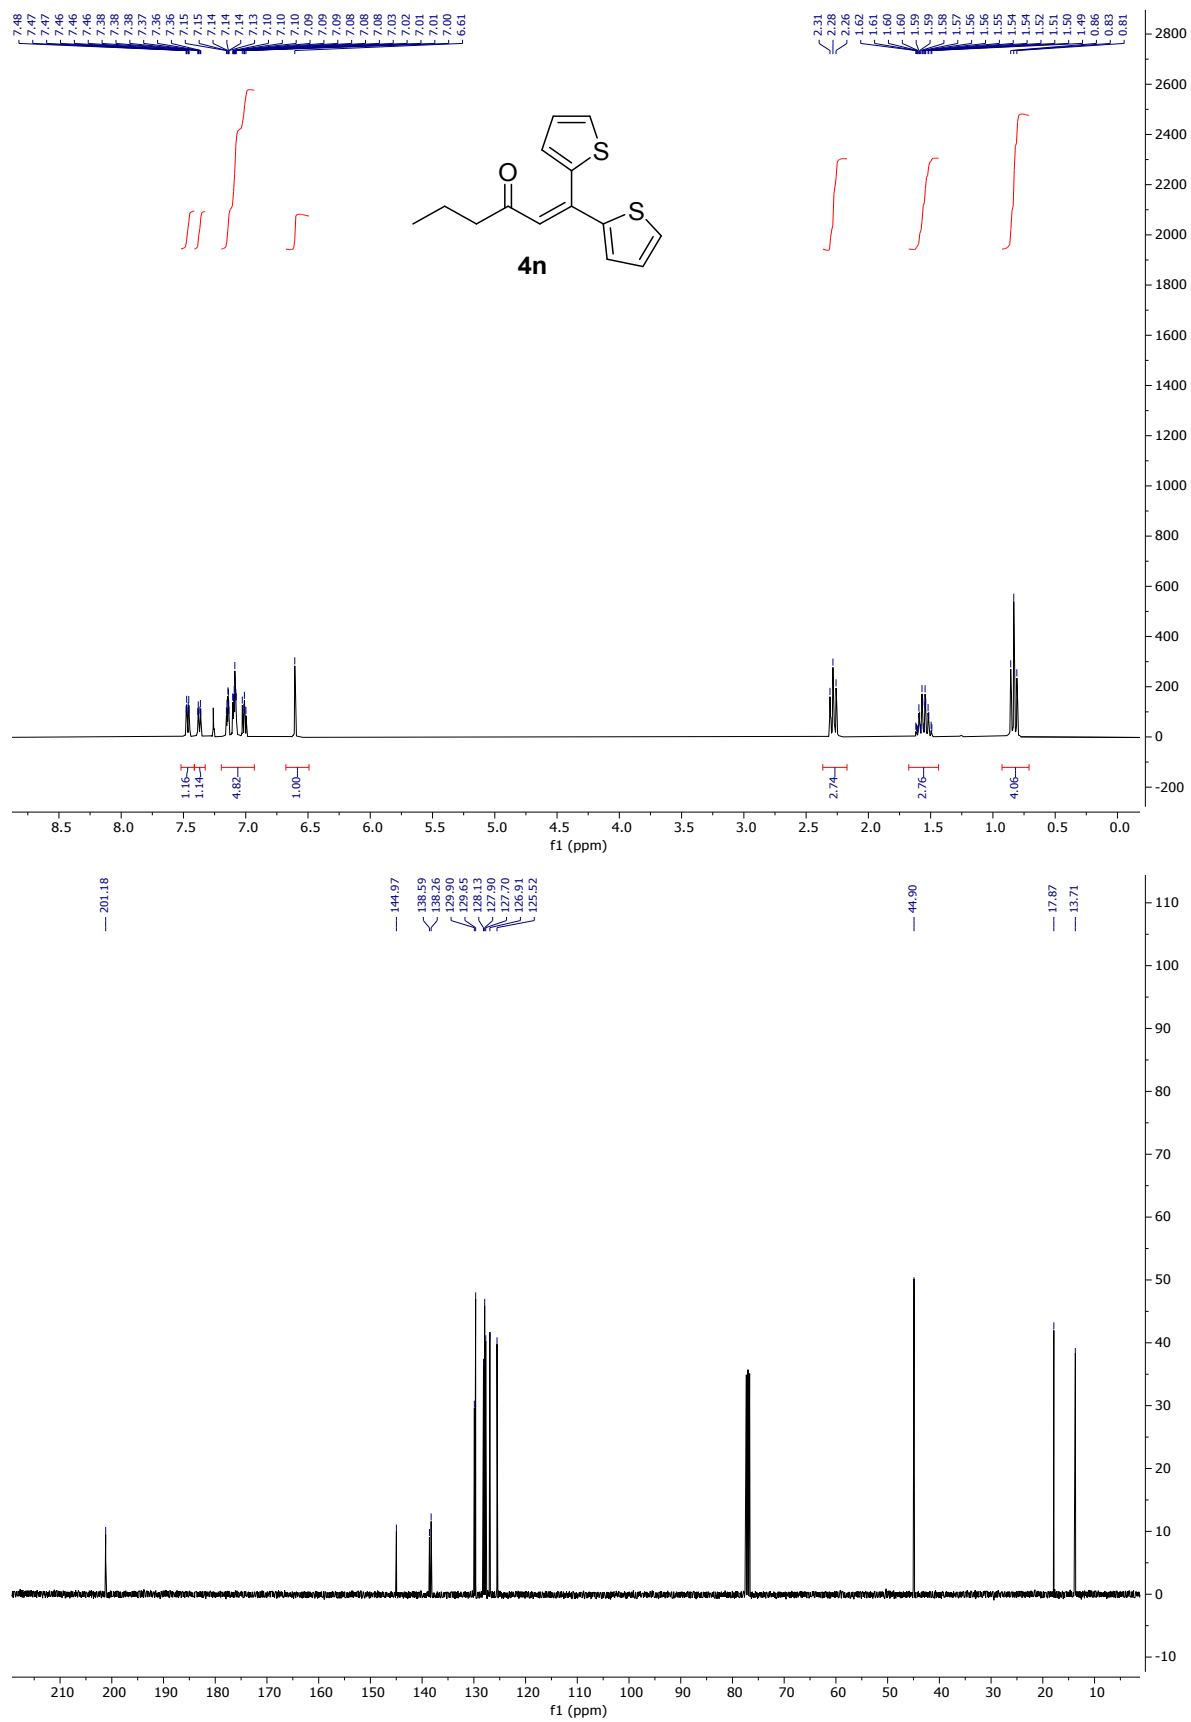



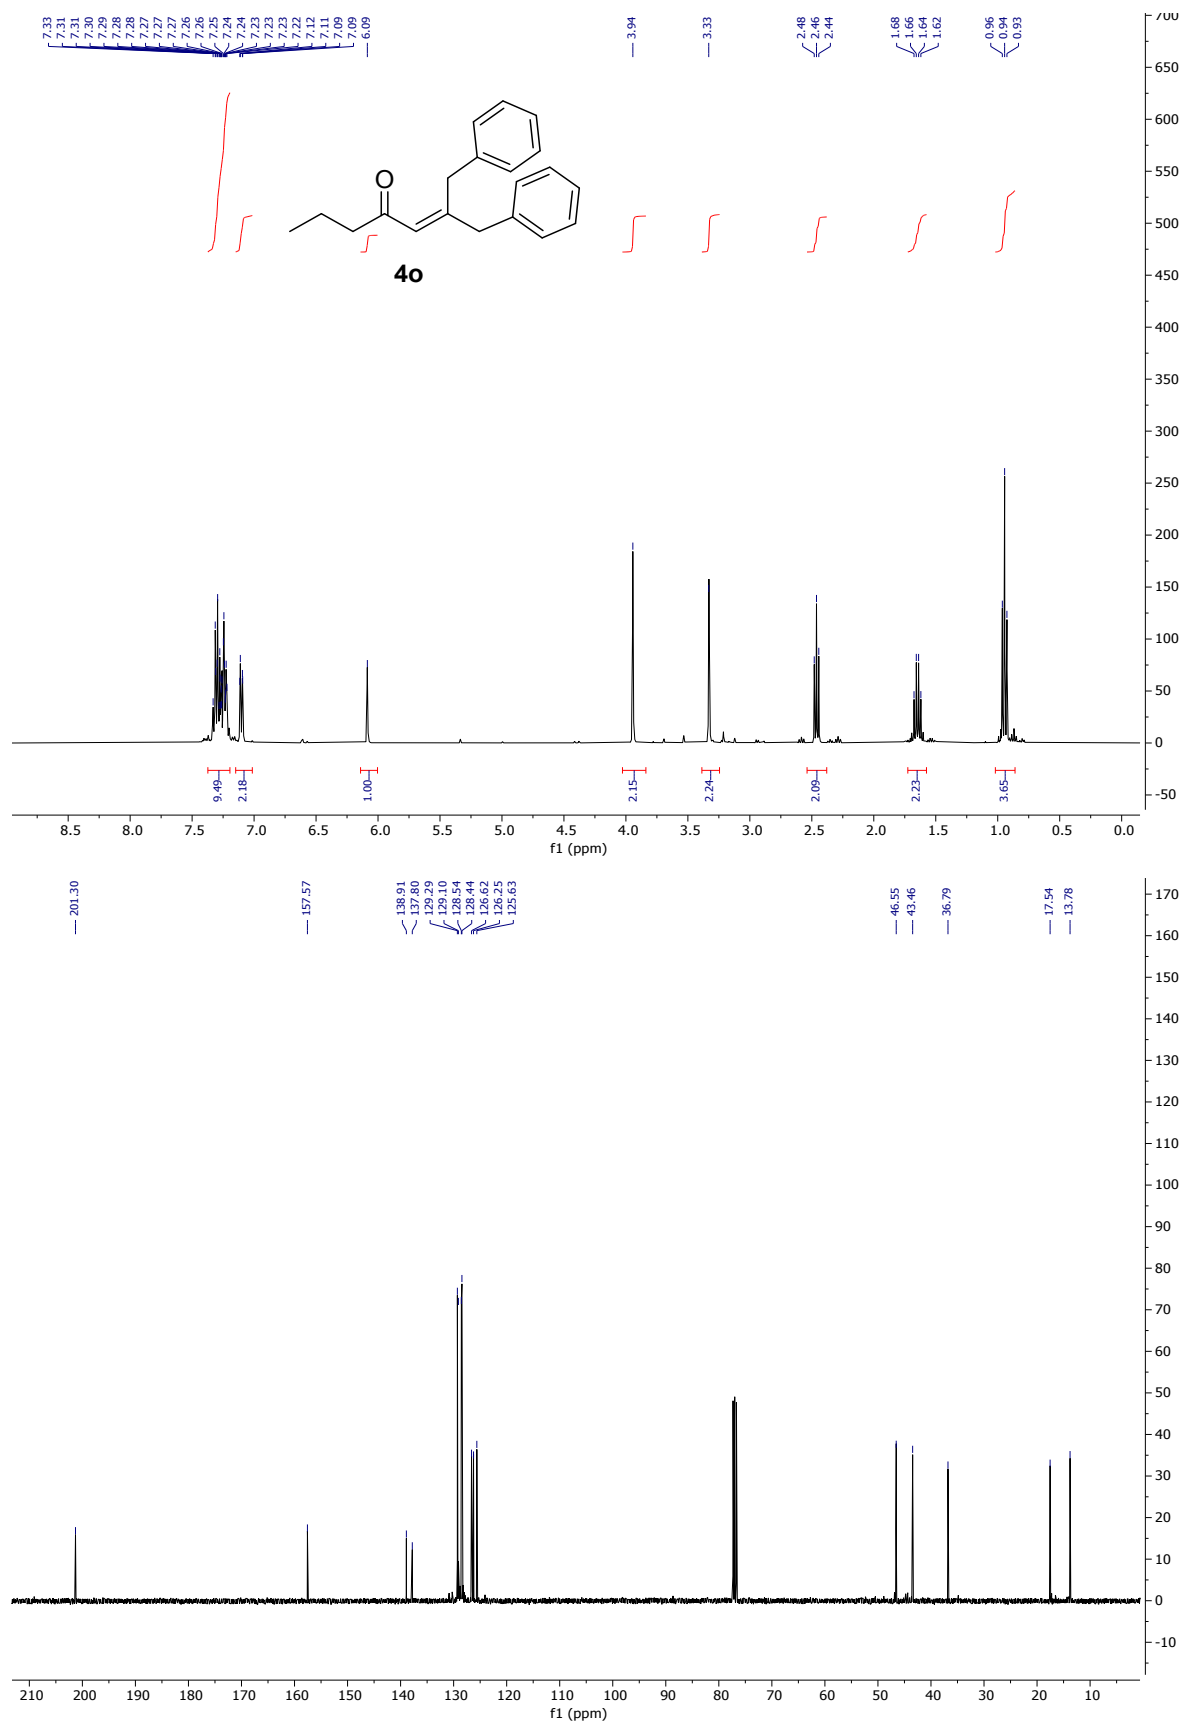

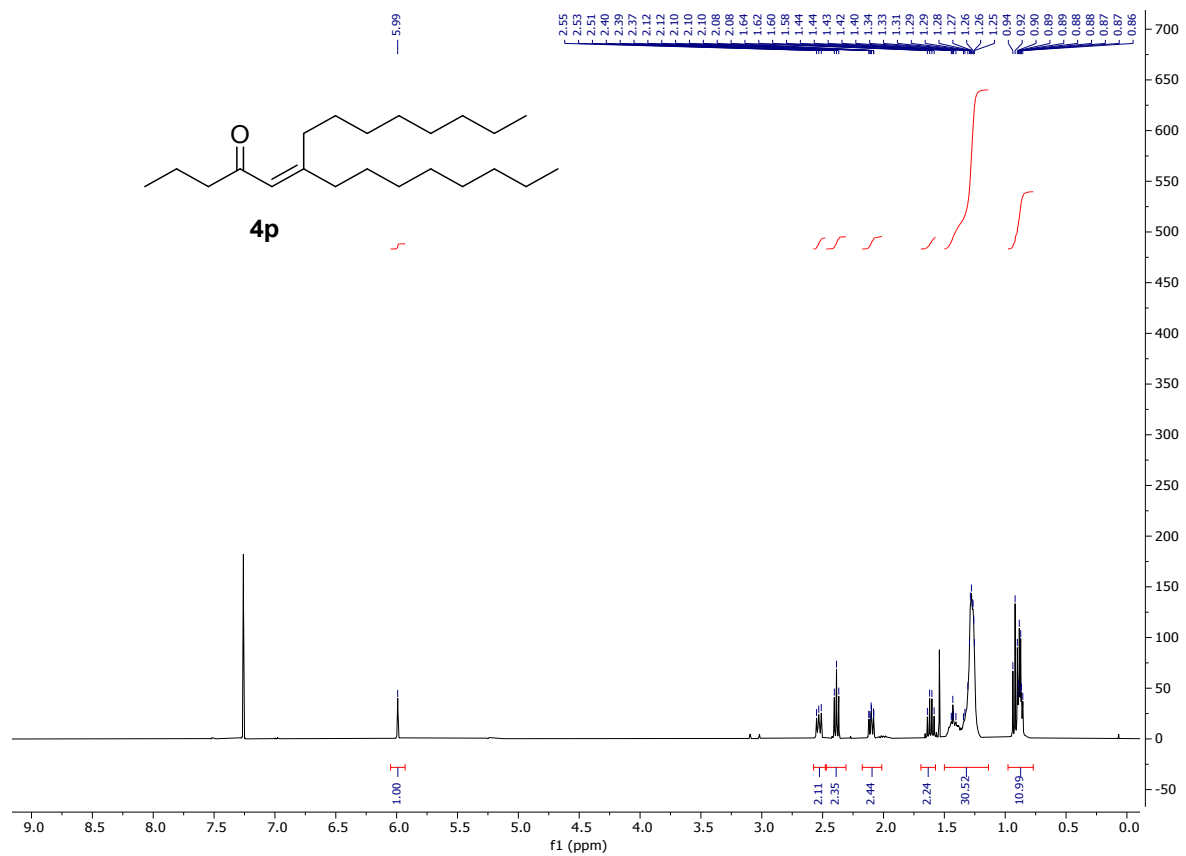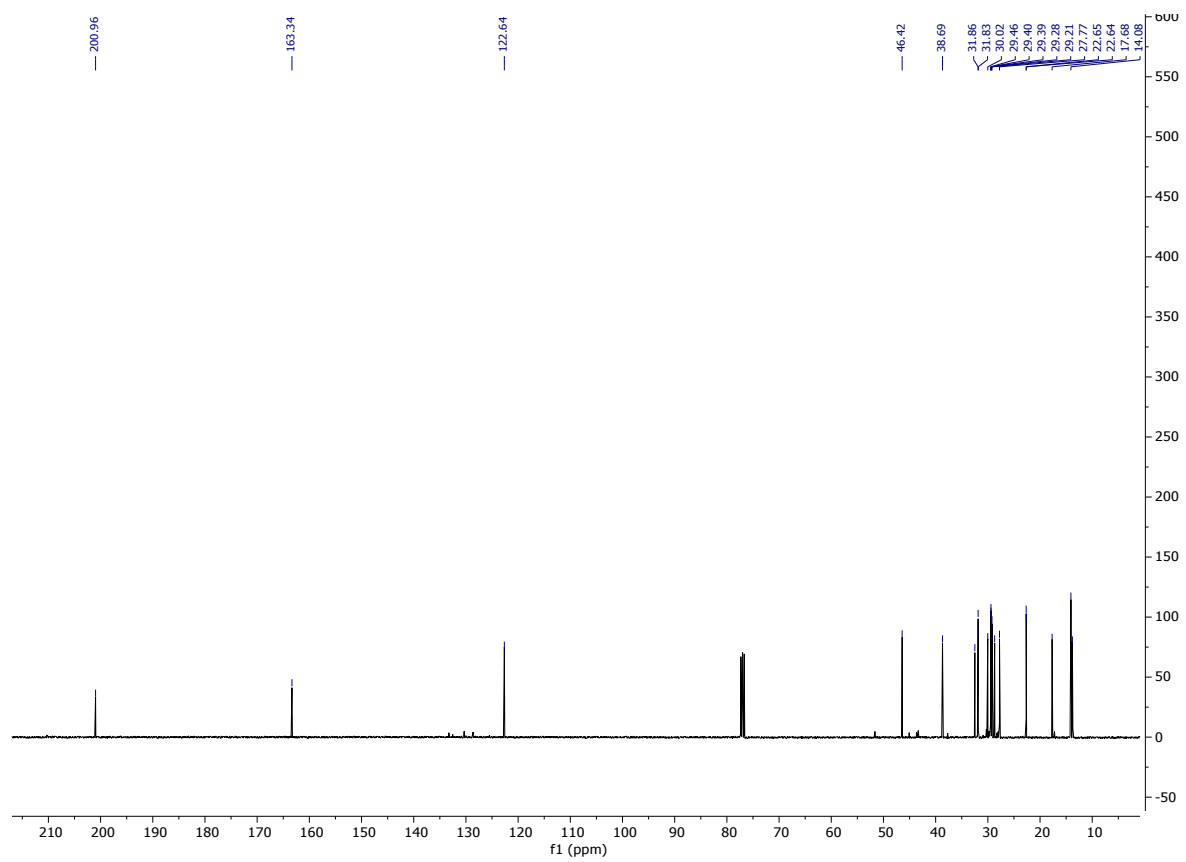

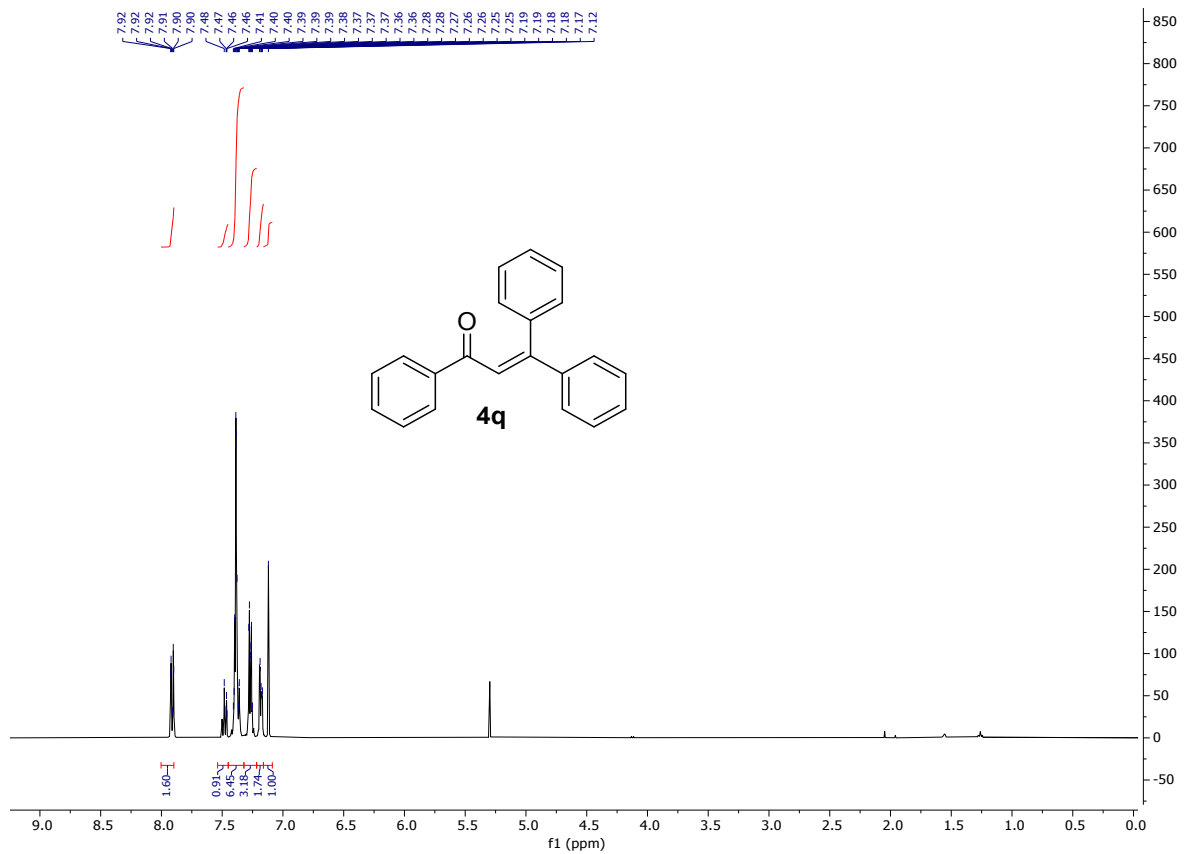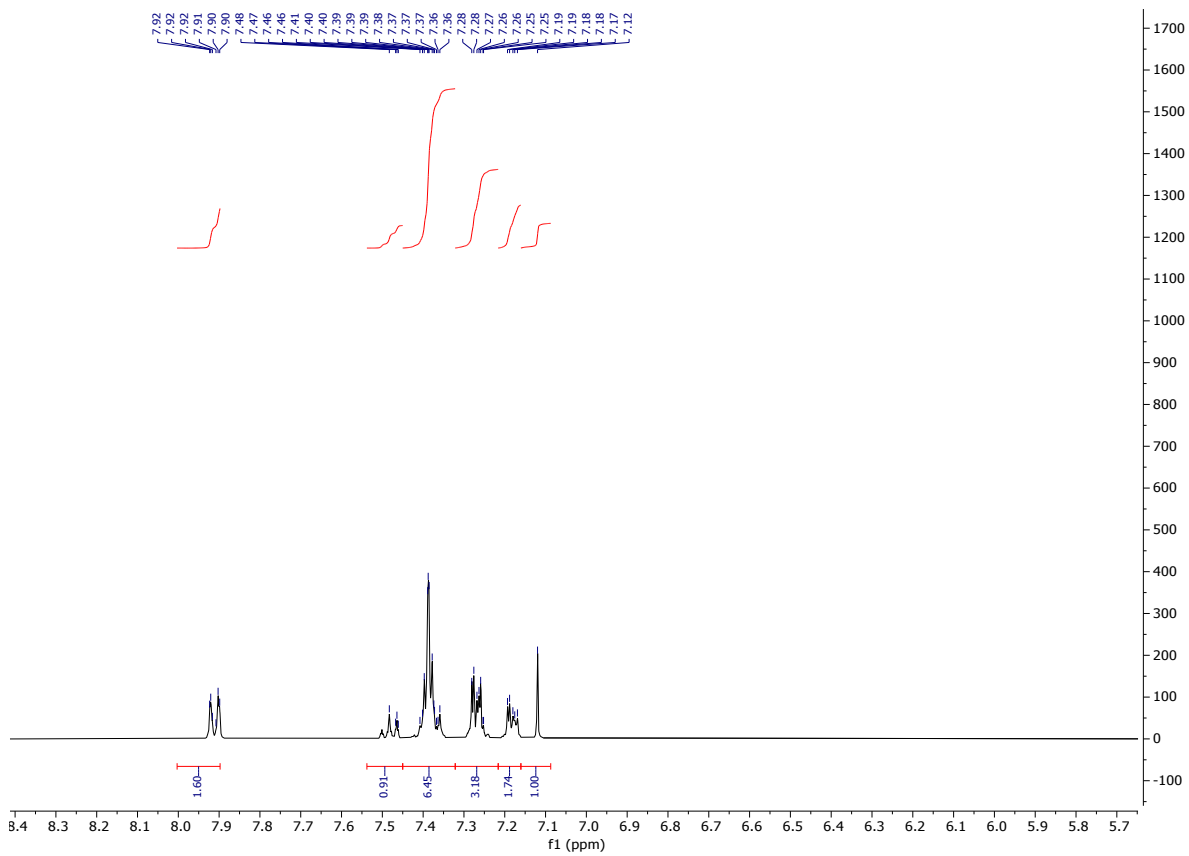

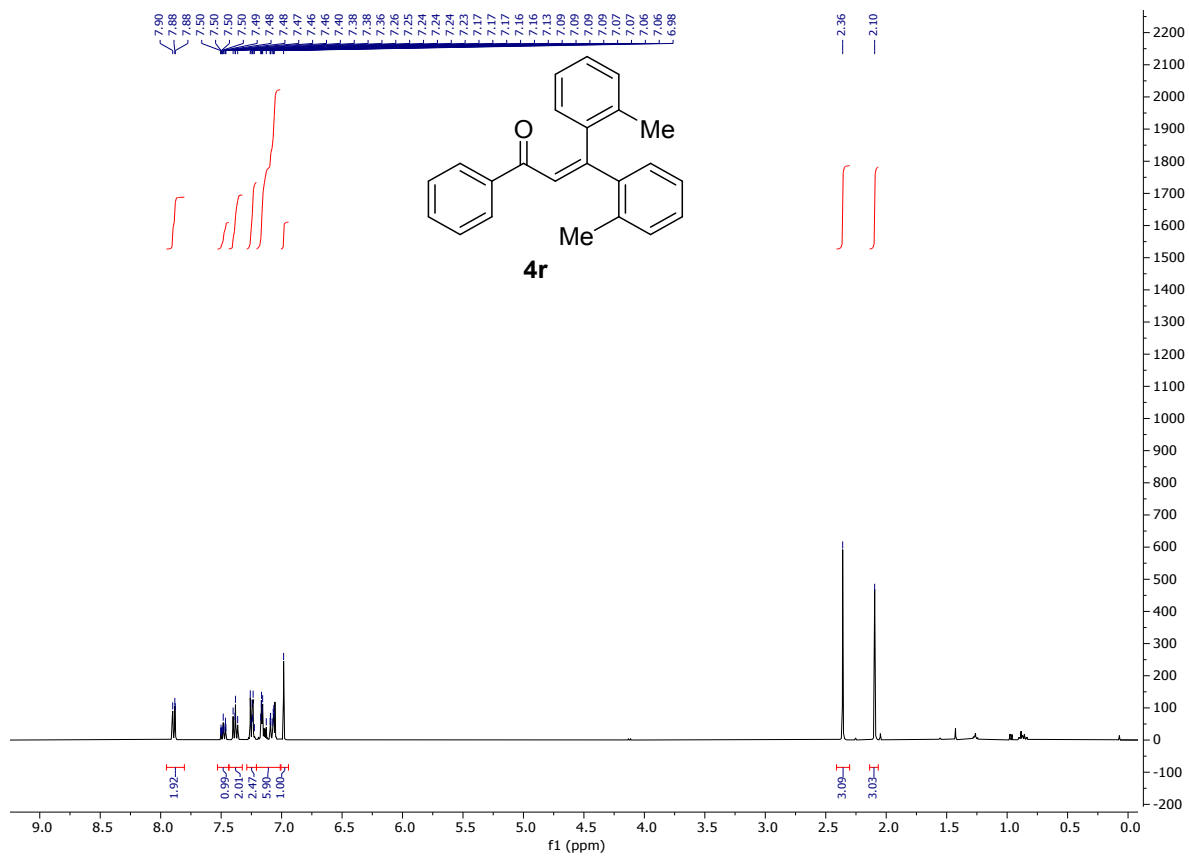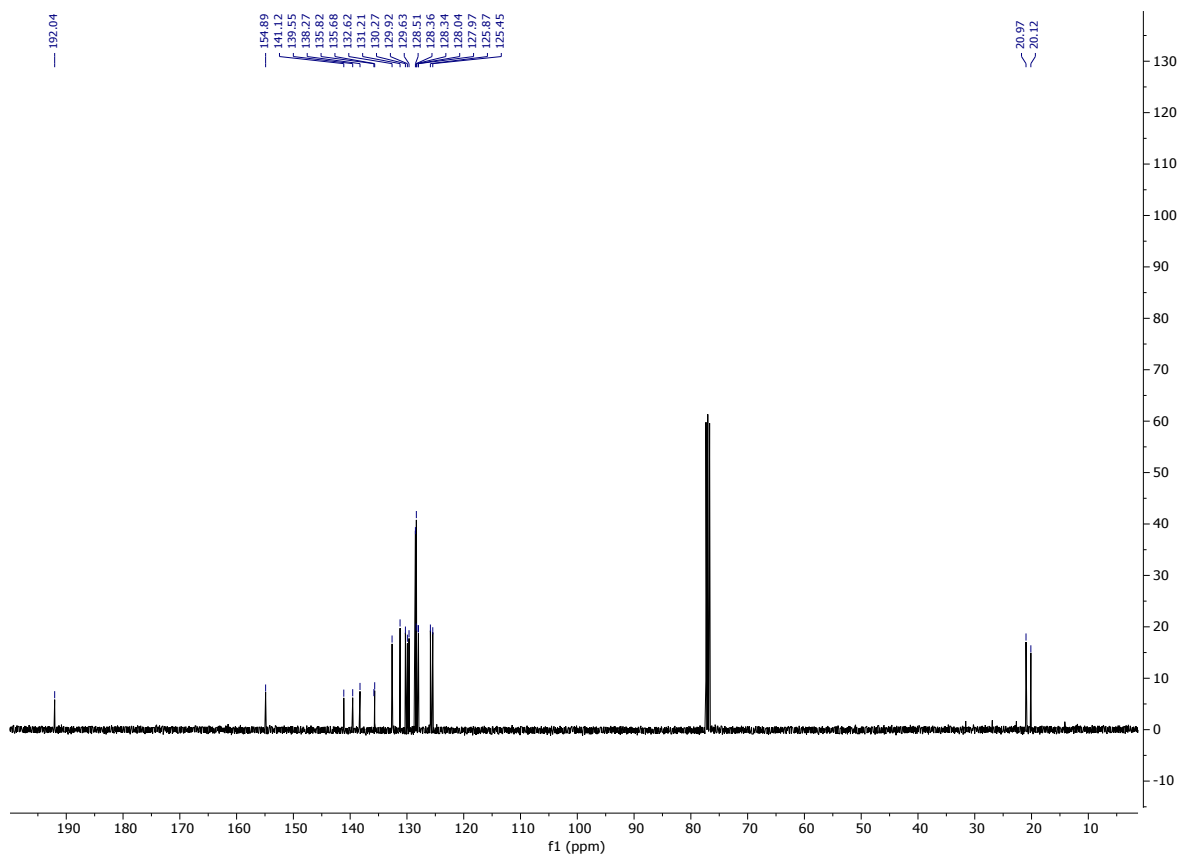

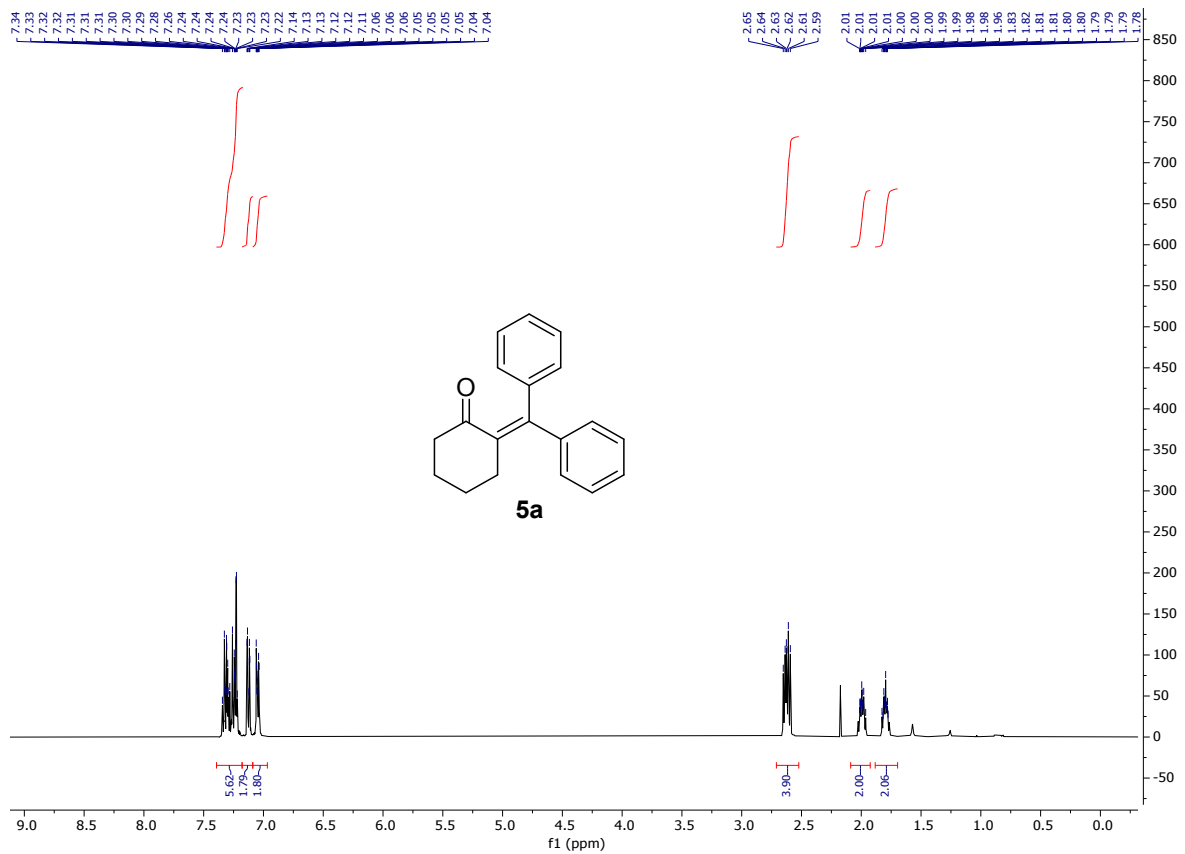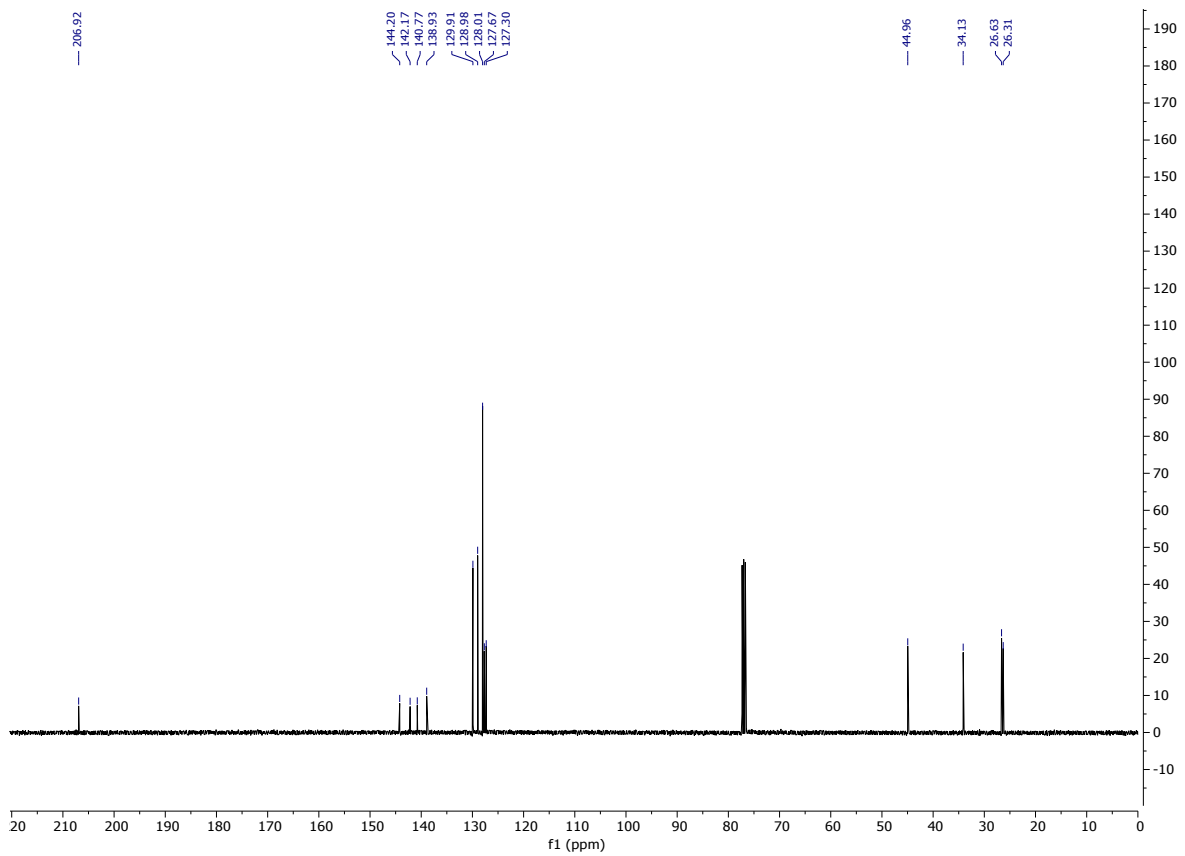

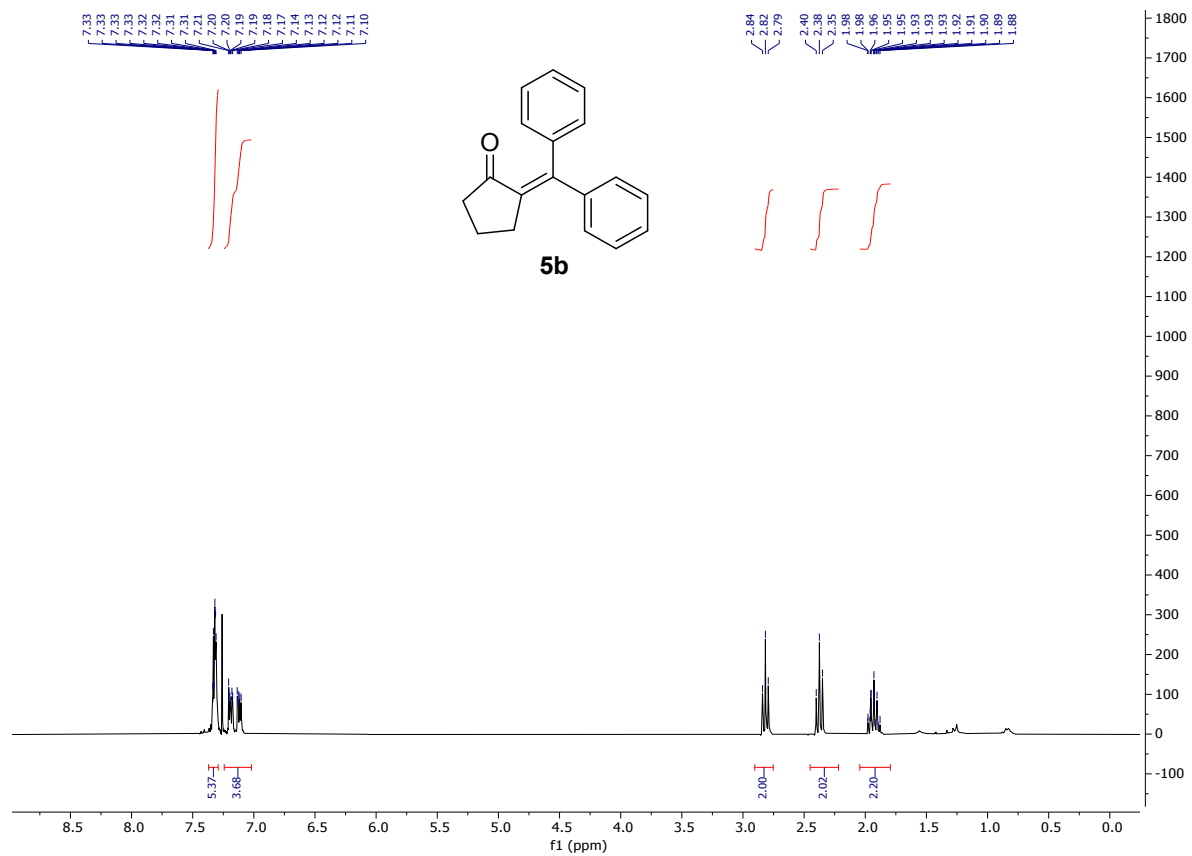

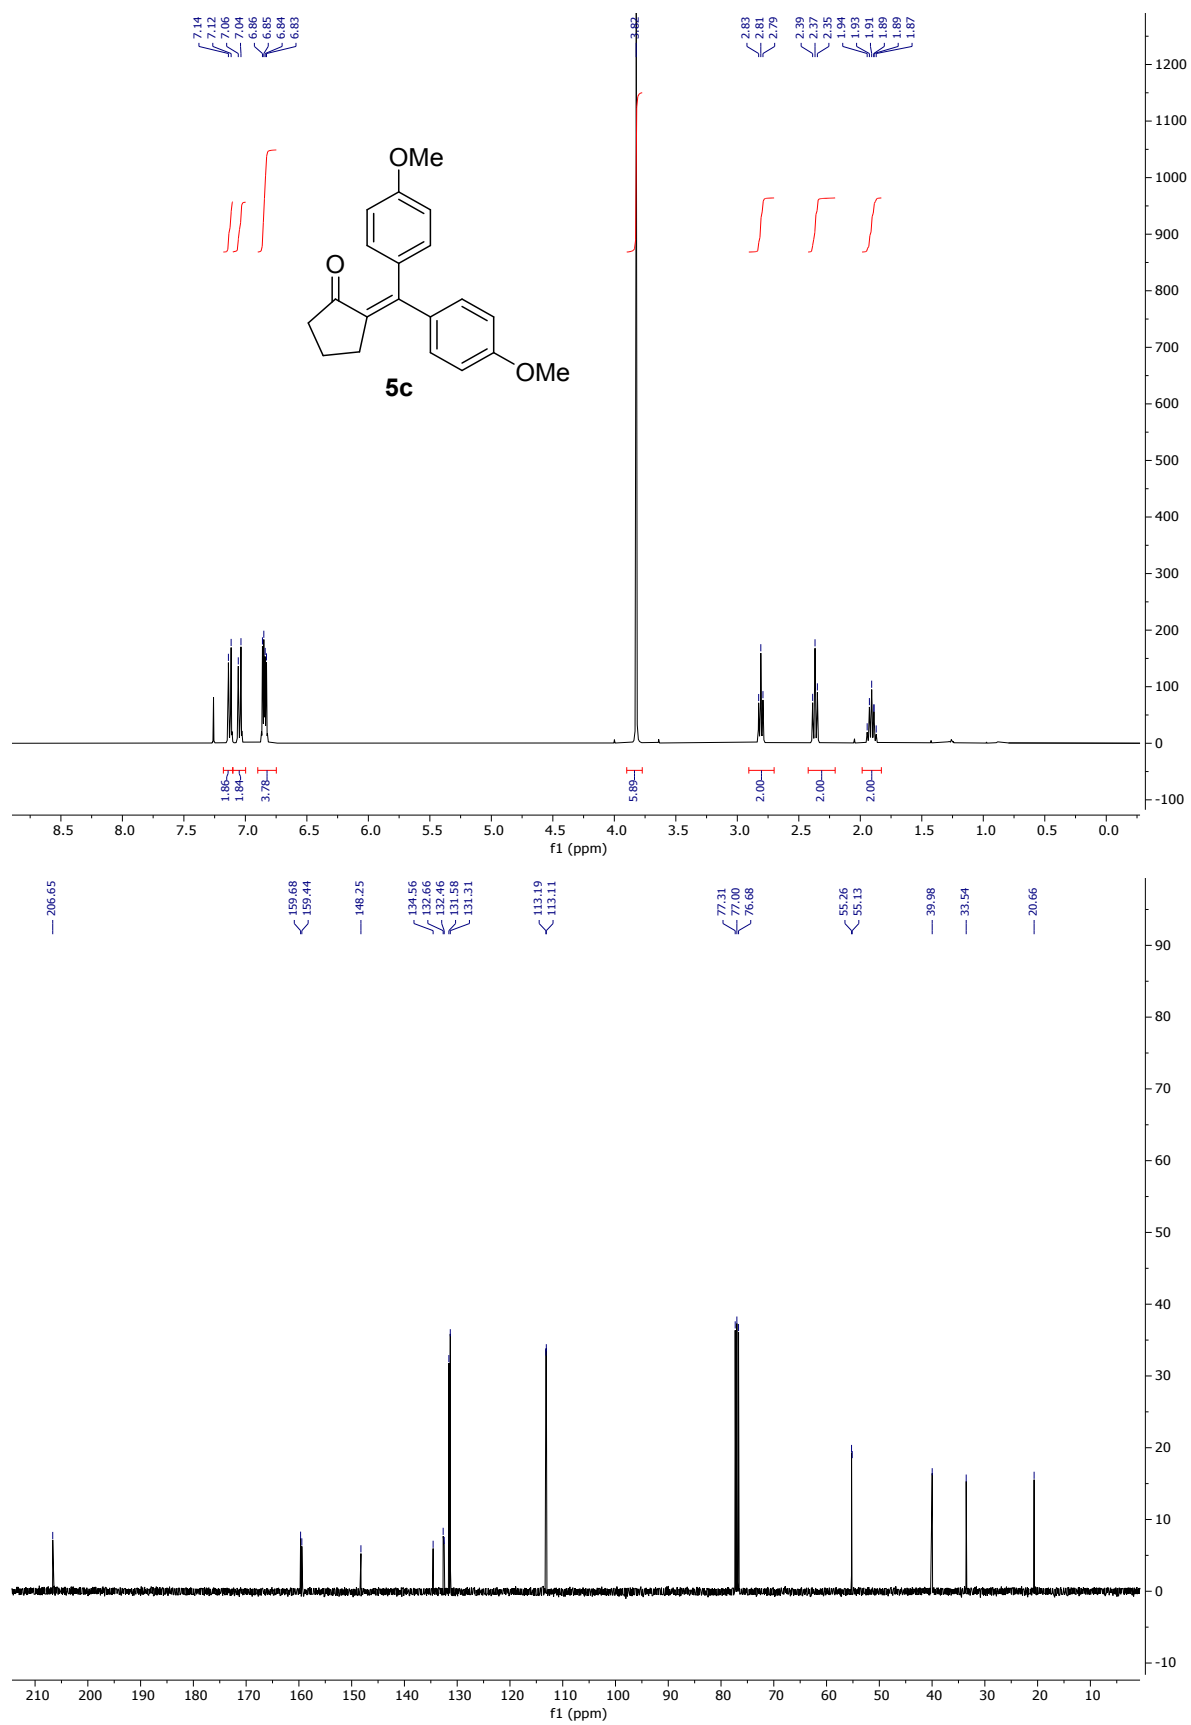

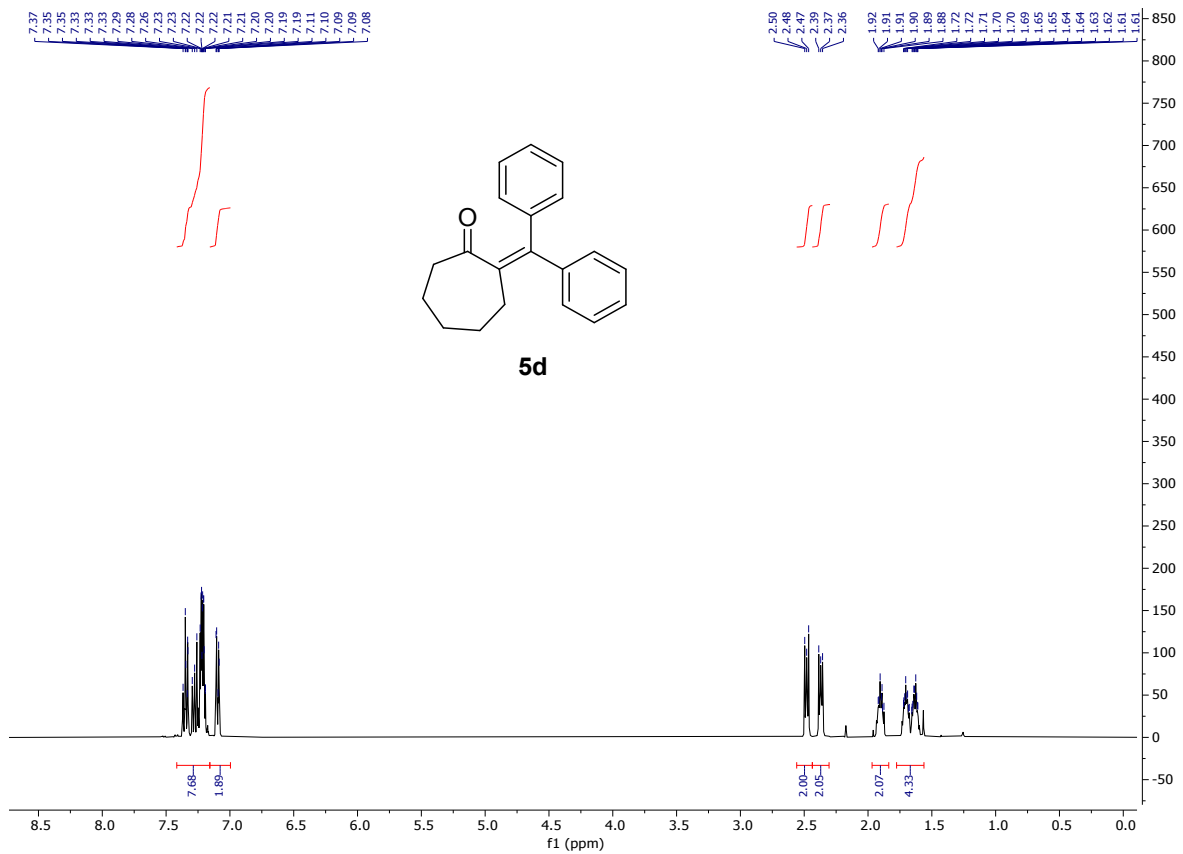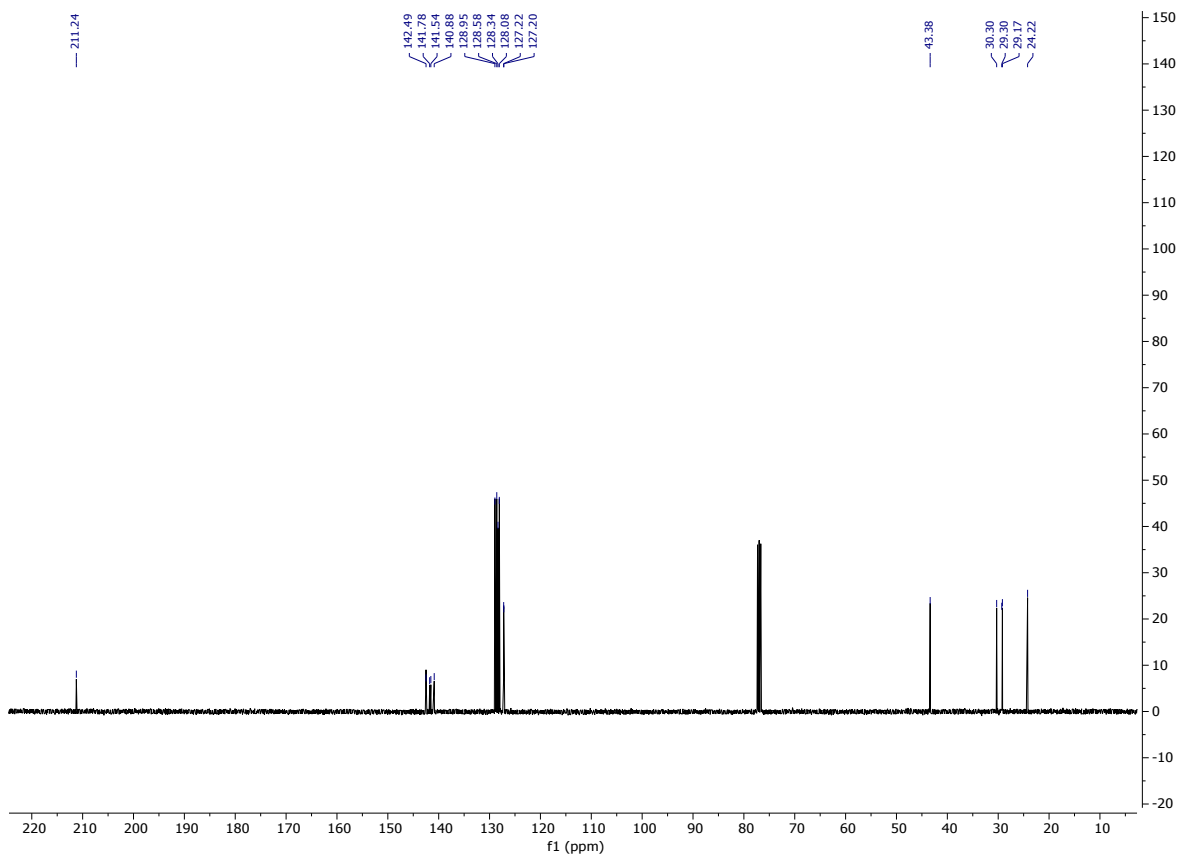



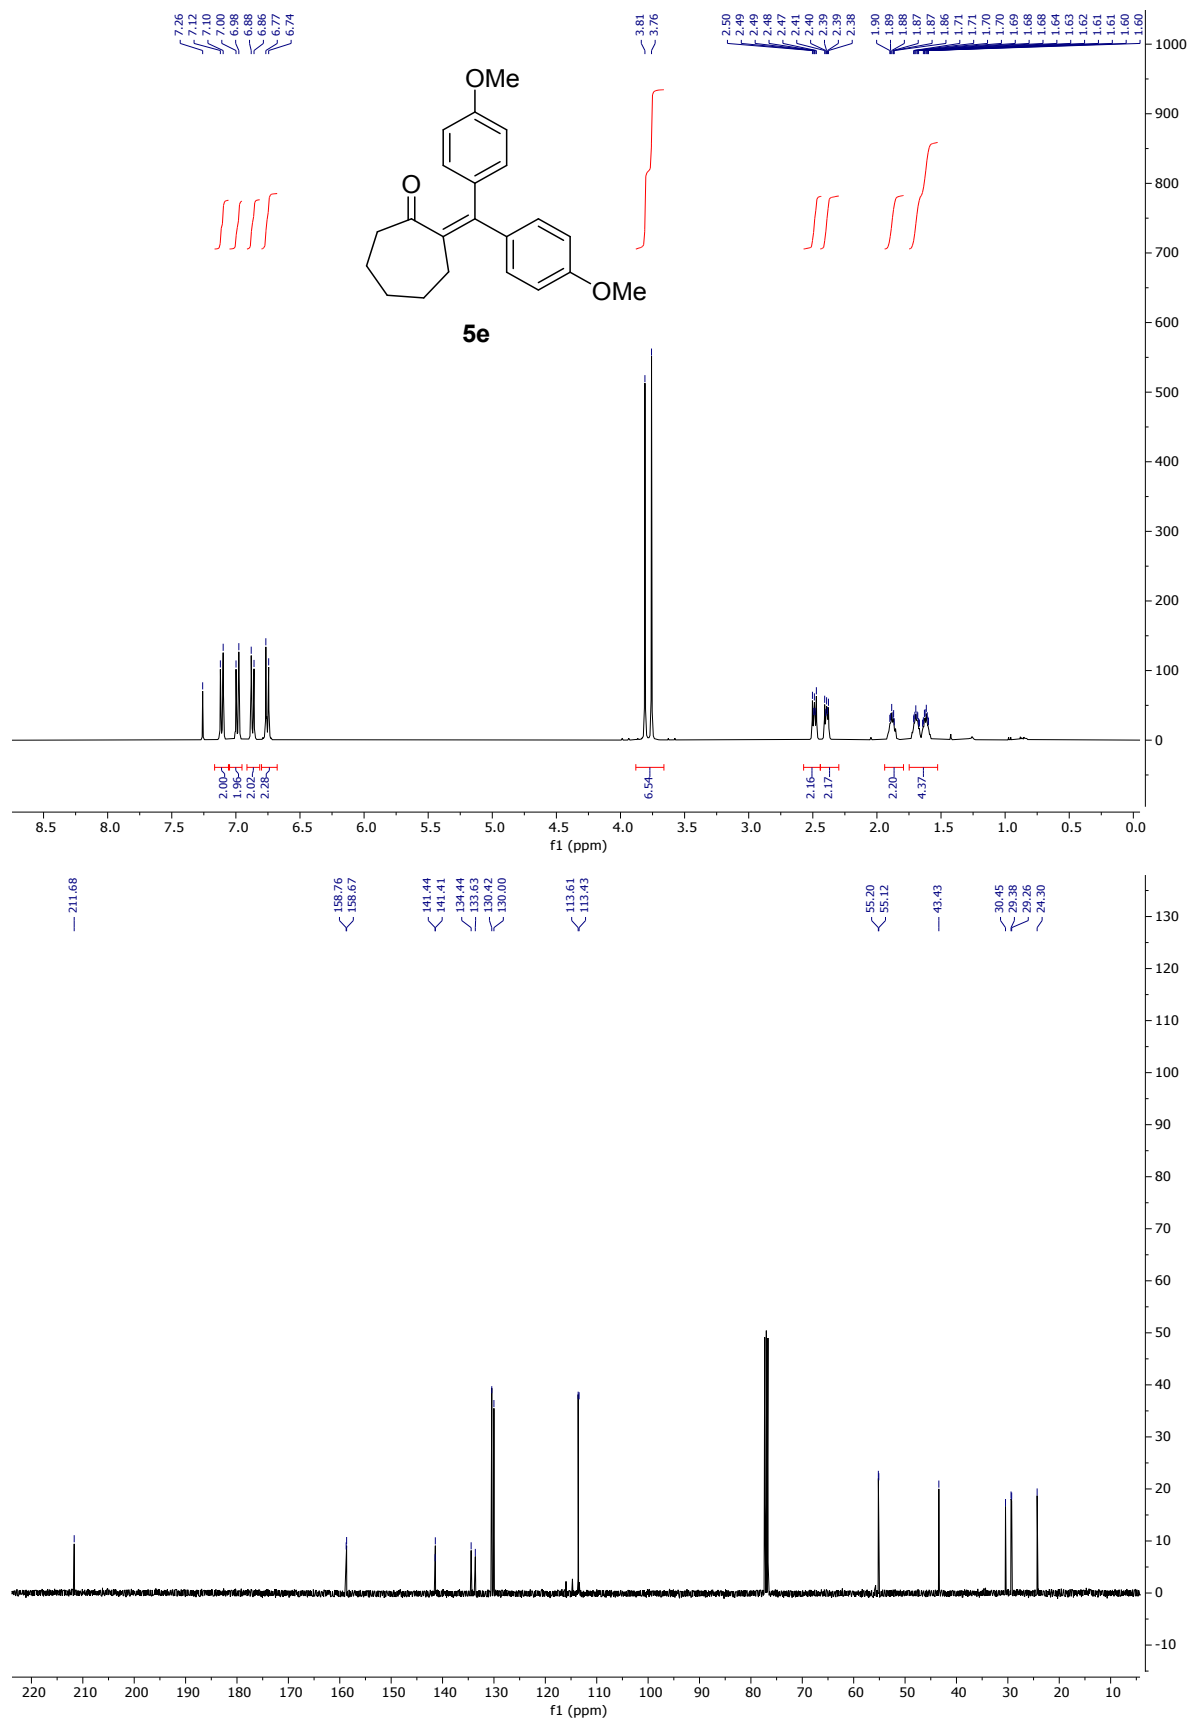

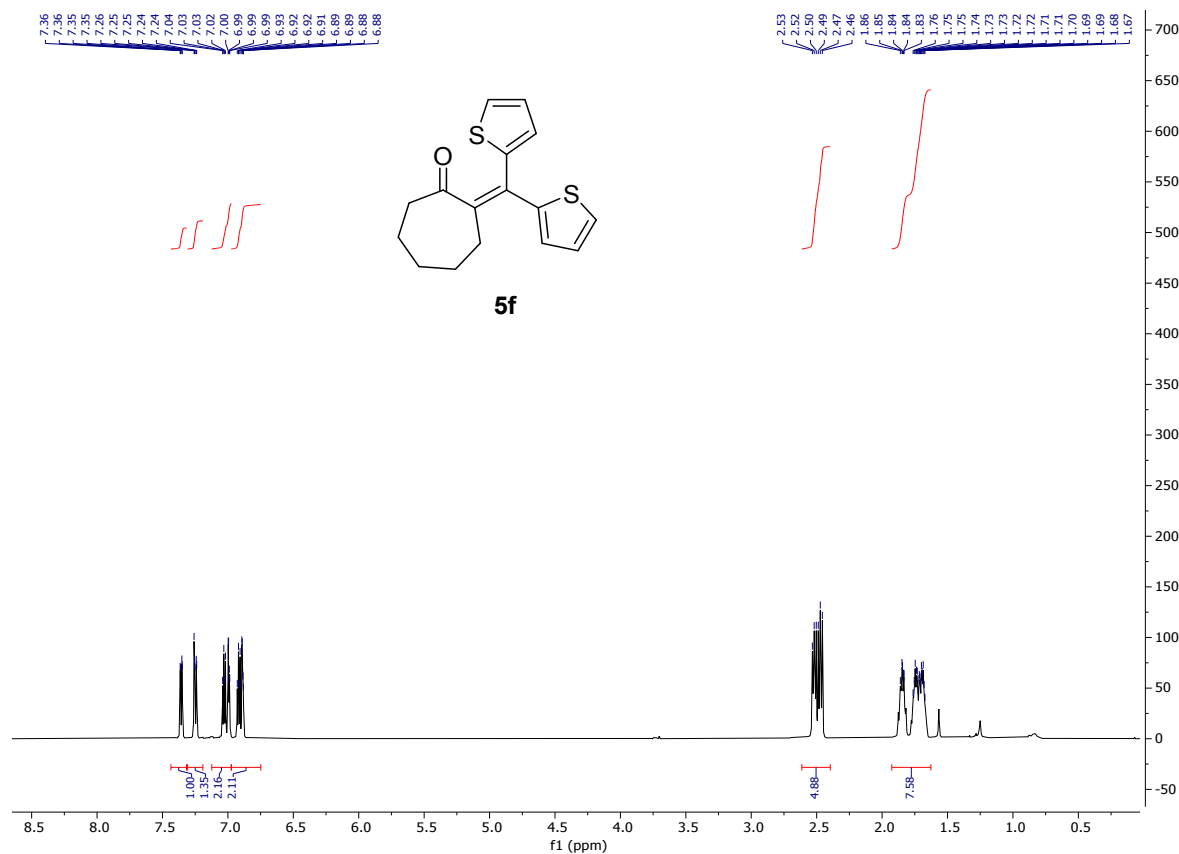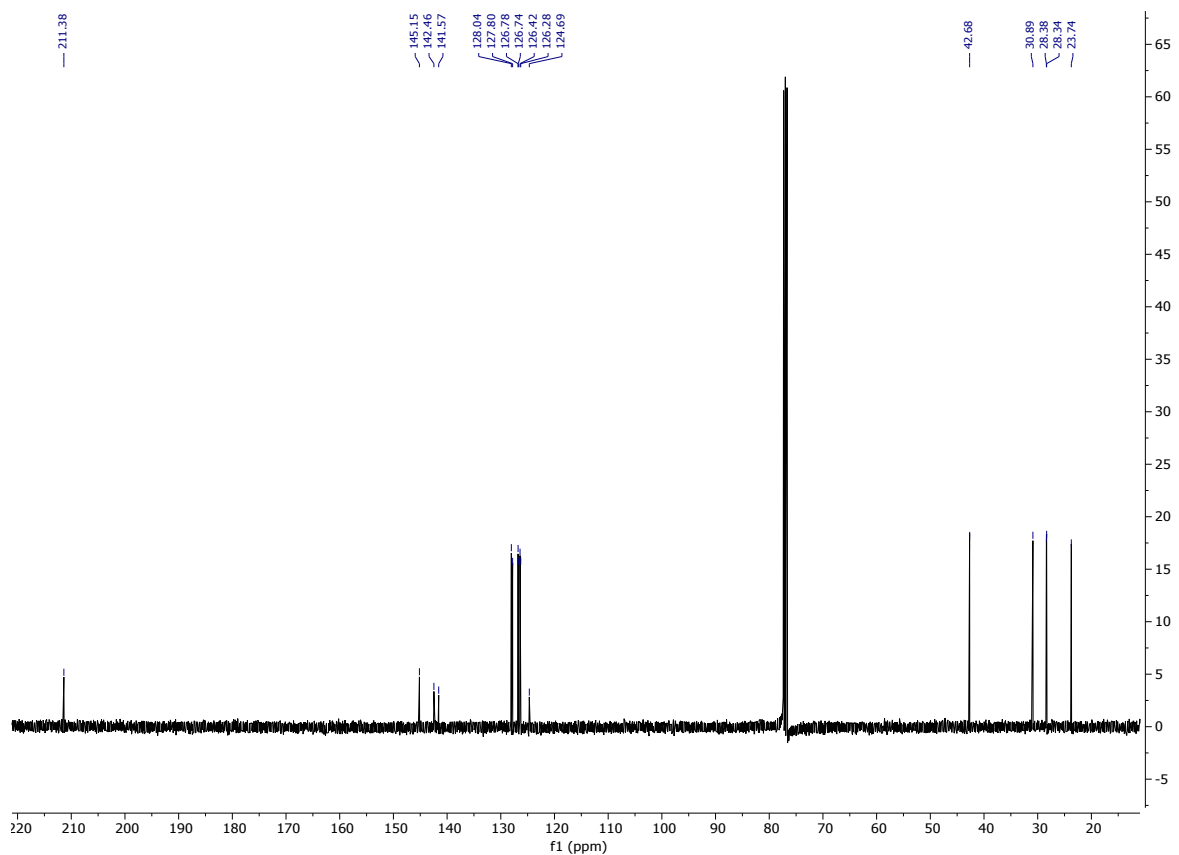

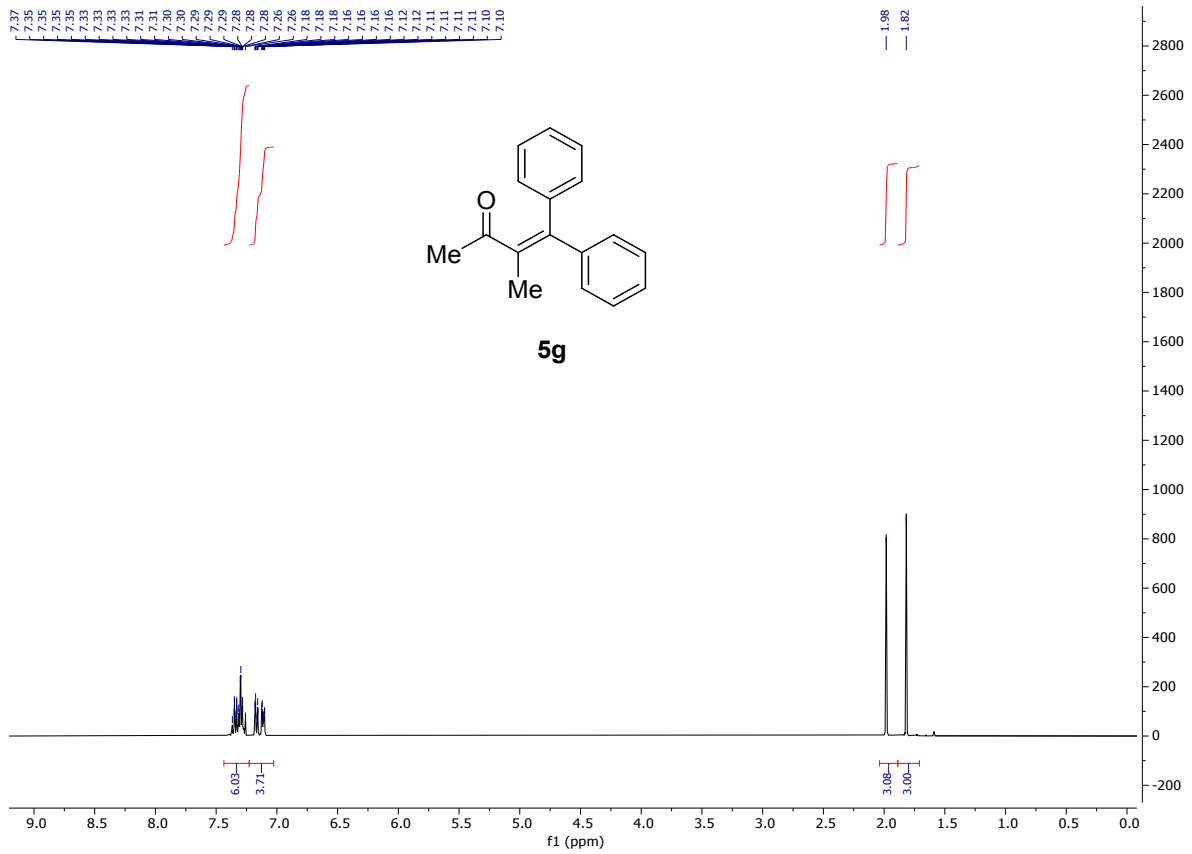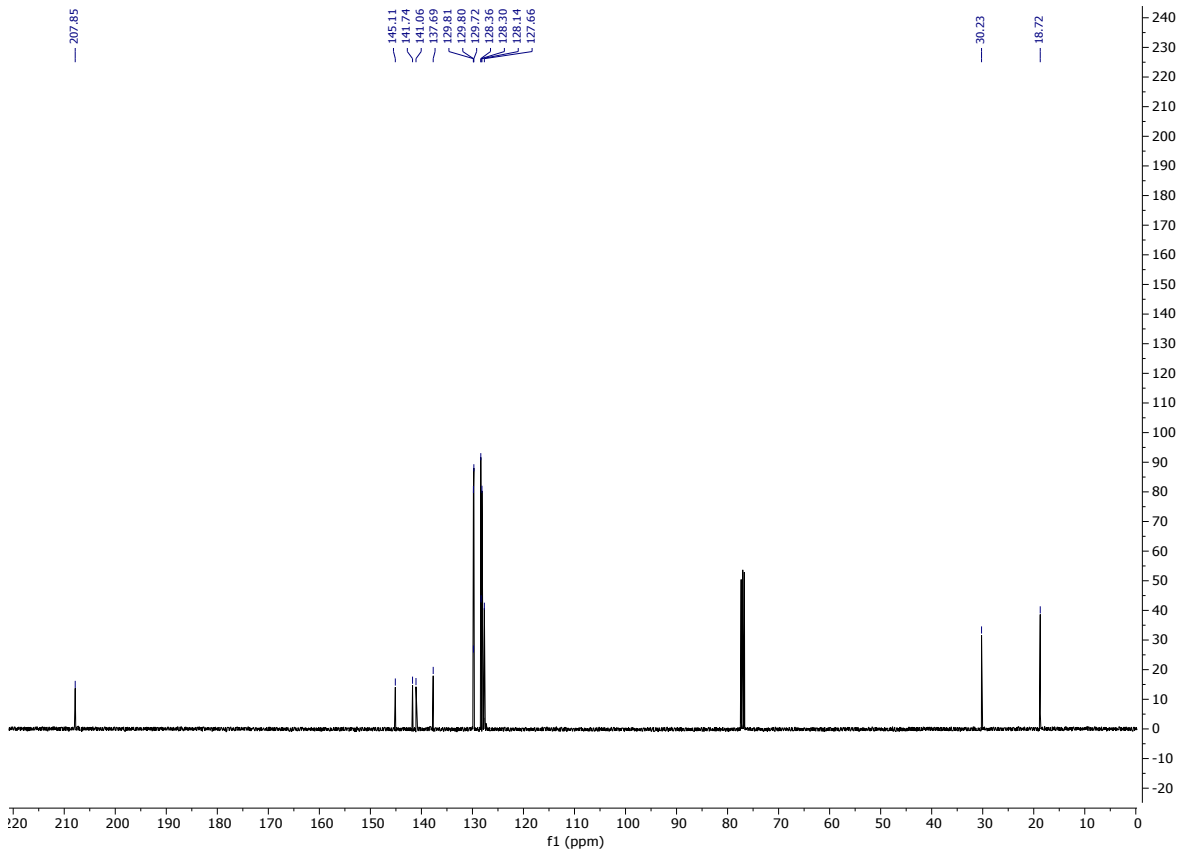

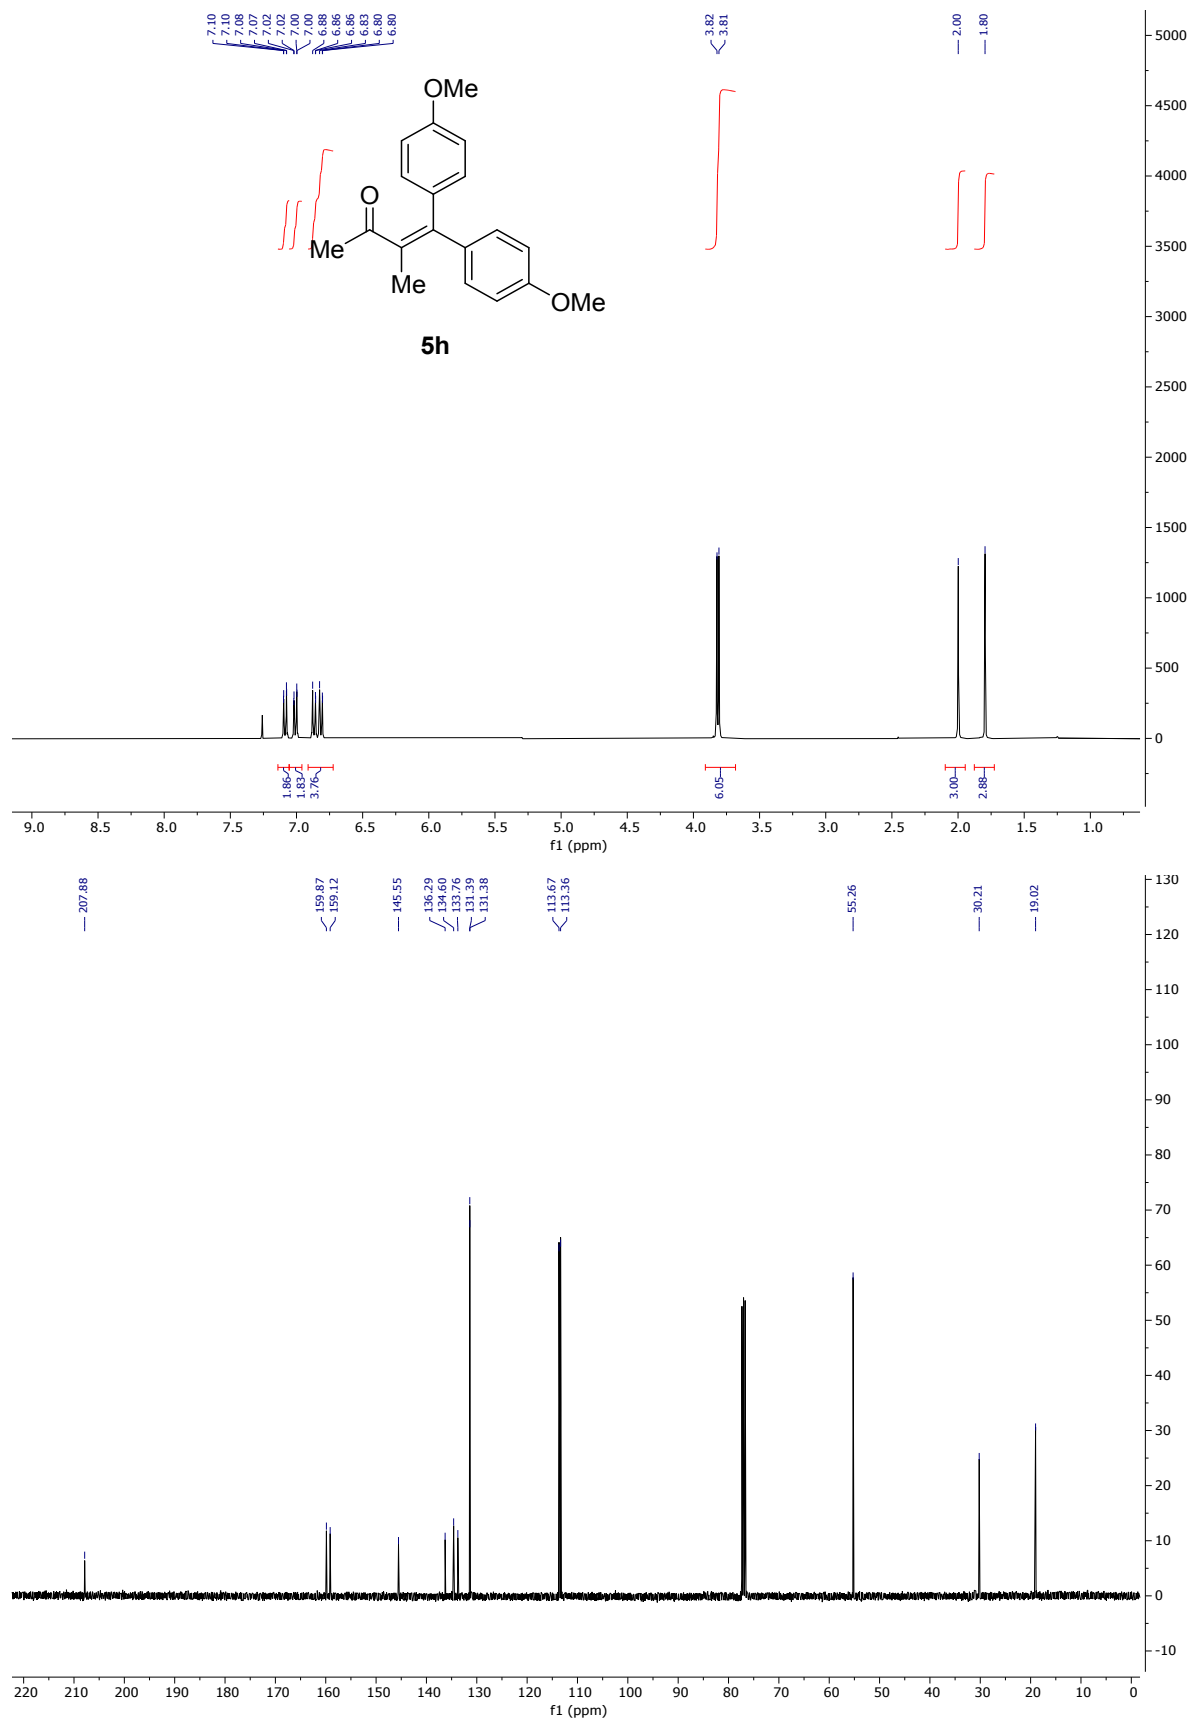

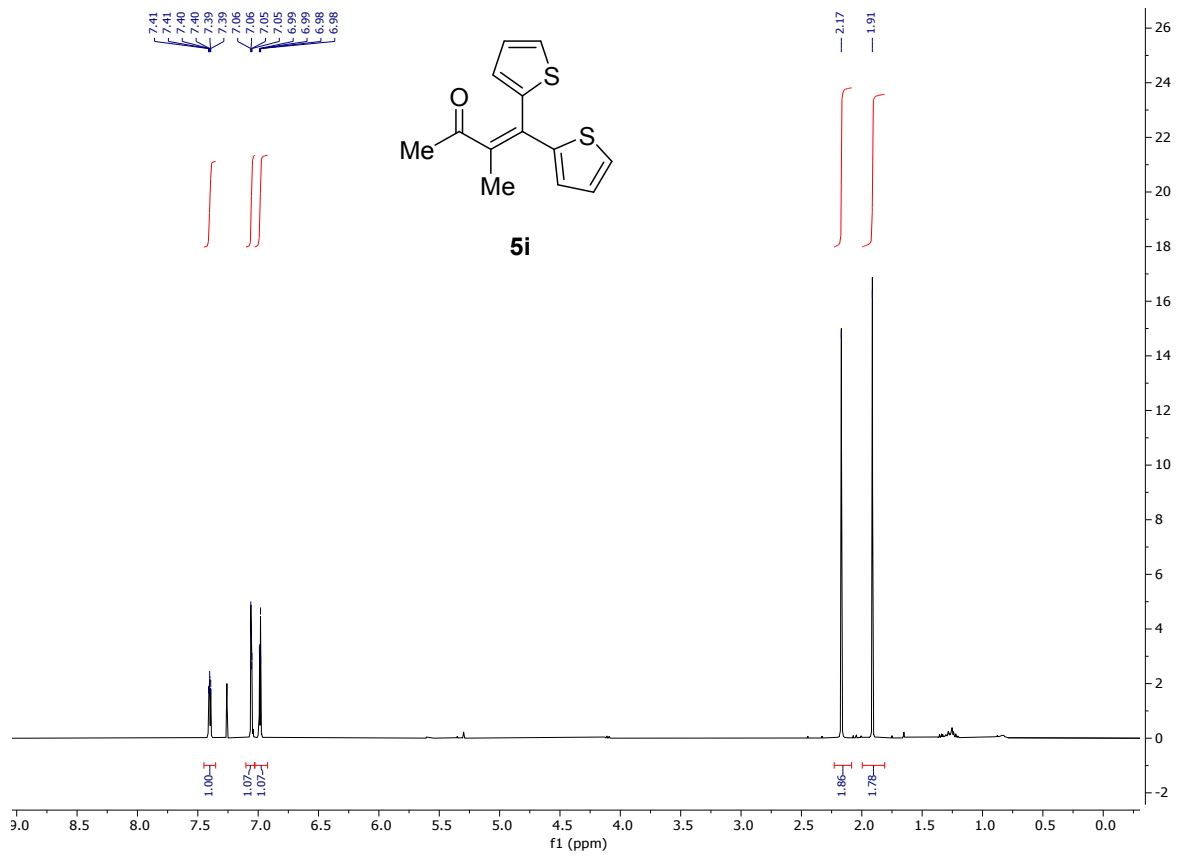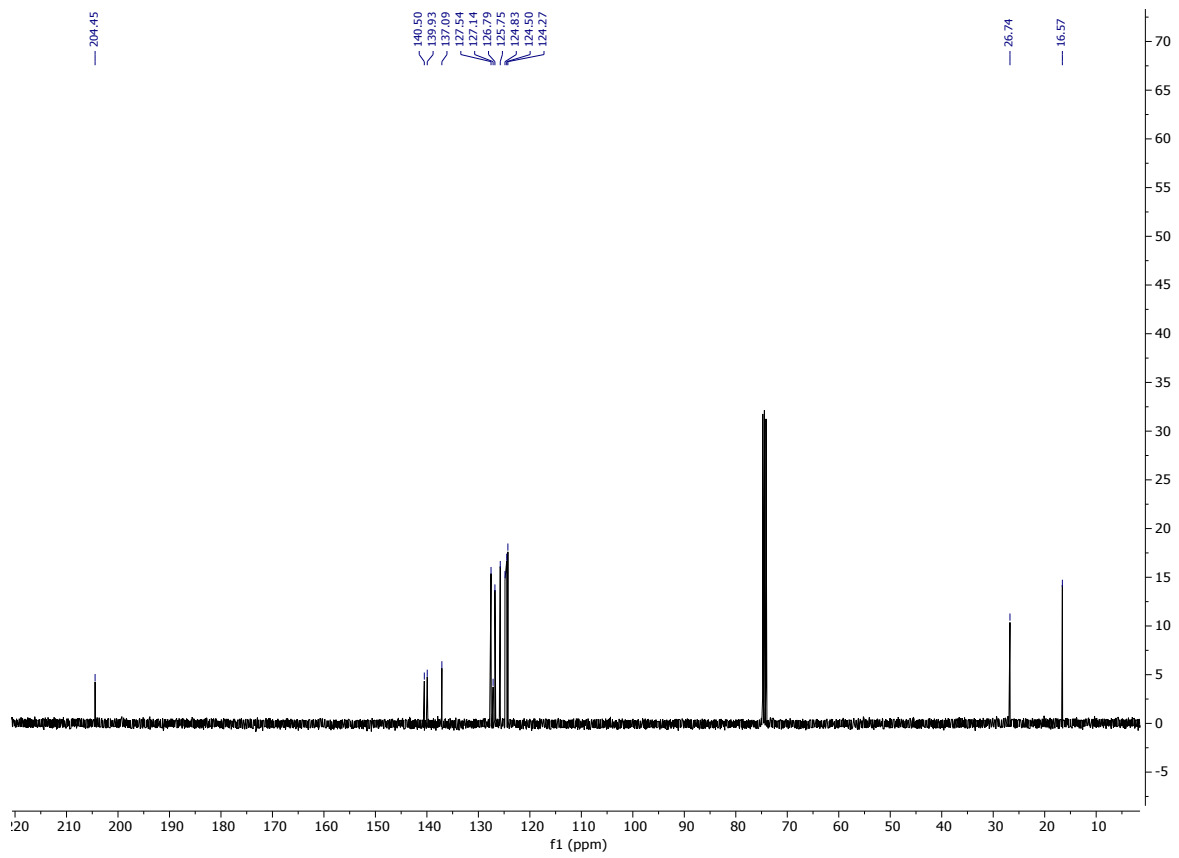

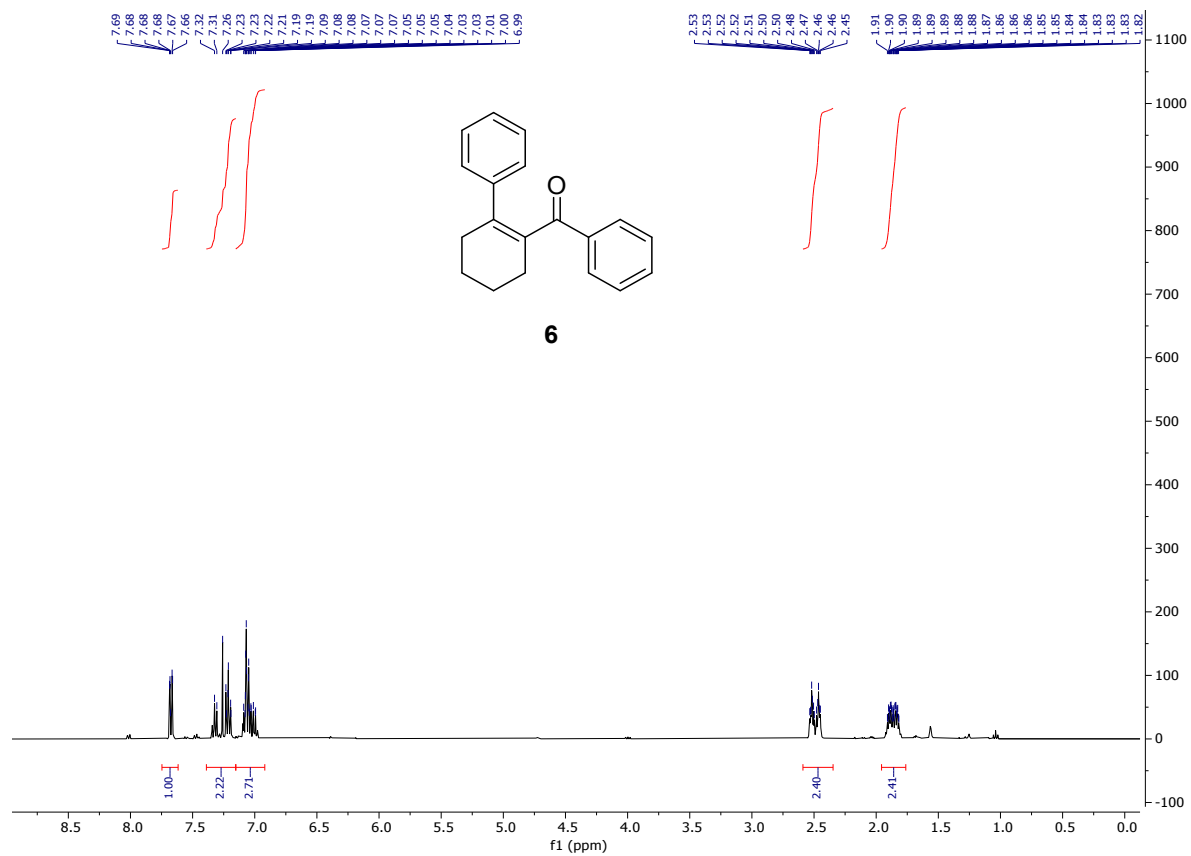

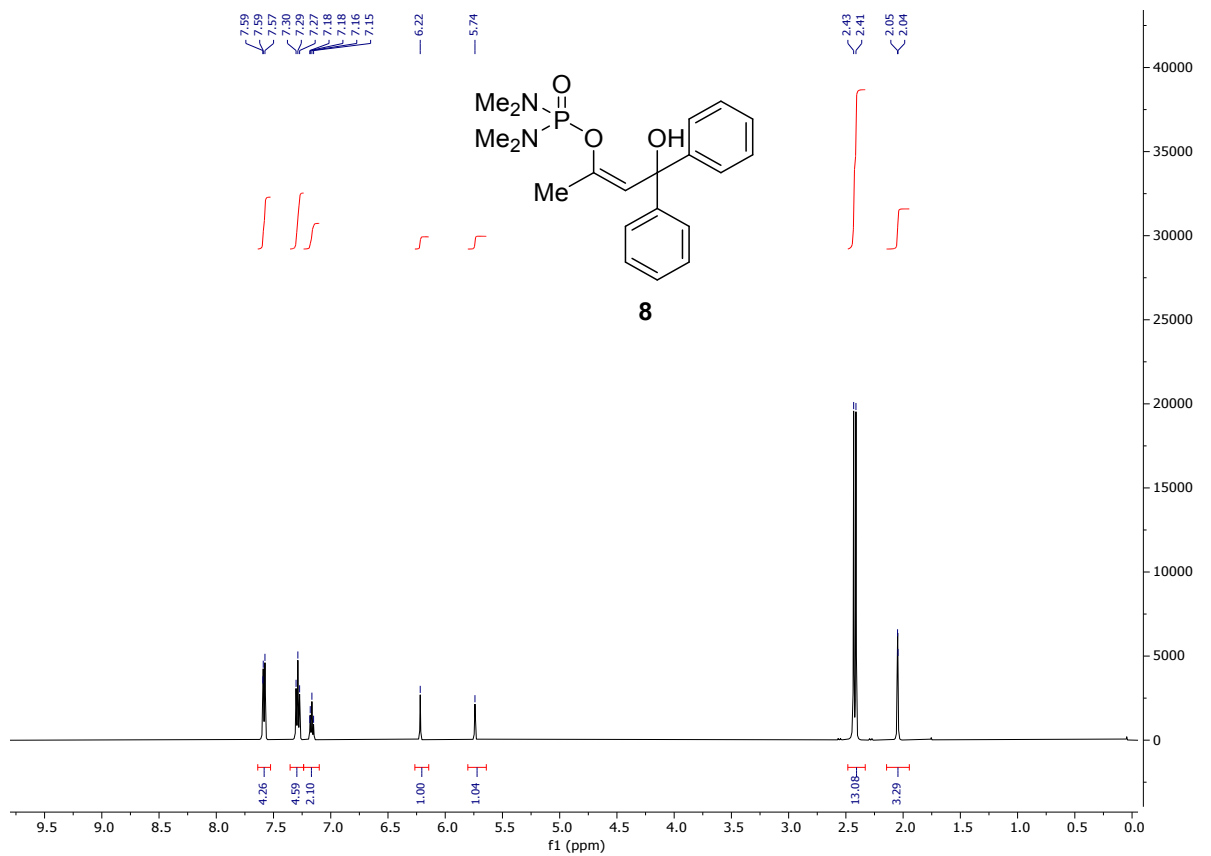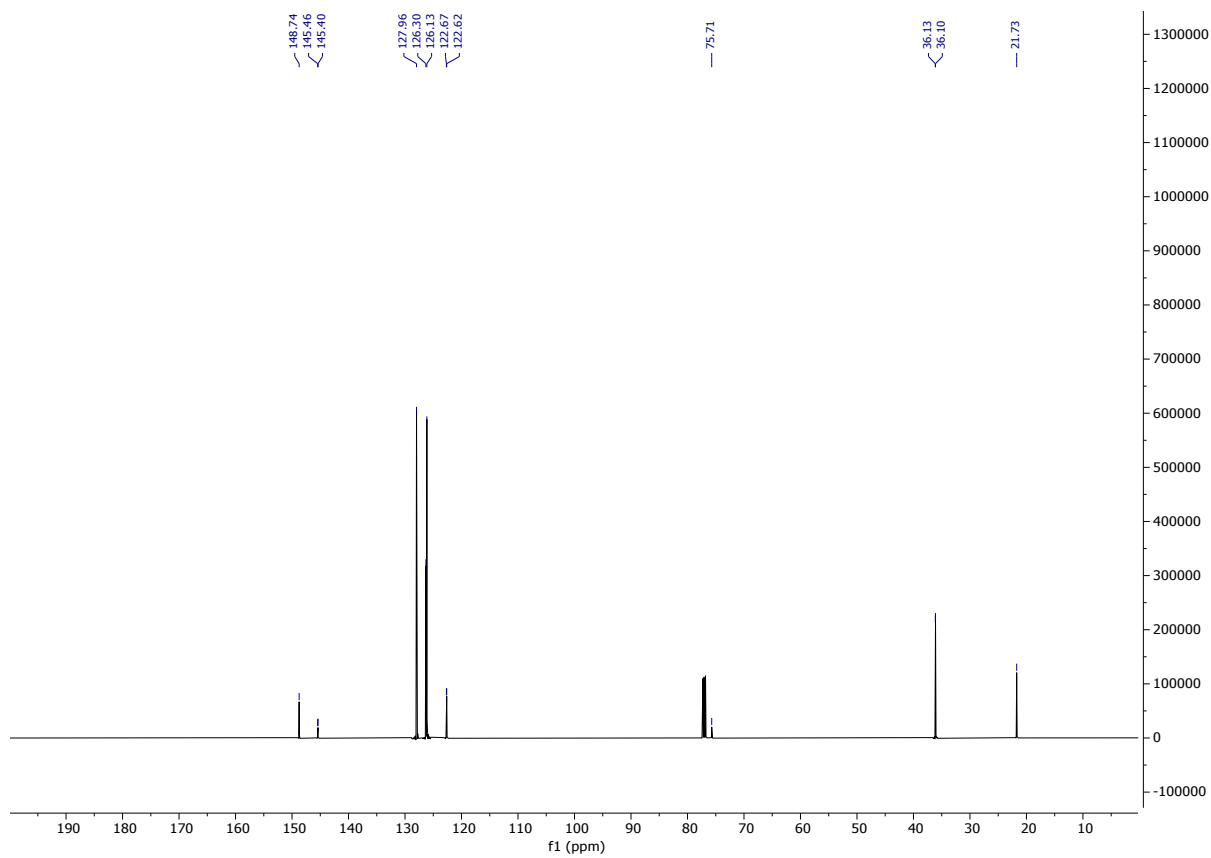

Supplement: d0ra07472a1.pdf [file d0ra07472a1.pdf]
